# Supplementary material for: Exploring the antitumor potential of novel quinoline derivatives via tubulin polymerization inhibition in breast cancer; design, synthesis and molecular docking
Source: Royal Society of Chemistry journal article supplement (doi:10.1039/d4ra04371e), 2024-01-01
Supplement: d4ra04371e1.pdf [file d4ra04371e1.pdf]

**Exploring the Antitumor Potential of Novel Quinoline Derivatives *Via* Tubulin  
Polymerization Inhibition in Breast Cancer; Design, Synthesis and Molecular Docking**

Heba Abdelmegeed <sup>a</sup>, Lina M. A. Abdel Ghany <sup>b</sup>, Amira Youssef <sup>c</sup>, Abd-Allah S. El-Etrawy <sup>c,d</sup>,  
Noha Ryad <sup>c</sup>

<sup>a</sup> *Chemistry of Natural Compounds Department, Pharmaceutical and Drug Industries Research Institute, National Research Centre, Giza 12622, Egypt.*

<sup>b</sup> *Pharmaceutical Chemistry Department, College of Pharmaceutical Sciences and Drug Manufacturing, Misr University for Science and Technology (MUST), 6th of October City, Giza, P.O. Box 77, Egypt.*

<sup>c</sup> *Pharmaceutical Organic Chemistry Department, College of Pharmaceutical Sciences and Drug Manufacturing, Misr University for Science and Technology (MUST), 6th of October City, Giza, P.O. Box 77, Egypt.*

<sup>d</sup> *Department of Chemistry, Basic Science, Misr University for Science and Technology (MUST), 6th of October City, Giza, P.O. Box 77, Egypt.*

---

\* Corresponding author: Lina M. A. Abdel Ghany

**Email:**

[Lina.ameen@must.edu.eg](mailto:Lina.ameen@must.edu.eg)

## Supplementary data:

The data are divided into three parts; chemistry, biological studies, and docking studies.

### Chemicals and reagents:

Solvents and reagents were obtained from Aldrich and were used without further purification unless otherwise indicated. Melting points were determined by the open capillary tube method using the Stuart SMP10 melting point apparatus and were uncorrected. The elemental analysis was carried out by Thermo Scientific™ FLASH 2000 CHNS/O analyzer, by Thermo Fisher Scientific at The Regional Center for Mycology and Biotechnology, Al-Azhar University, Egypt. Infrared Spectra were recorded as potassium bromide discs on Bruker FT-IR spectrophotometer, MUST university and expressed in wave number  $\nu_{\max}$  ( $\text{cm}^{-1}$ ).  $^1\text{H}$  NMR spectra were performed on Bruker 400 MHz spectrophotometer using TMS as internal standard, chemical shifts( $\delta$ ) were recorded in ppm on  $\delta$  scale at Ain Shams University, Egypt.  $^{13}\text{C}$  NMR spectra were carried out using Bruker 100 MHz using TMS as internal standard, chemical shifts ( $\delta$ ) were recorded in ppm on  $\delta$  scale at Ain Shams University, Egypt. Mass spectra were run on Hewlett Packard 5988 spectrometer or Shimadzu QP-2010 plus at The Regional Center for Mycology & Biotechnology, Al-Azhar University, Egypt. Progress of the reactions was monitored by TLC using precoated aluminum sheets silica gel (Merck 60 F<sub>254</sub>) using chloroform:methanol (9.5:0.5) as the eluting system and was visualized by UV lamp.

## Spectral data:

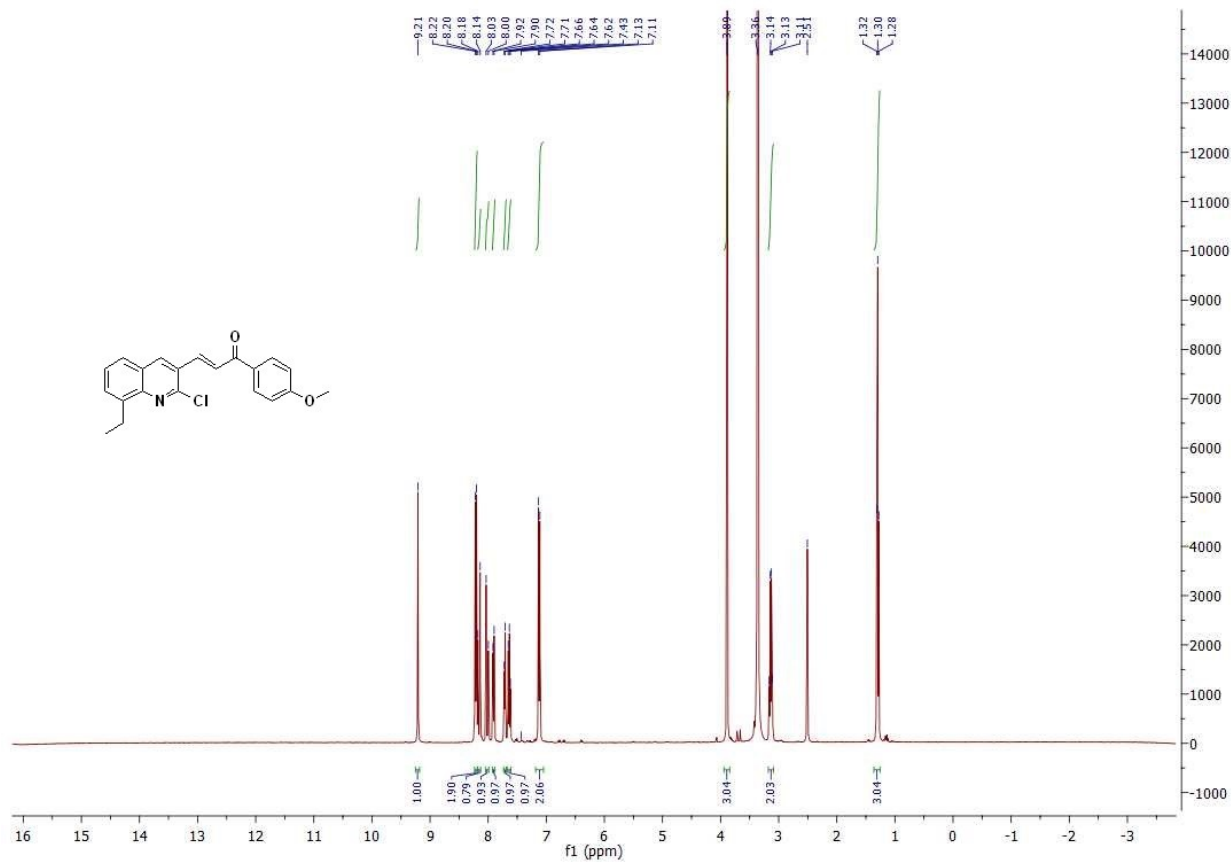

**Fig. S1:**  $^1\text{H}$  NMR (400 MHz,  $\text{DMSO-}d_6$ ), spectrum of the compound **3a**.

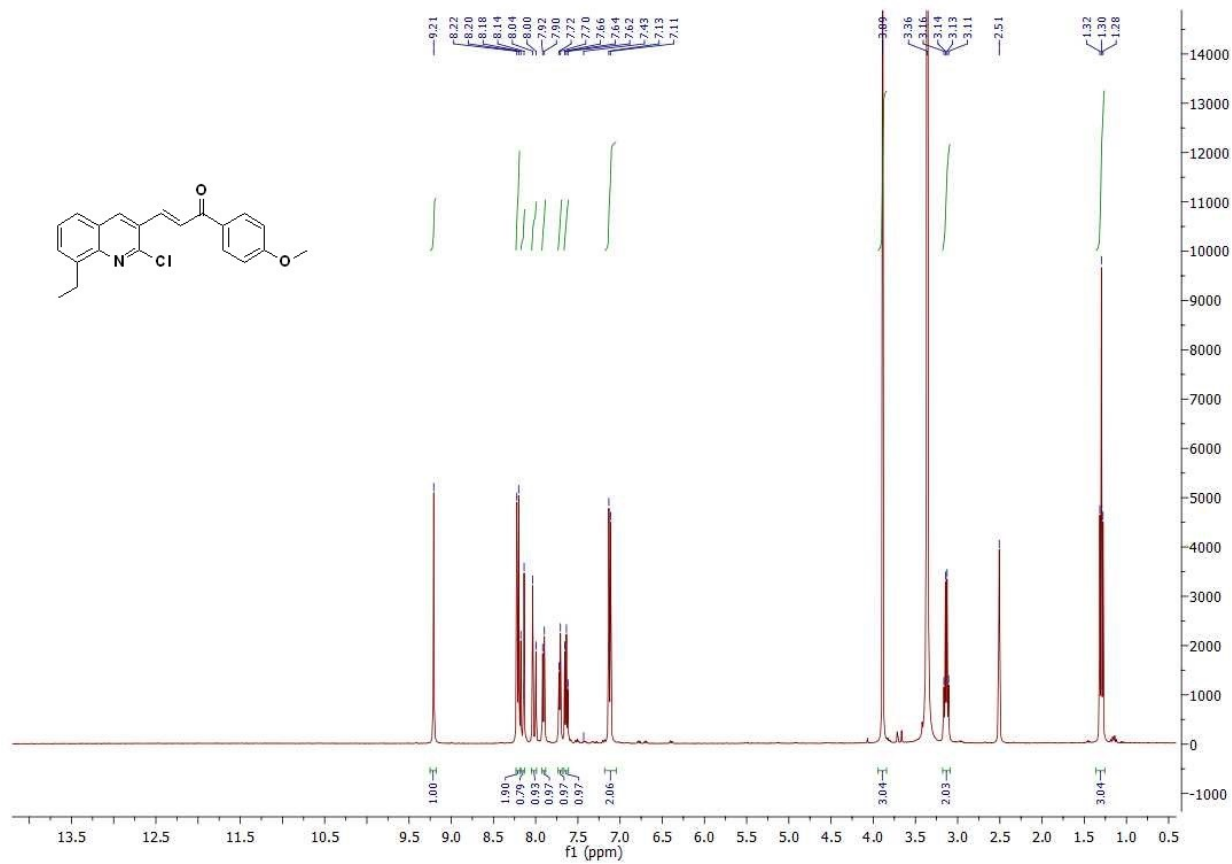

**Fig. S2:** <sup>1</sup>H NMR (400 MHz, DMSO-*d*<sub>6</sub>) magnified spectrum of the compound **3a**.

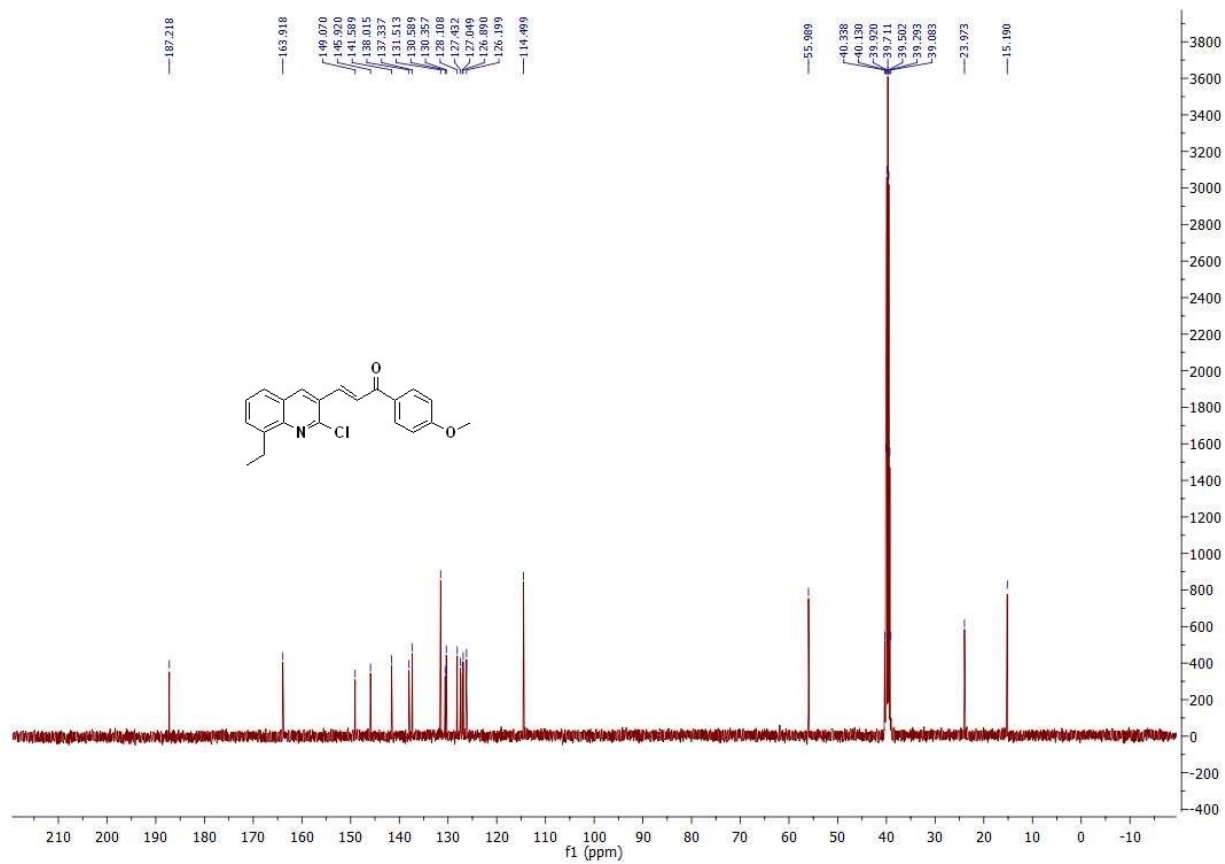

**Fig. S3:**  $^{13}\text{C}$  NMR (100 MHz,  $\text{DMSO-}d_6$ ) spectrum of the compound **3a**.

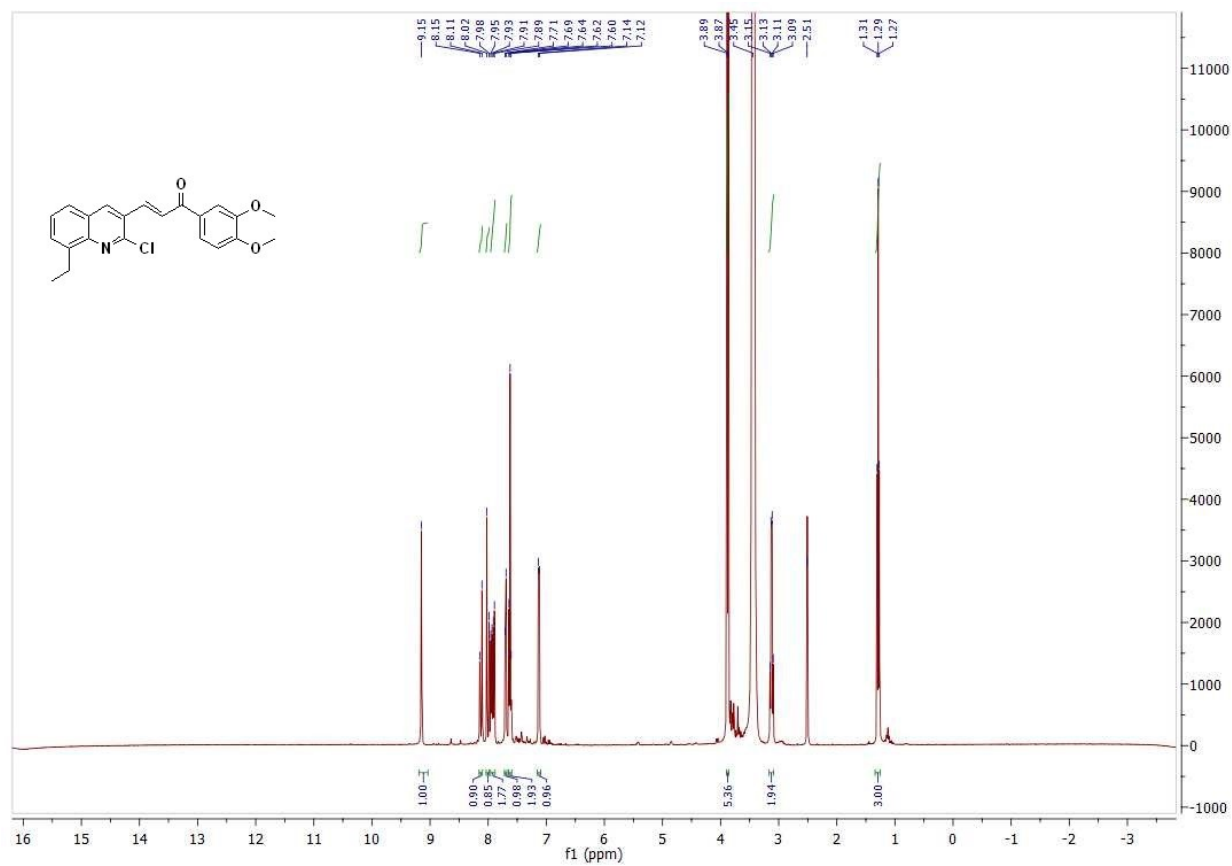

**Fig. S4:**  $^1\text{H NMR}$  (400 MHz,  $\text{DMSO-}d_6$ ) spectrum of the compound **3b**.

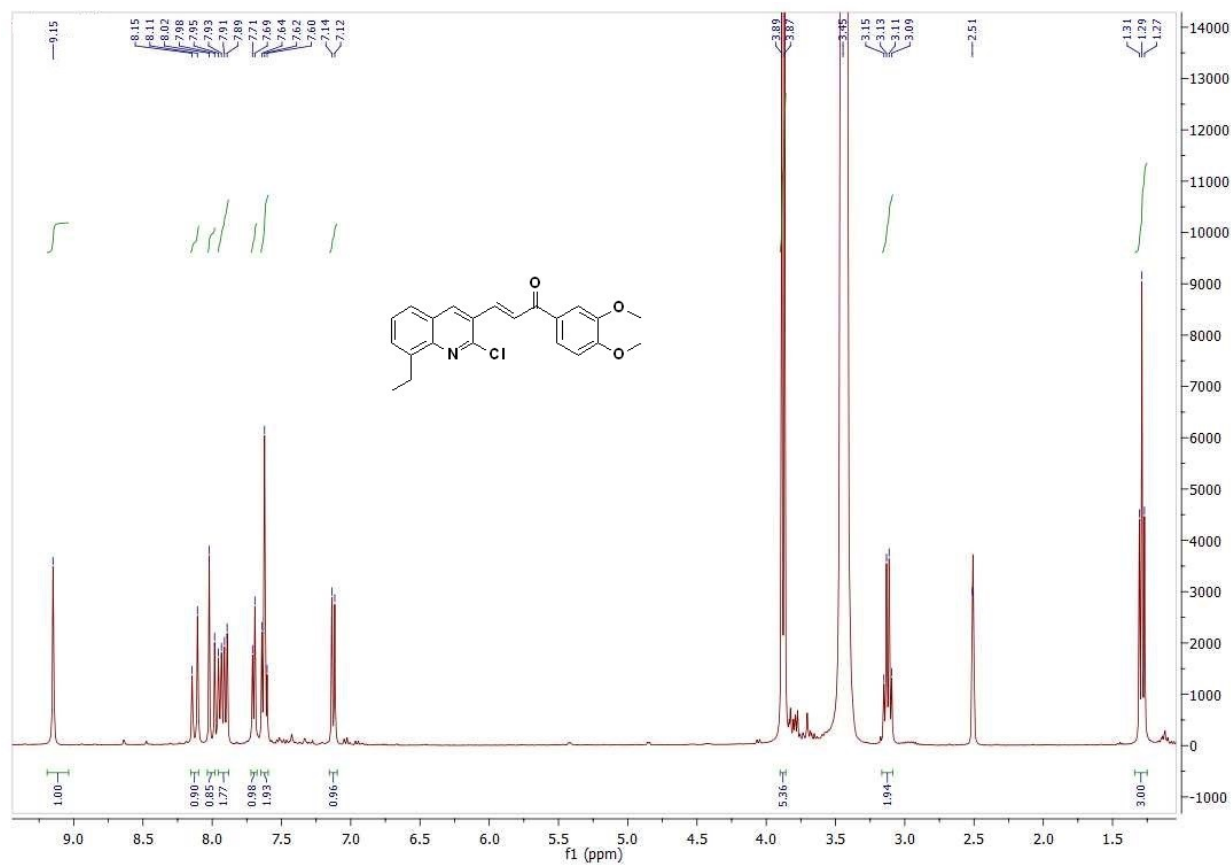

**Fig. S5:**  $^1\text{H}$  NMR (400 MHz,  $\text{DMSO-}d_6$ ) magnified spectrum of the compound **3b**.

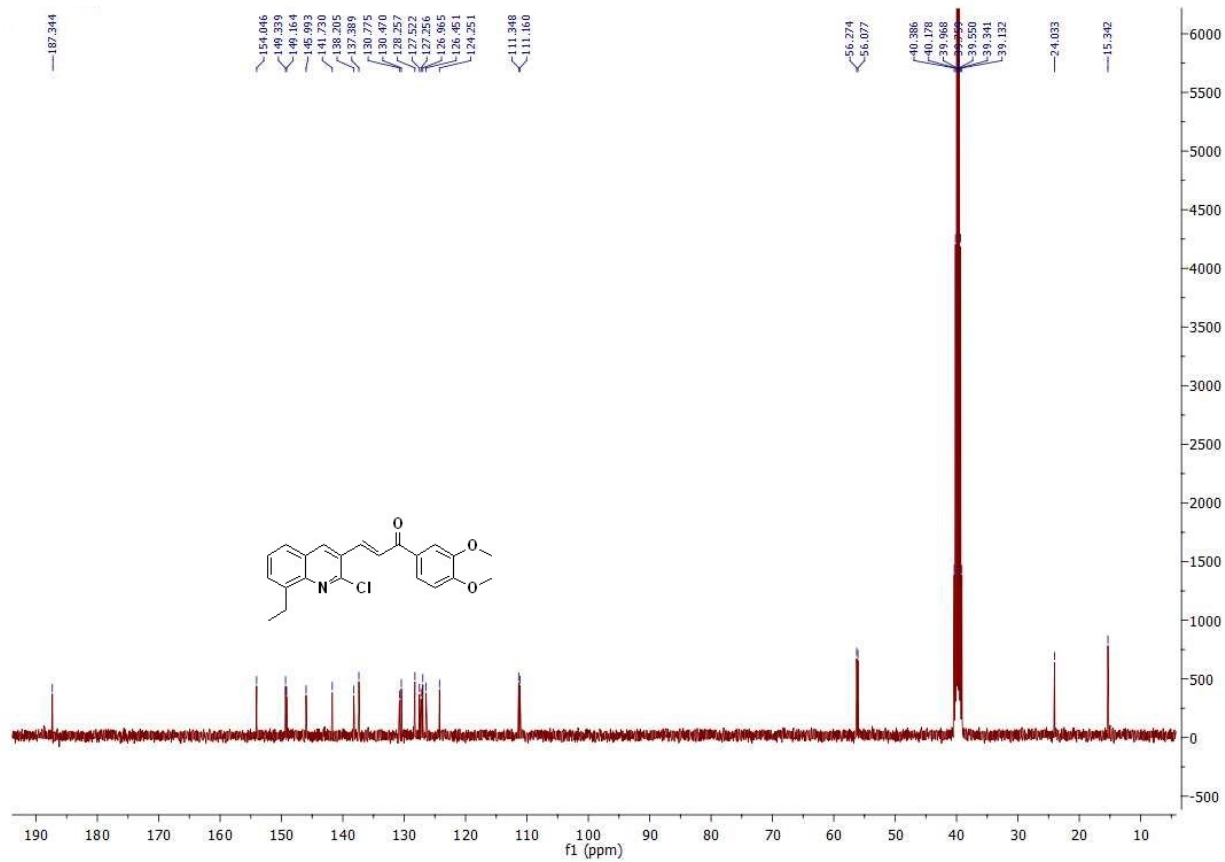

**Fig. S6:** <sup>13</sup>C NMR (100 MHz, DMSO-*d*<sub>6</sub>) spectrum of the compound **3b**.



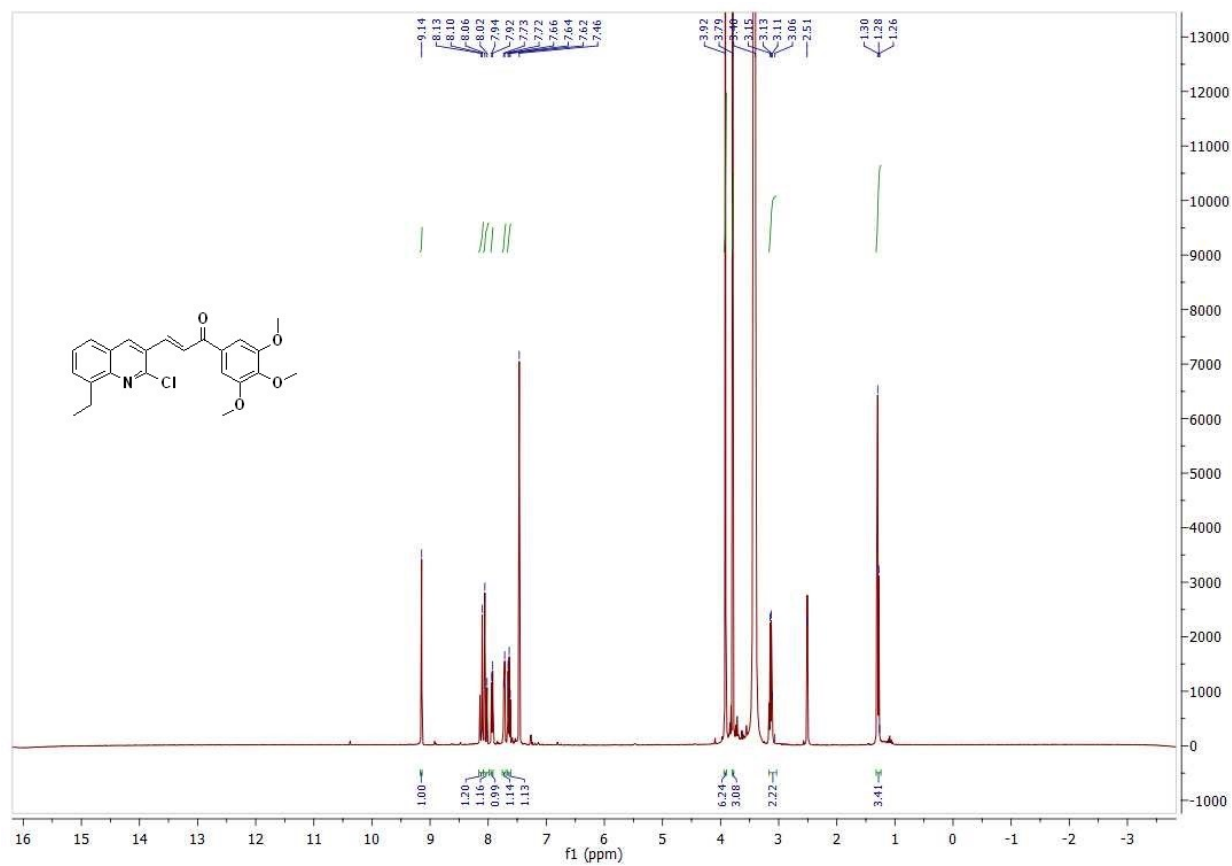

**Fig. S7:**  $^1\text{H}$  NMR (400 MHz,  $\text{DMSO-}d_6$ ) spectrum of the compound **3c**.

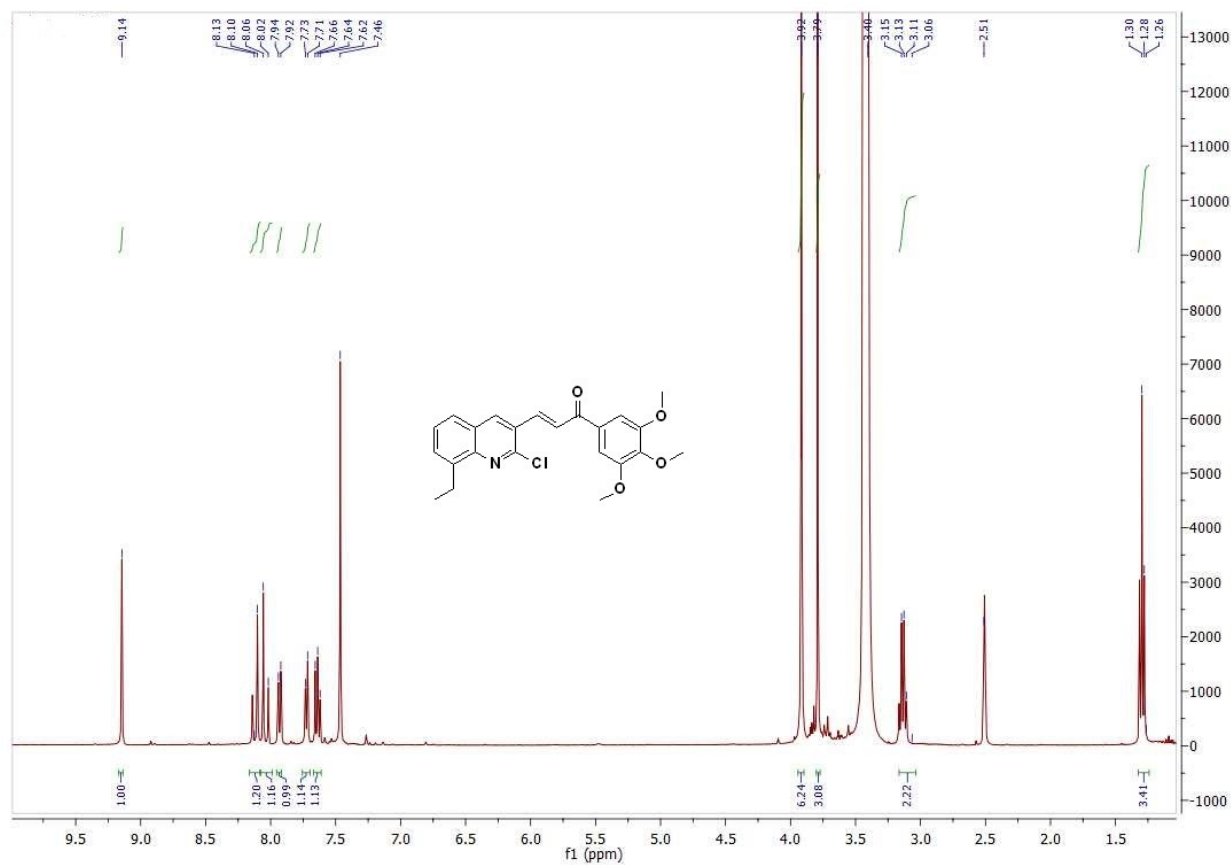

**Fig. S8:** <sup>1</sup>H NMR (400 MHz, DMSO-*d*<sub>6</sub>) magnified spectrum of the compound **3c**.

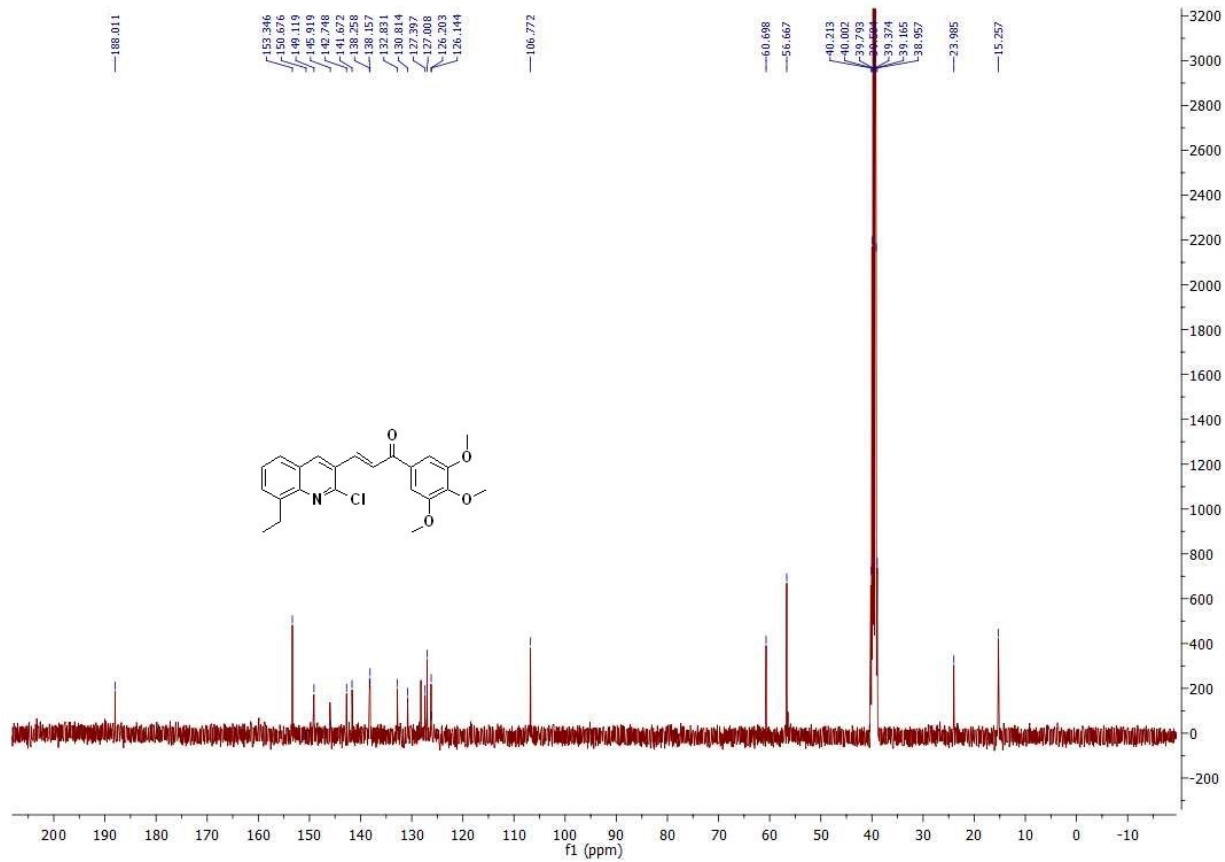

**Fig. S9:**  $^{13}\text{C}$  NMR (100 MHz,  $\text{DMSO-}d_6$ ) spectrum of the compound **3c**.

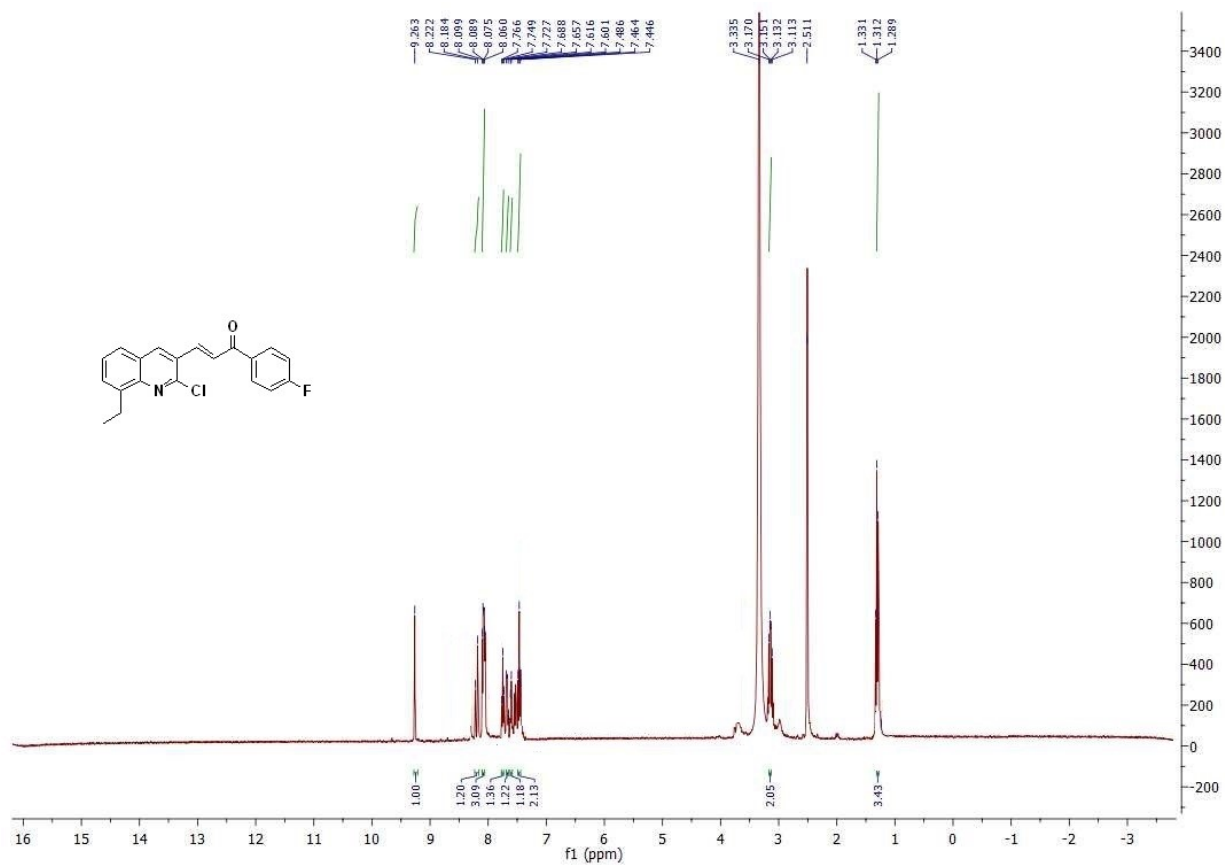

**Fig. S10:**  $^1\text{H}$  NMR (400 MHz,  $\text{DMSO-}d_6$ ) spectrum of the compound **3d**.

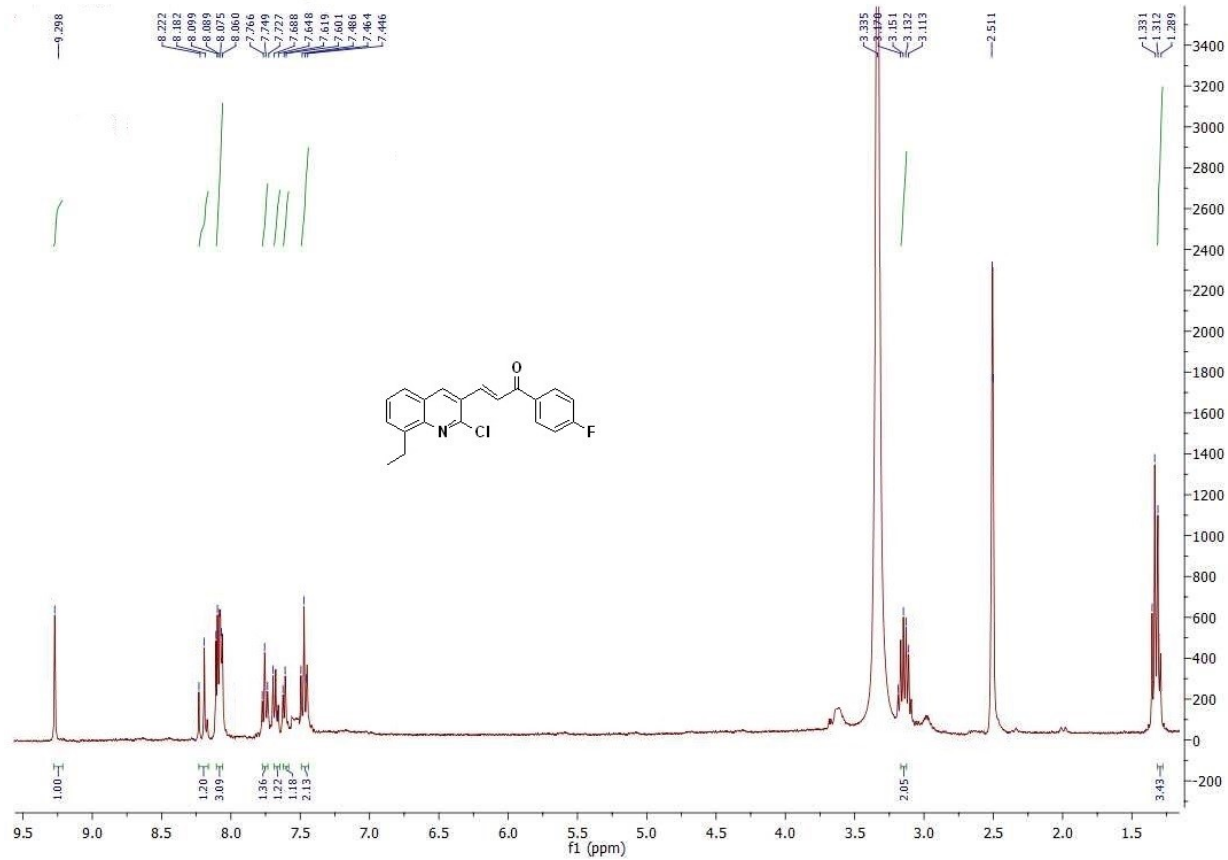

**Fig. S11:**  $^1\text{H}$  NMR (400 MHz,  $\text{DMSO}-d_6$ ) magnified spectrum of the compound **3d**.

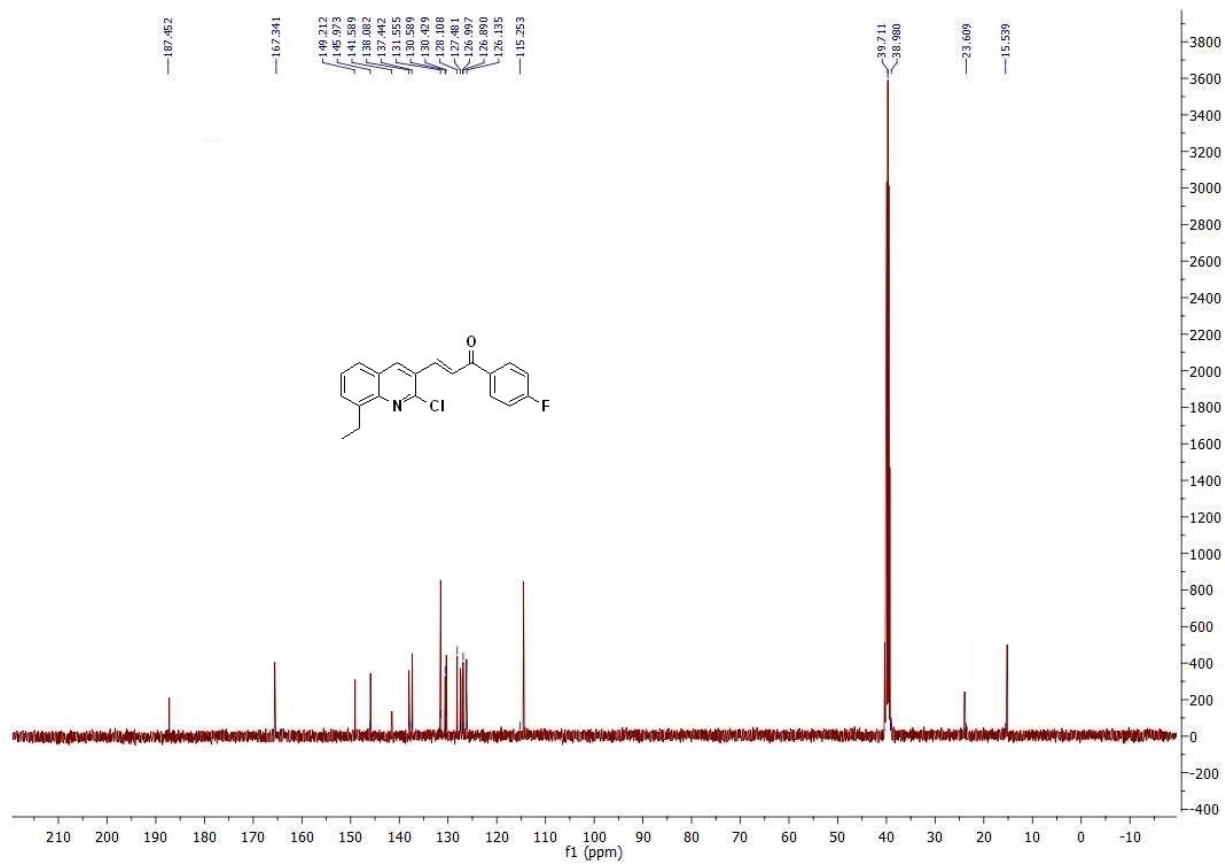

**Fig. S12:**  $^{13}\text{C}$  NMR (100 MHz,  $\text{DMSO-}d_6$ ) spectrum of the compound **3d**.

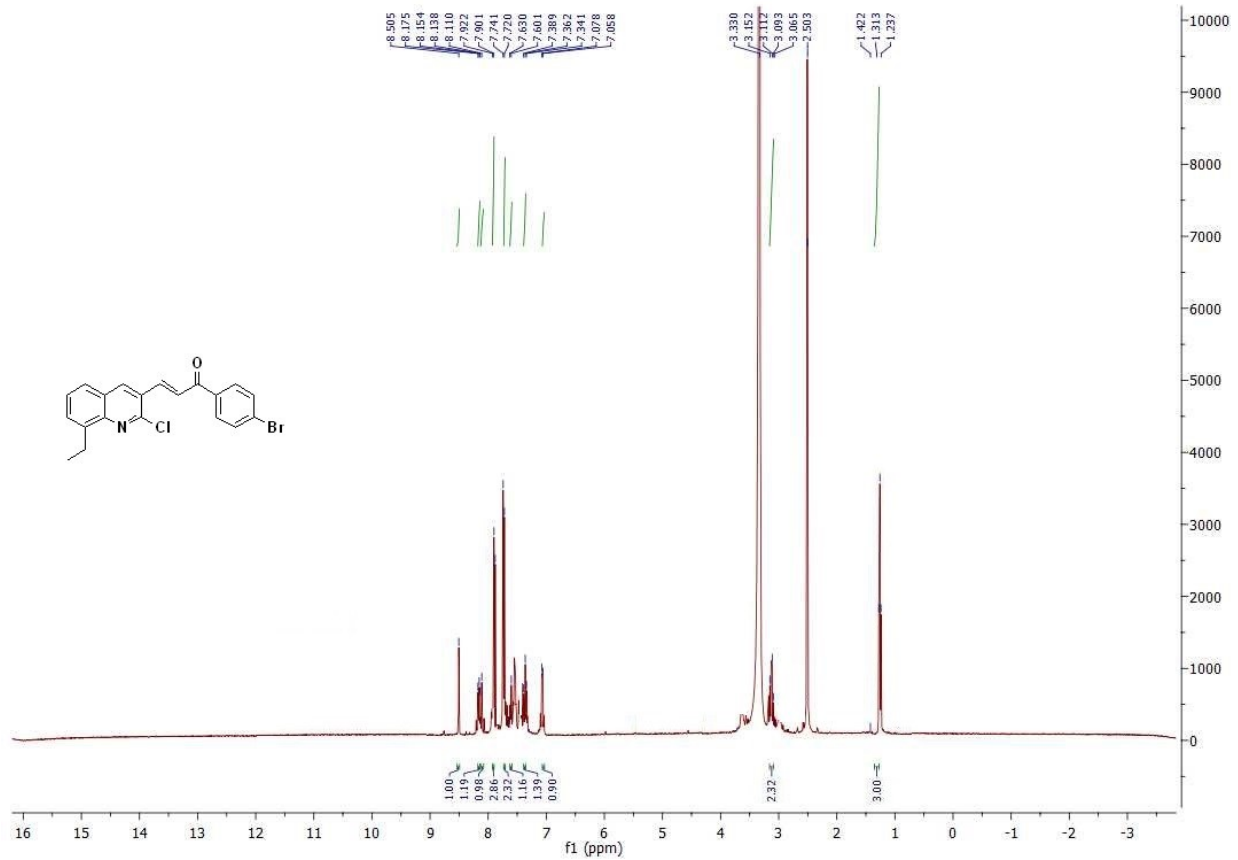

Fig. S13:  $^1\text{H}$  NMR (400 MHz,  $\text{DMSO}-d_6$ ) magnified spectrum of the compound 3e.

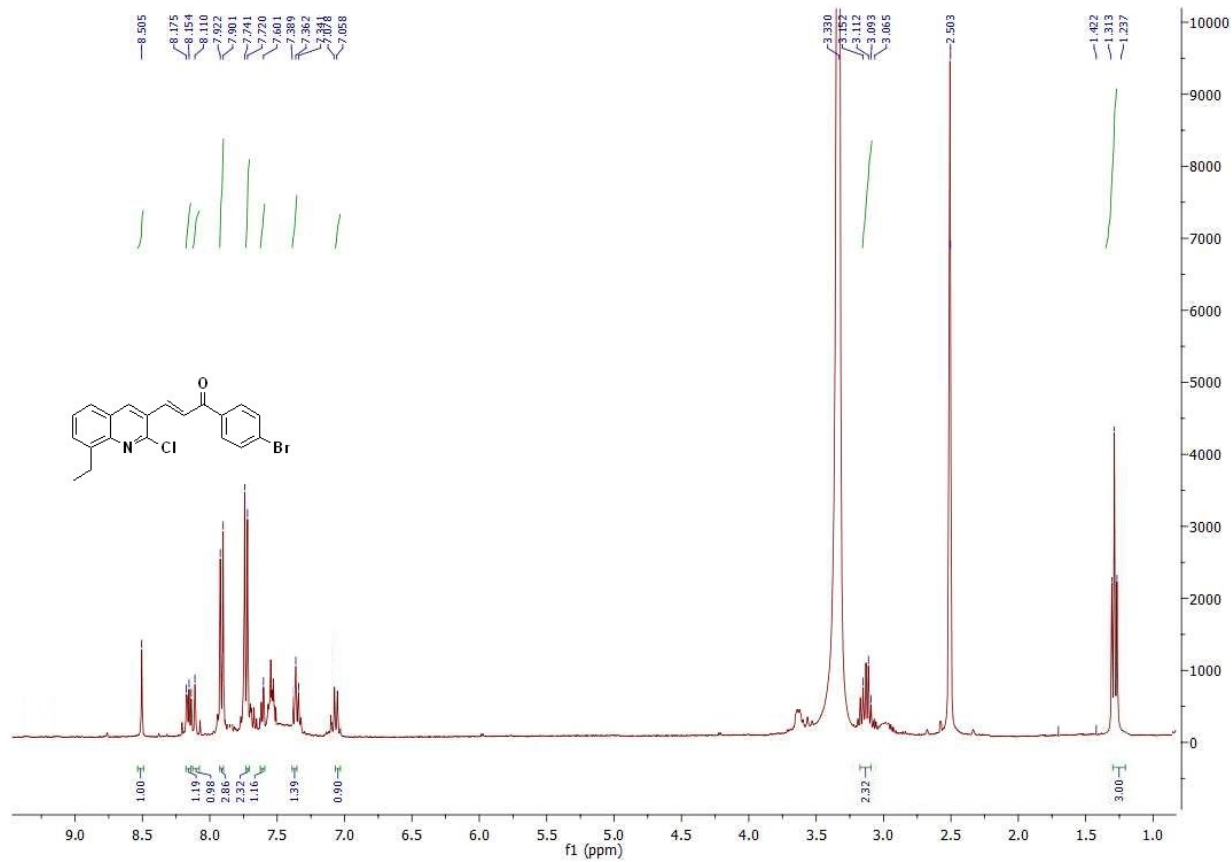

**Fig. S14:**  $^1\text{H}$  NMR (400 MHz,  $\text{DMSO-}d_6$ ) magnified spectrum of the compounds **3e**.



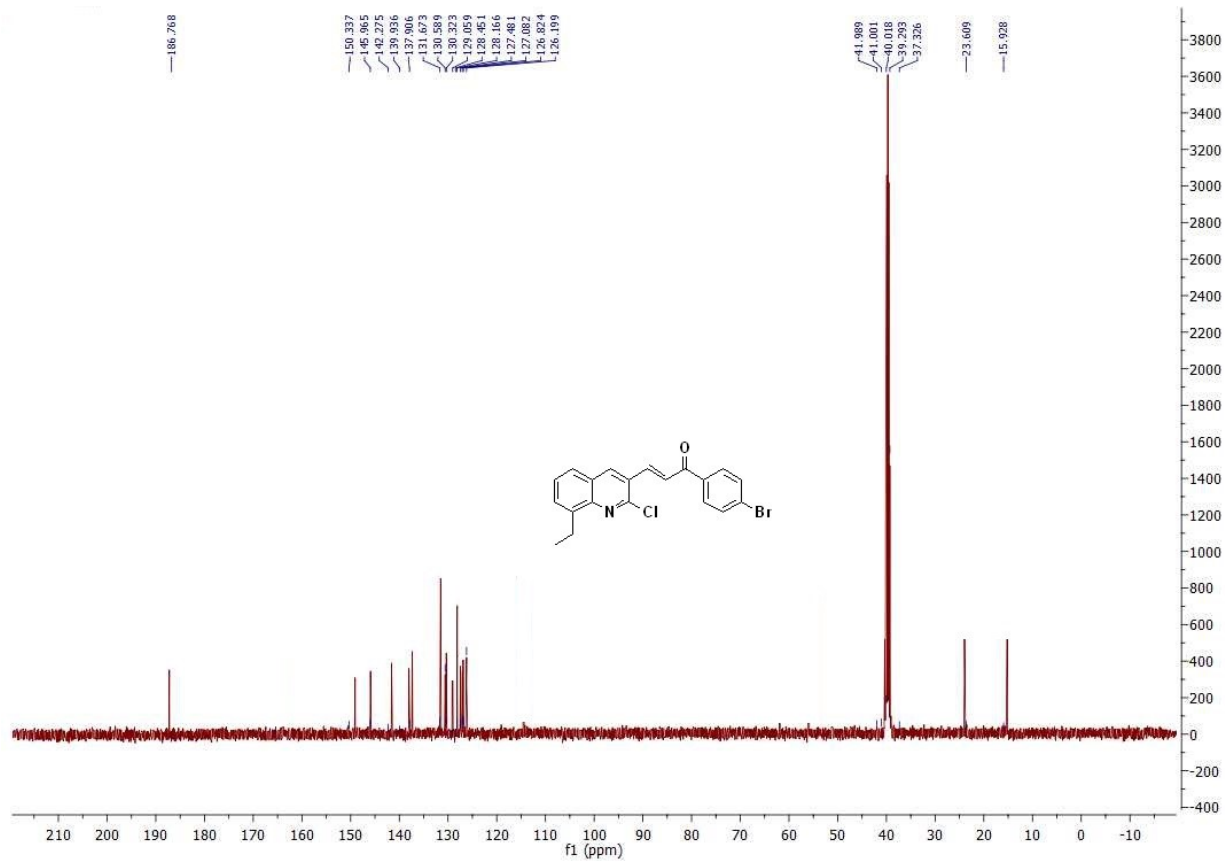

**Fig. S15:**  $^{13}\text{C}$  NMR (100 MHz,  $\text{DMSO-}d_6$ ) spectrum of the compound **3e**.

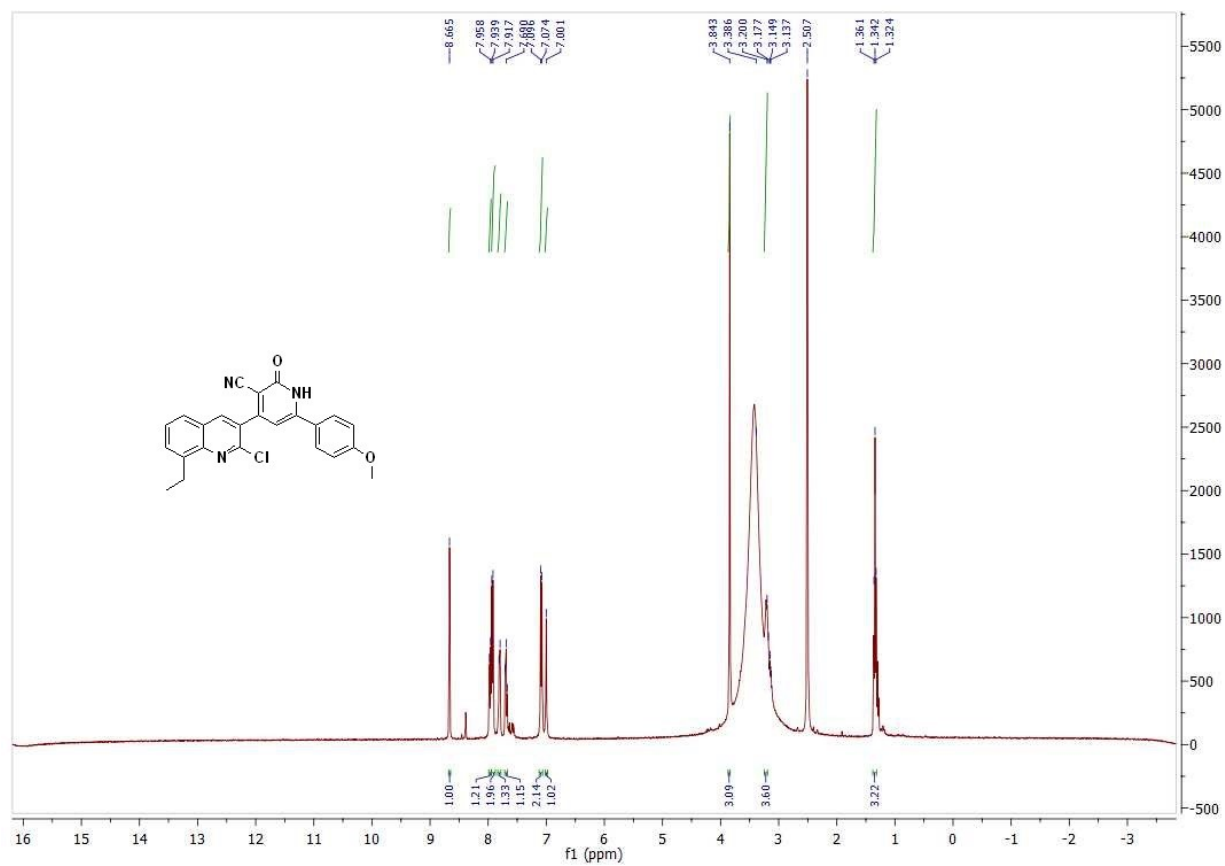

**Fig. S16:**  $^1\text{H}$  NMR (400 MHz,  $\text{DMSO-}d_6$ ) spectrum of the compound **4a**.

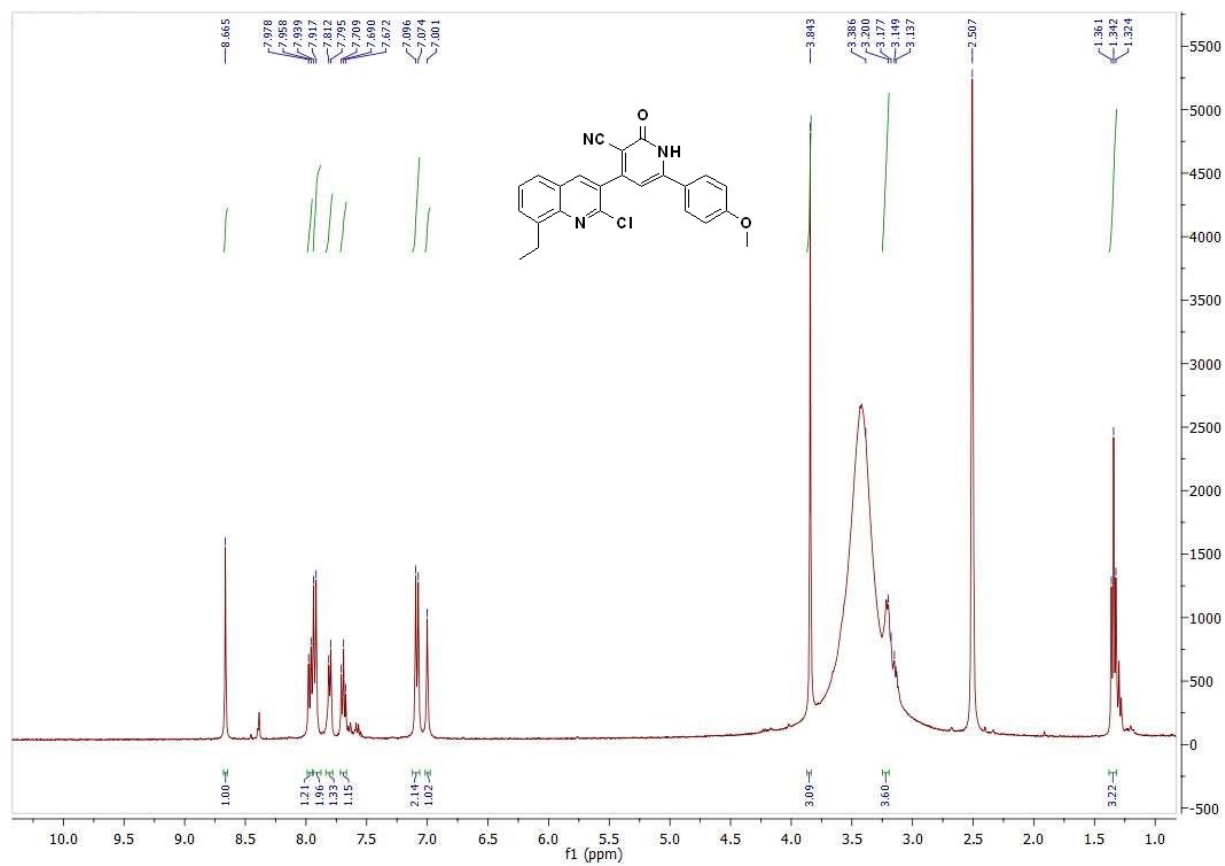

**Fig. S17:**  $^1\text{H NMR}$  (400 MHz,  $\text{DMSO-}d_6$ ) magnified spectrum of the compound **4a**.

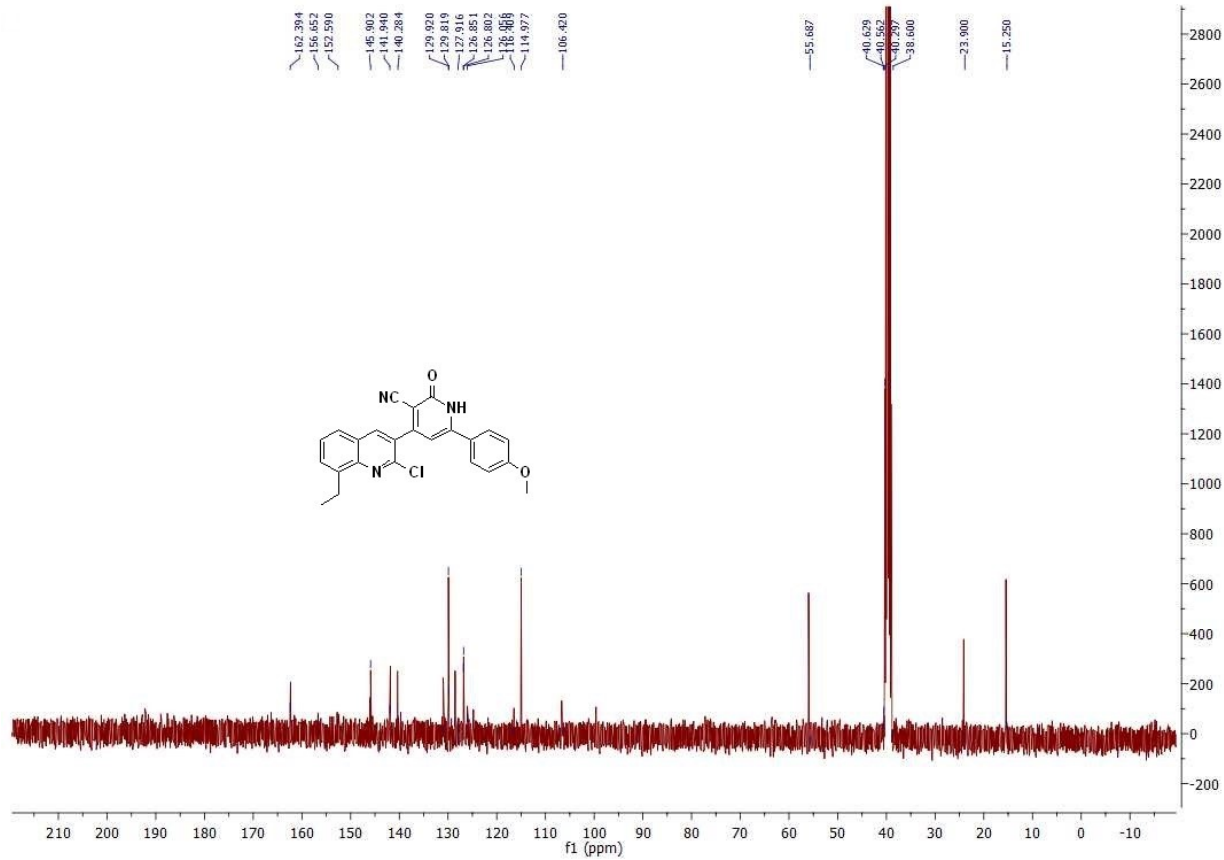

**Fig. S18:** <sup>13</sup>C NMR (100 MHz, DMSO-*d*<sub>6</sub>) spectrum of the compound 4a.

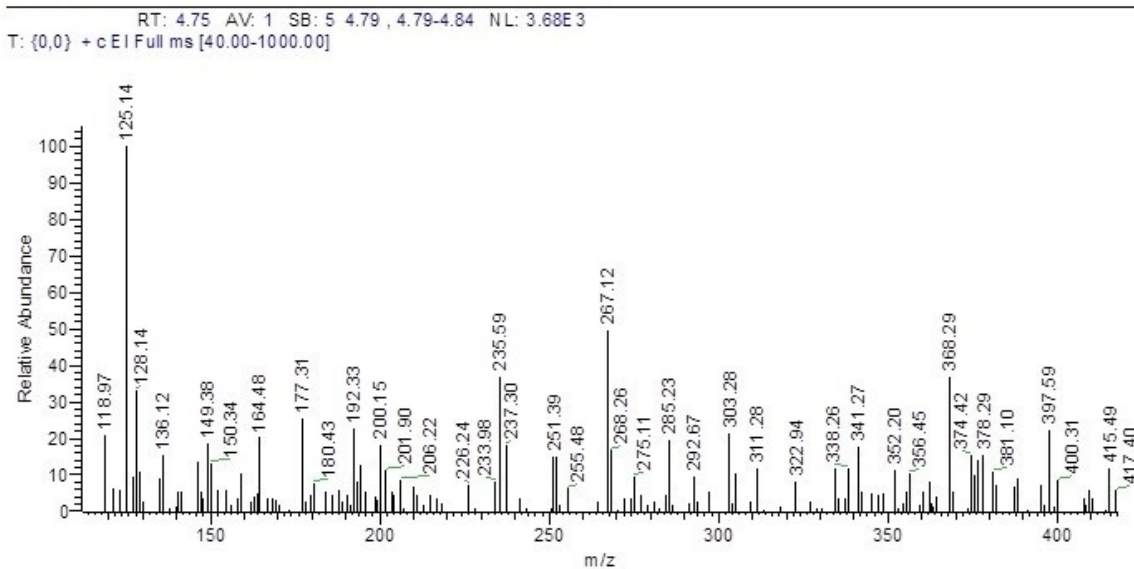

**Fig. S19:** MS of the compound 4a.

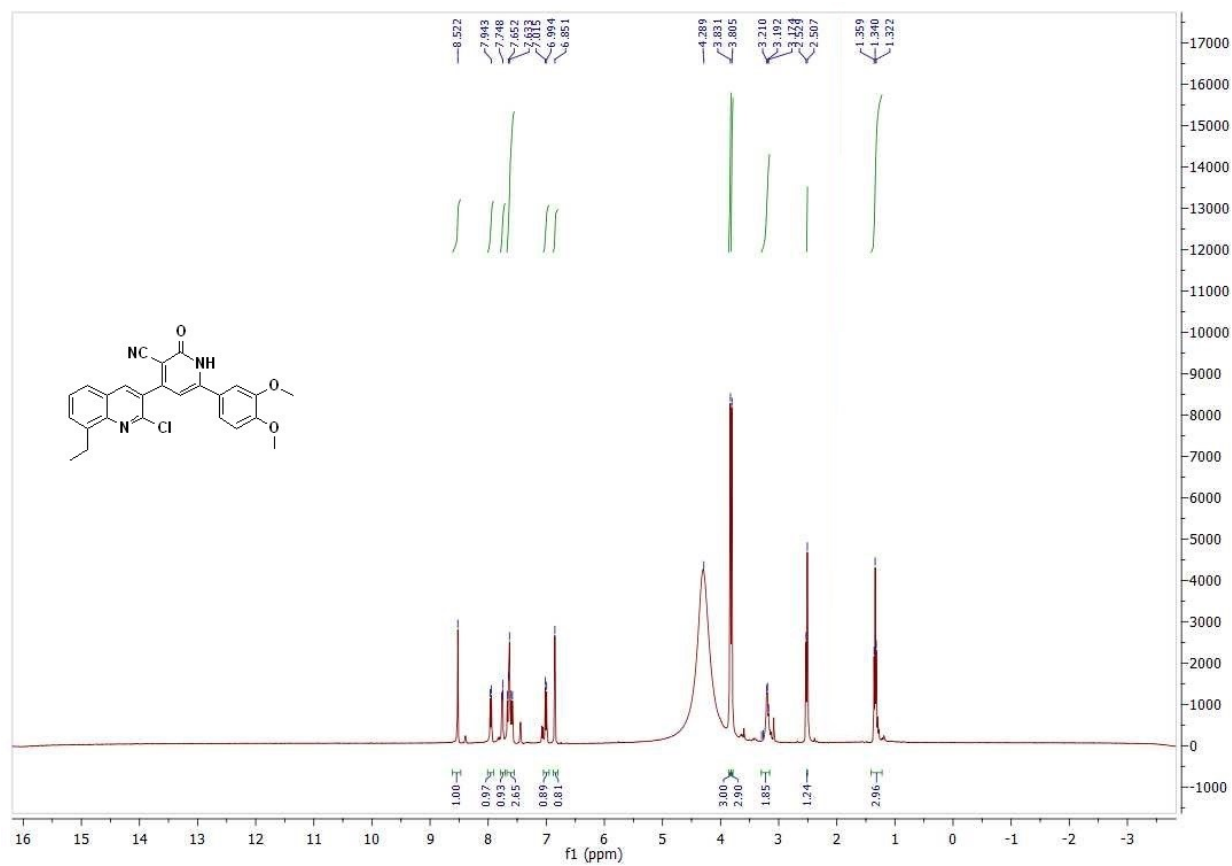

**Fig. S20:**  $^1\text{H}$  NMR (400 MHz,  $\text{DMSO-}d_6$ ) spectrum of the compound **4b**.

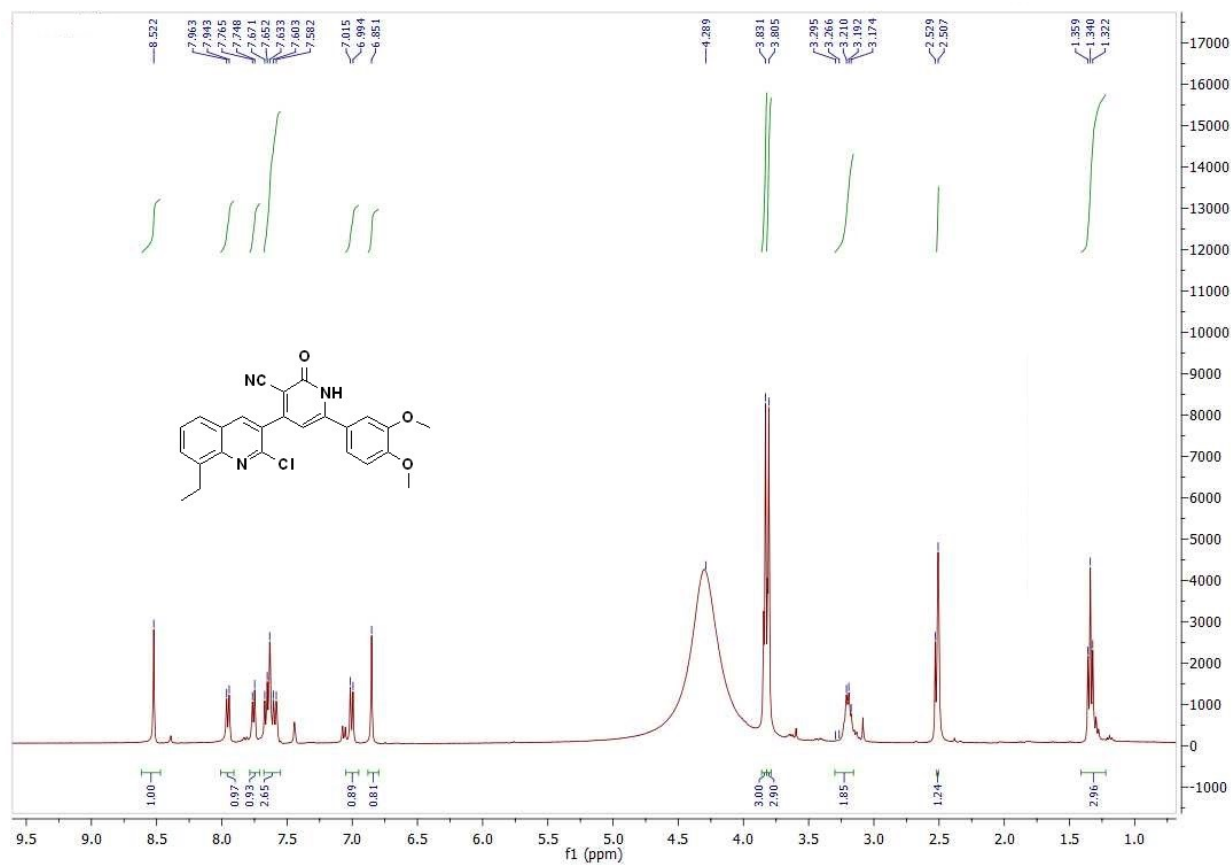

**Fig. S21:**  $^1\text{H}$  NMR (400 MHz,  $\text{DMSO-}d_6$ ) magnified spectrum of the compound **4b**.

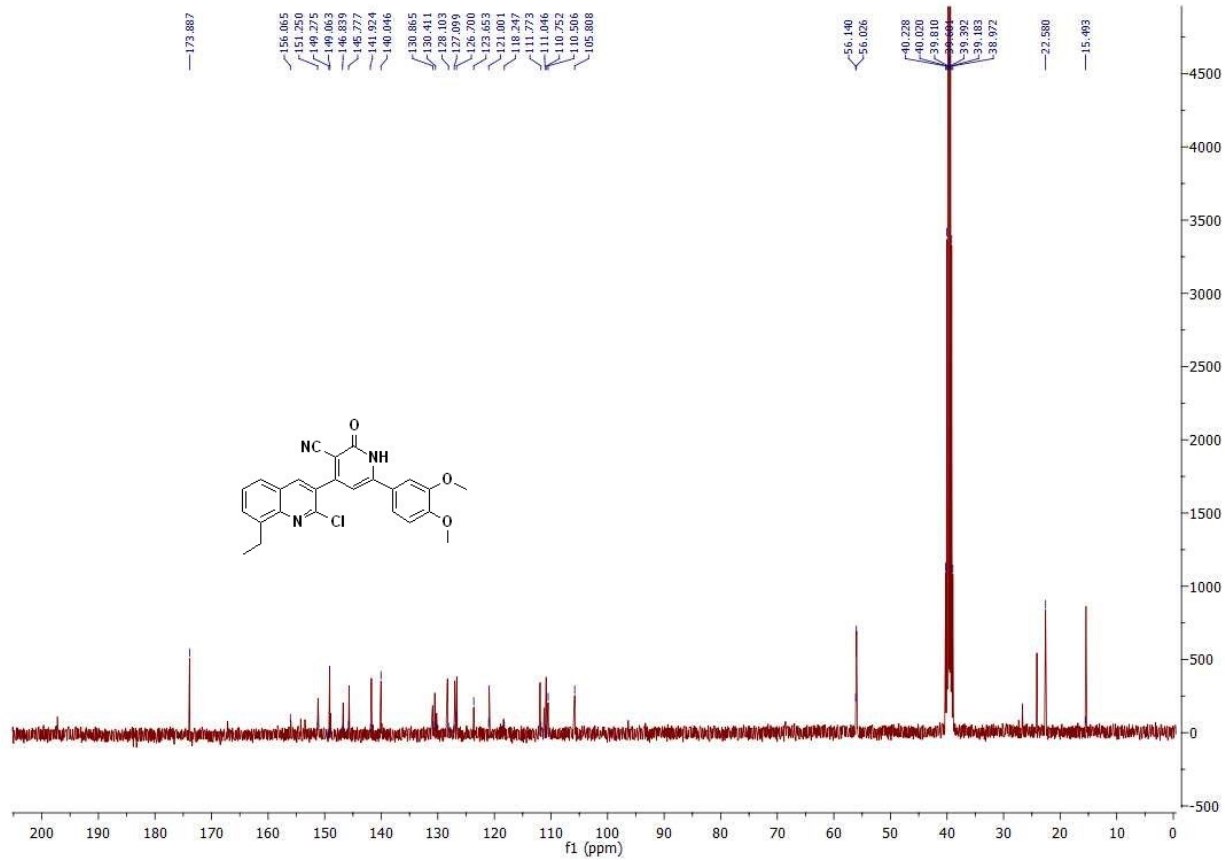

Fig. S22: <sup>13</sup>C NMR (100 MHz, DMSO-*d*<sub>6</sub>) spectrum of the compound 4b.

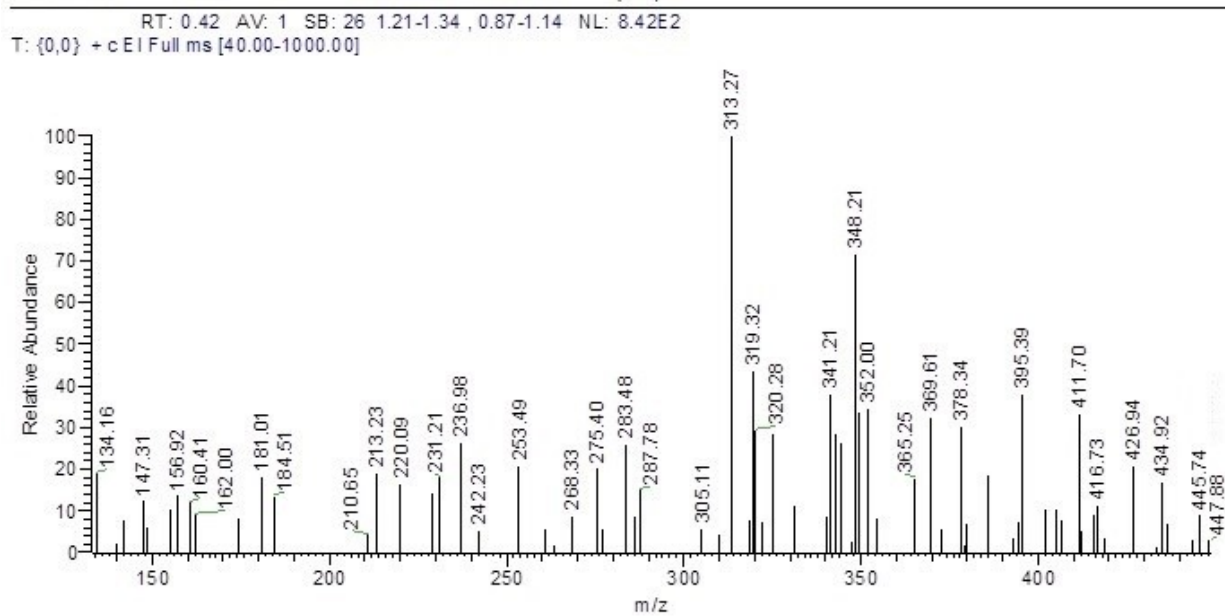

Fig. S23: MS of the compound 4b.

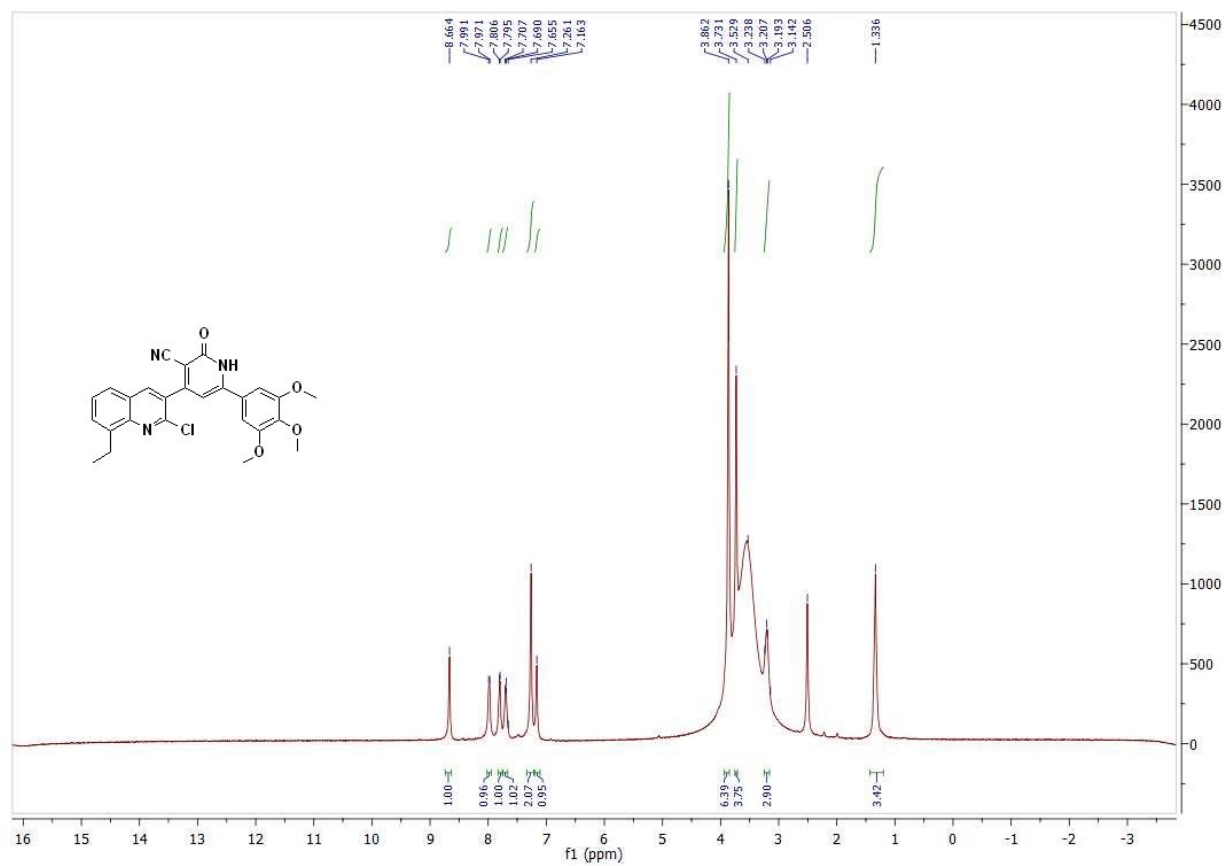

**Fig. S24:** <sup>1</sup>H NMR (400 MHz, DMSO-*d*<sub>6</sub>) spectrum of the compound **4c**.



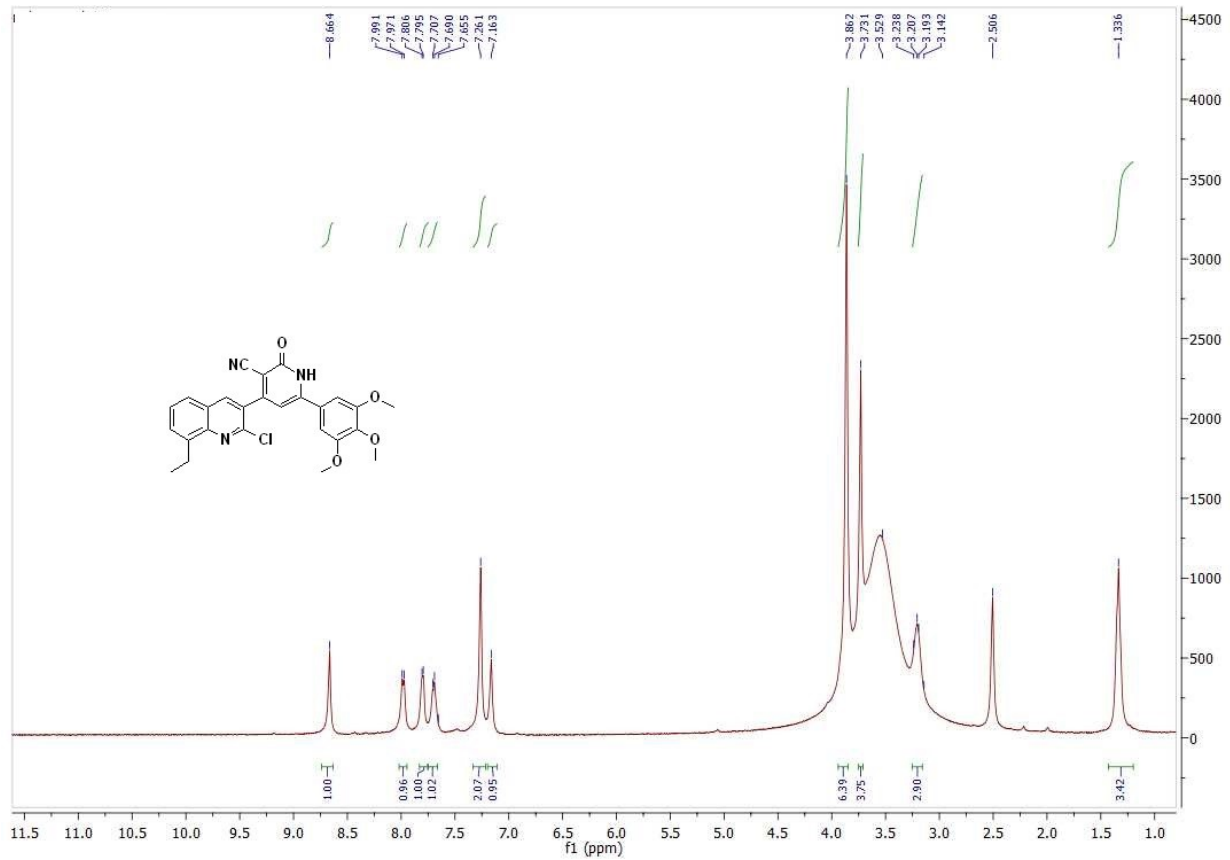

**Fig. S25:**  $^1\text{H}$  NMR (400 MHz,  $\text{DMSO-}d_6$ ) magnified spectrum of the compound **4c**.

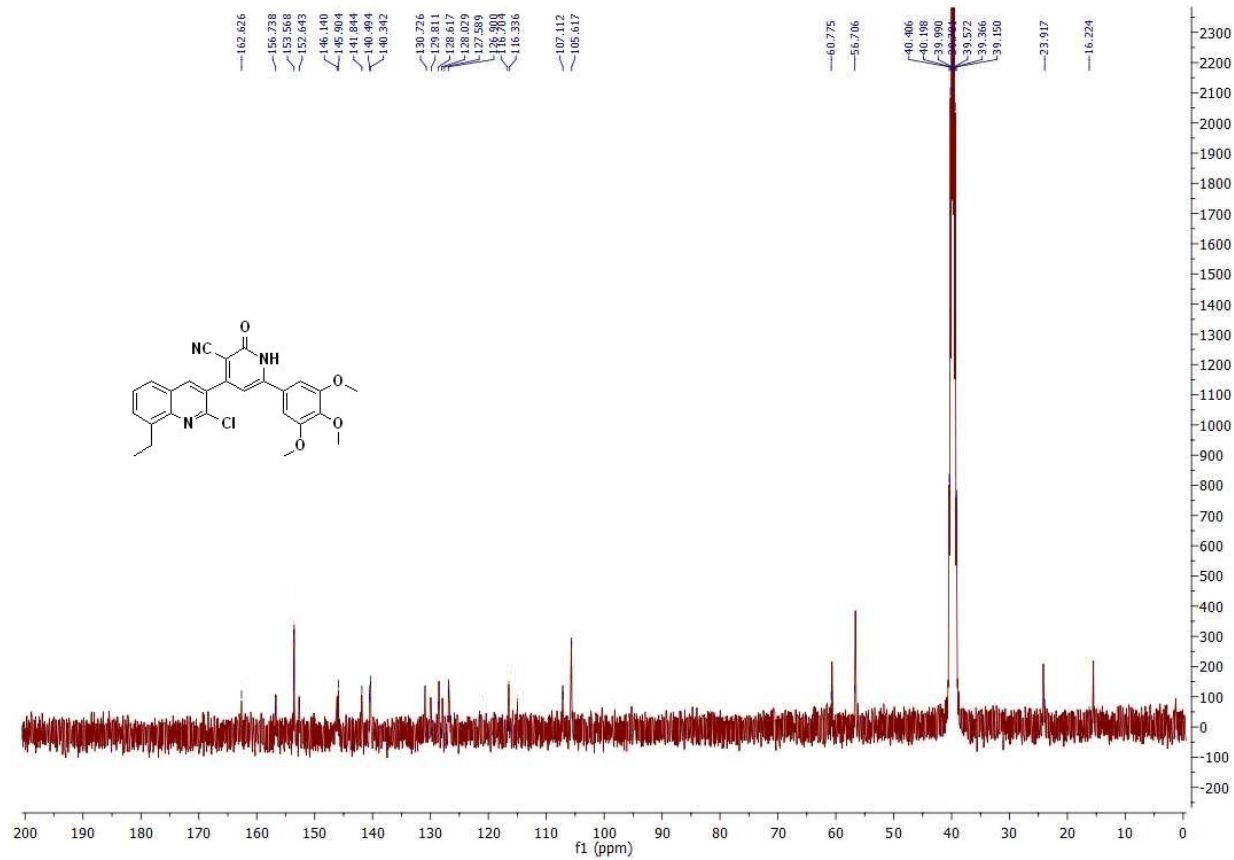

**Fig. S26:** <sup>13</sup>C NMR (100 MHz, DMSO-*d*<sub>6</sub>) spectrum of the compound 4c.

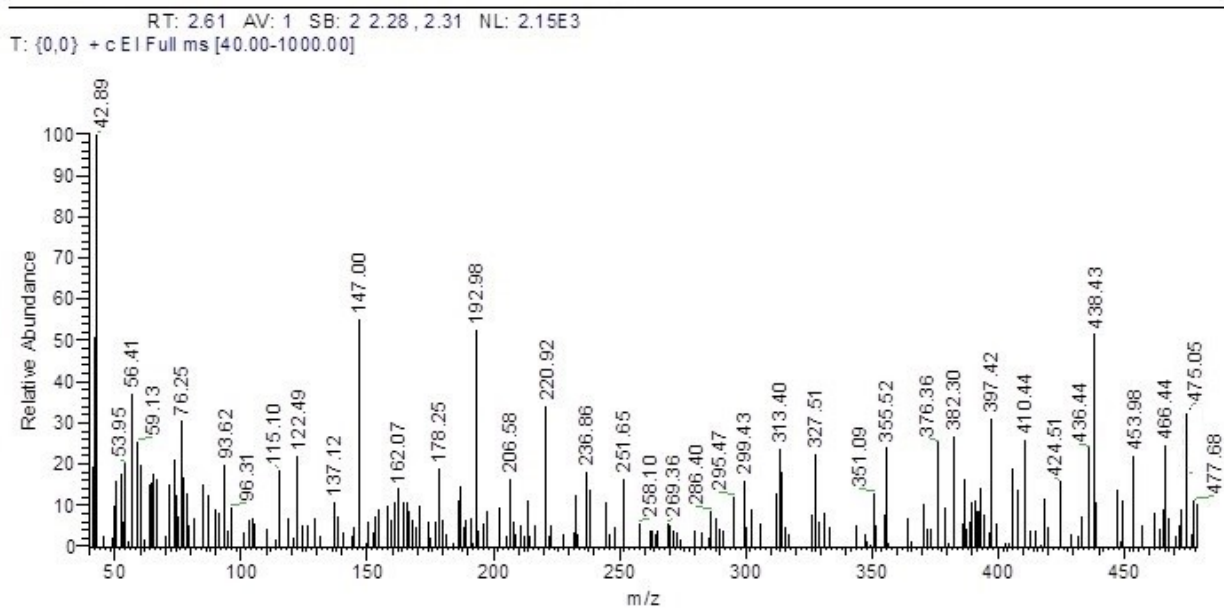

**Fig. S27:** MS of the compound 4c.

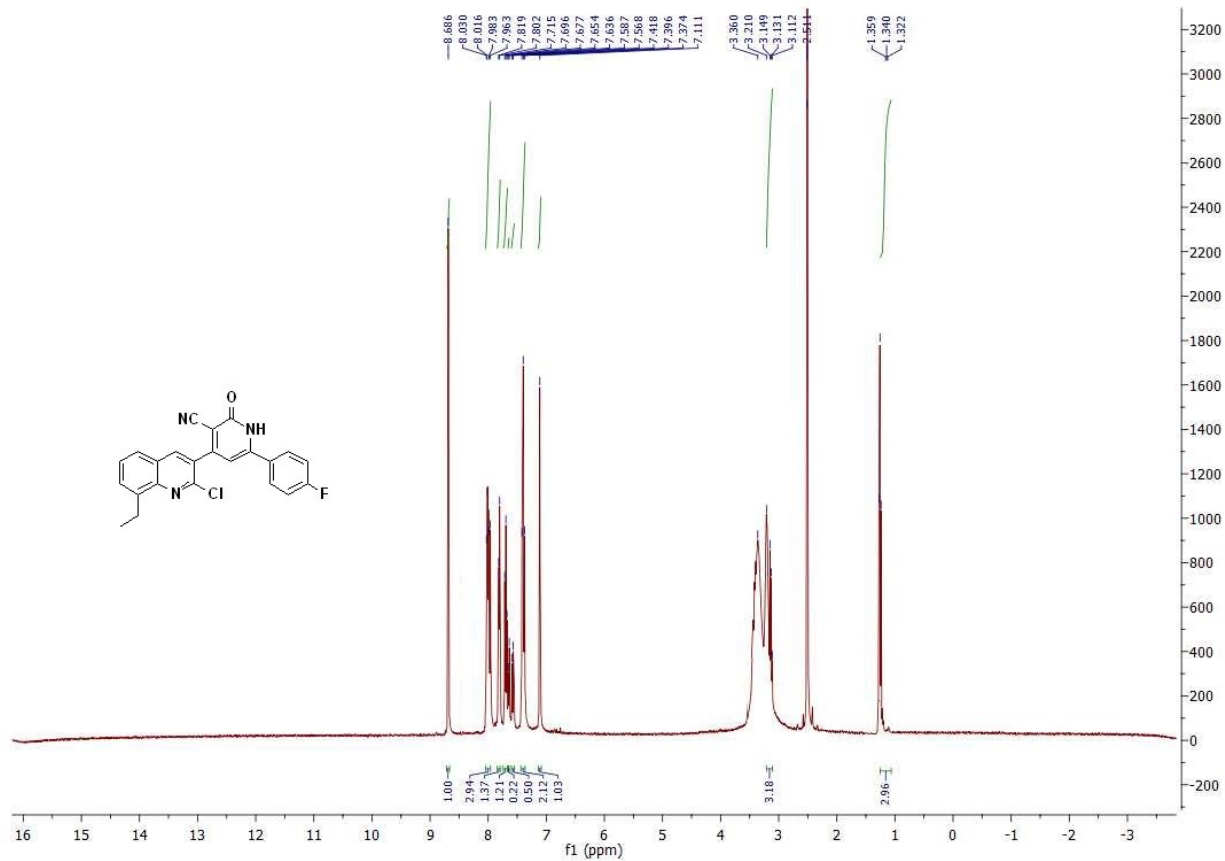

**Fig. S28:**  $^1\text{H NMR}$  (400 MHz,  $\text{DMSO-}d_6$ ) spectrum of the compound **4d**.

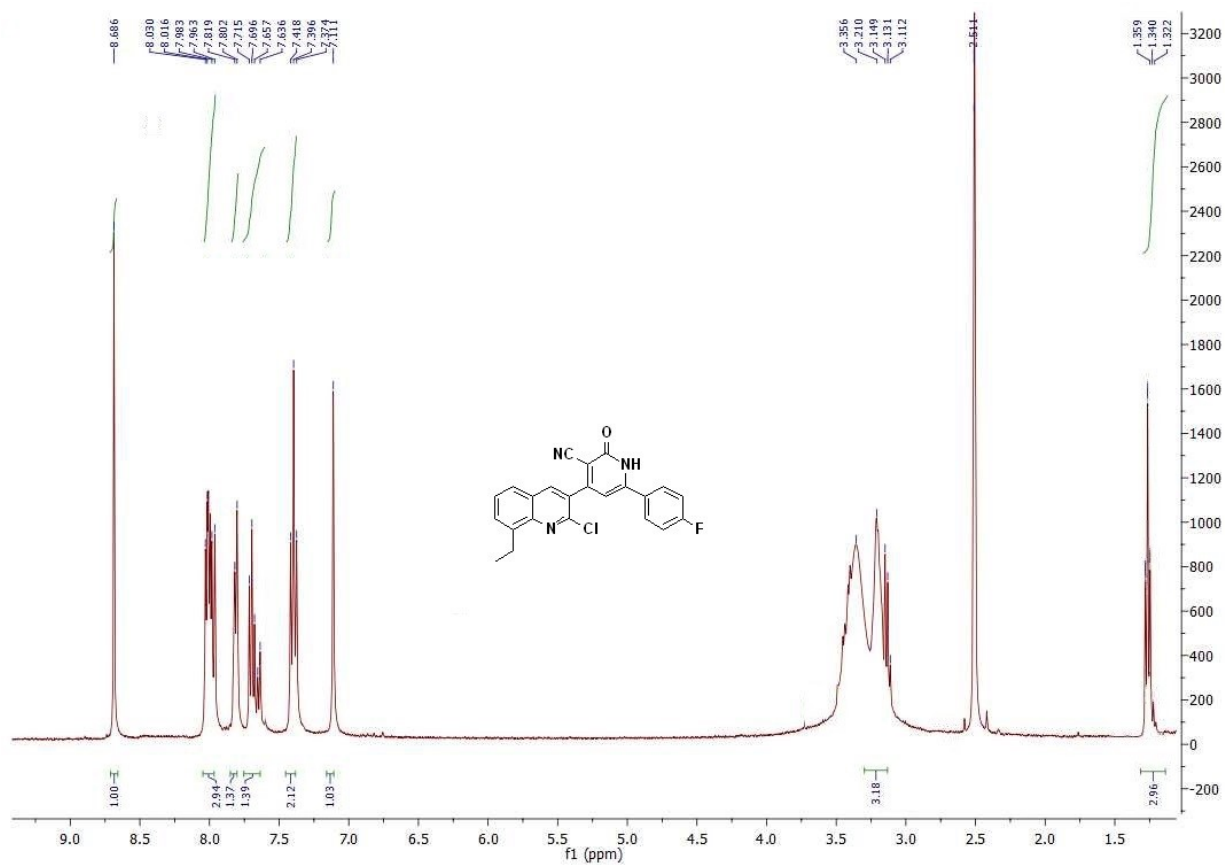

**Fig. S29:**  $^1\text{H}$  NMR (400 MHz,  $\text{DMSO-}d_6$ ) magnified spectrum of the compound **4d**.

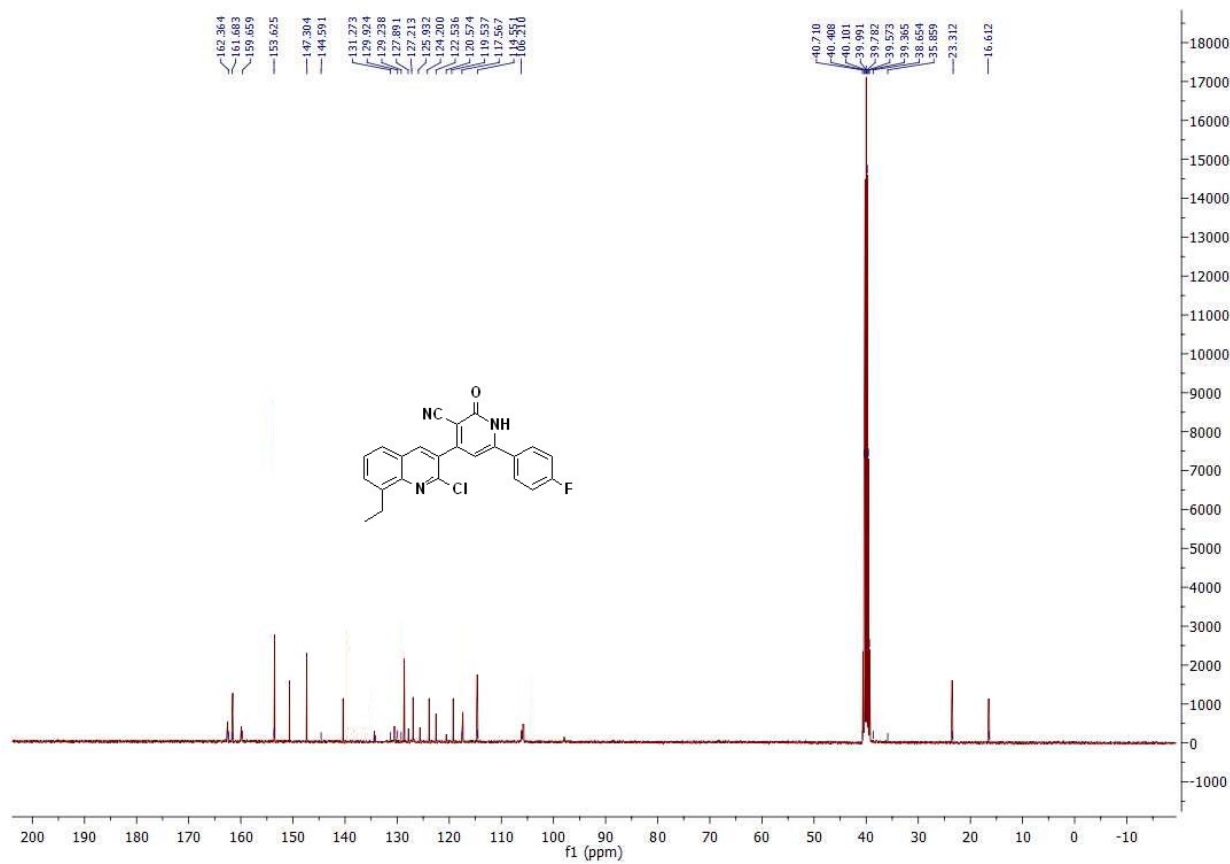

**Fig. S30:** <sup>13</sup>C NMR (100 MHz, DMSO-*d*<sub>6</sub>) spectrum of the compound **4d**.

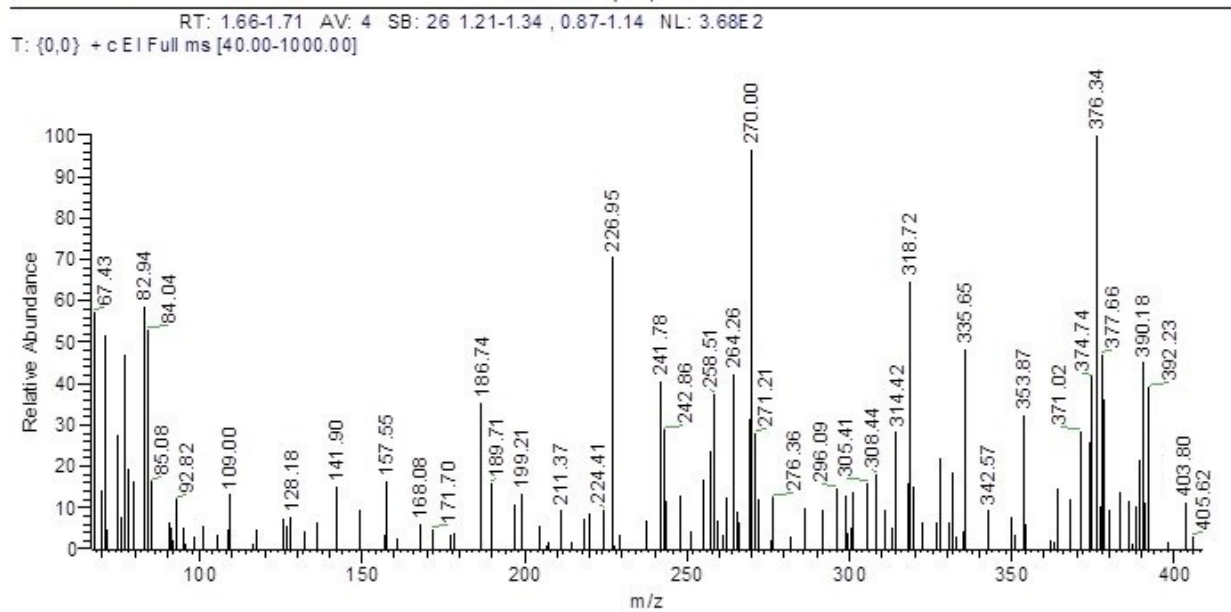

**Fig. S31:** MS of the compound **4d**.

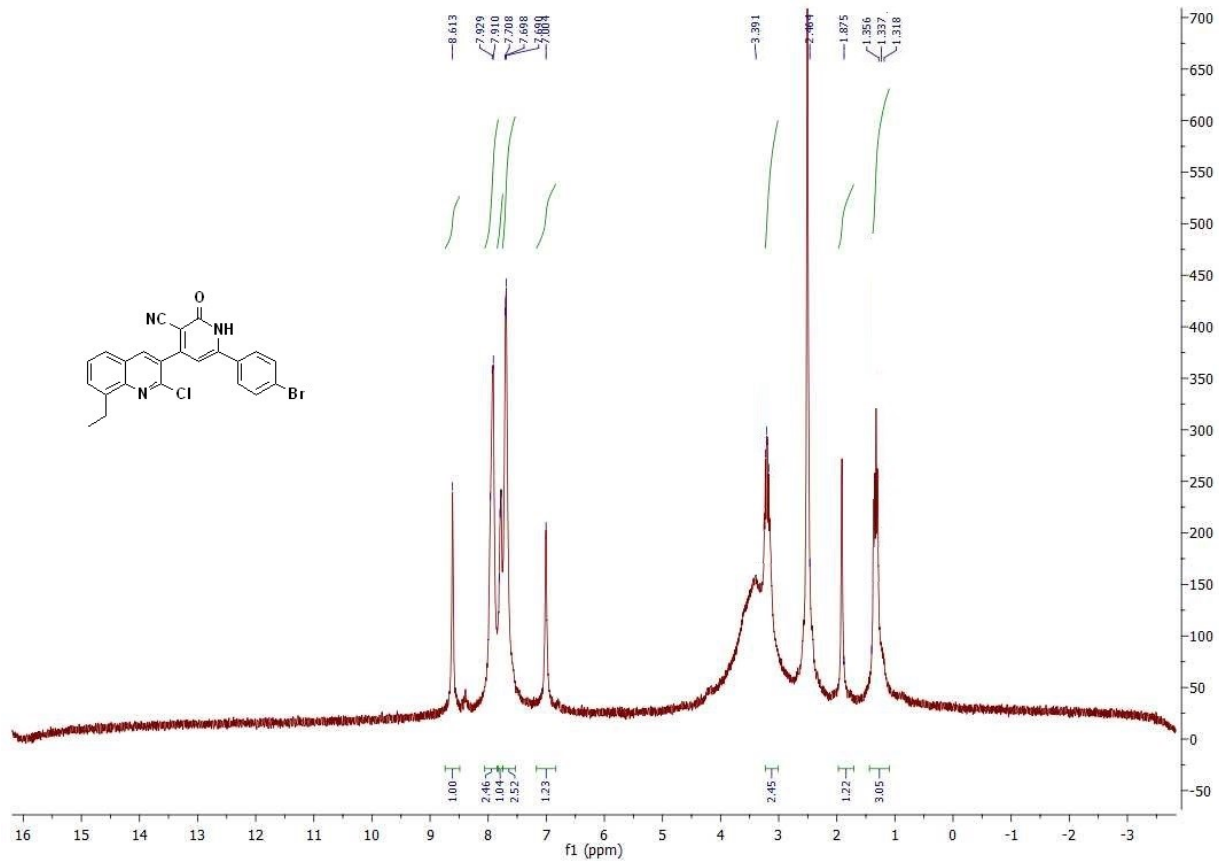

**Fig. S32:** <sup>1</sup>H NMR (400 MHz, DMSO-*d*<sub>6</sub>) spectrum of the compound 4e.

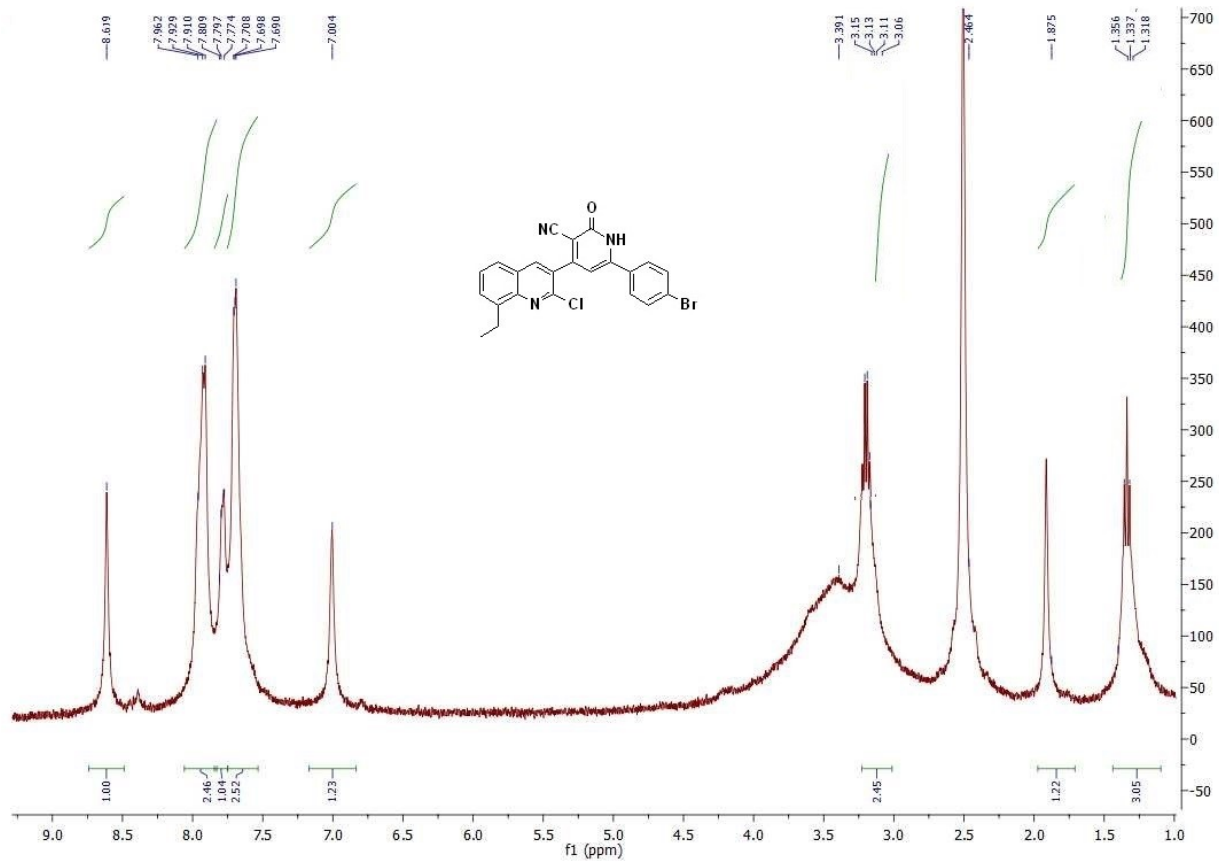

**Fig. S33:**  $^1\text{H}$  NMR (400 MHz,  $\text{DMSO-}d_6$ ) magnified spectrum of the compound **4e**.

RT: 1.61-1.81 AV: 13 SB: 26 1.21-1.34, 0.87-1.14 NL: 8.44E1  
T: {0,0} + c EI Full ms [40.00-1000.00]

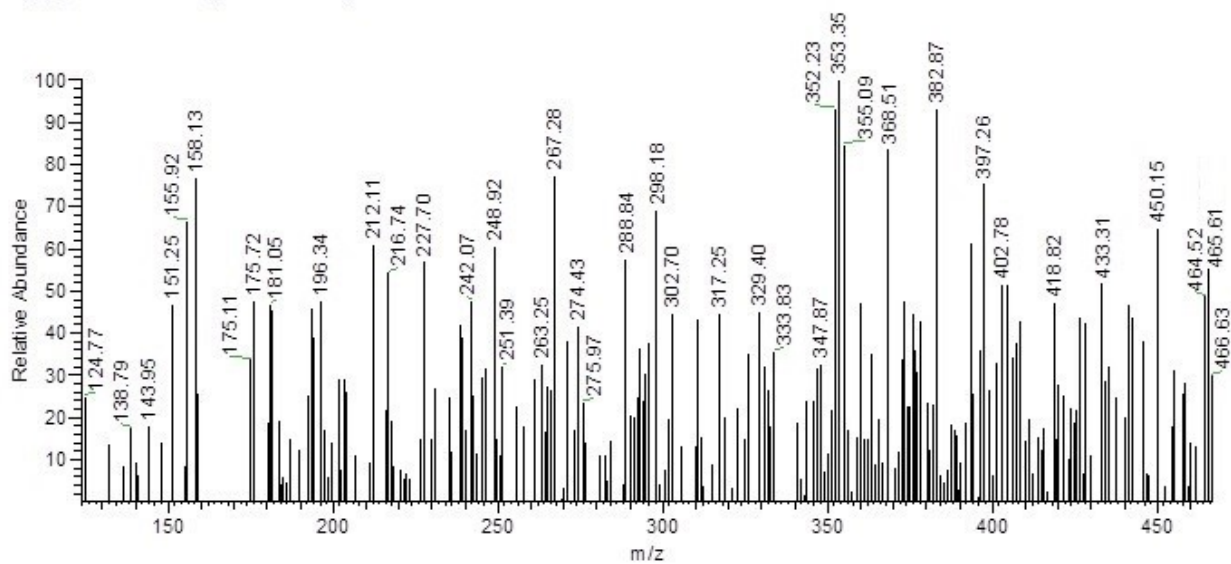

Fig. S34: MS of the compound 4e.

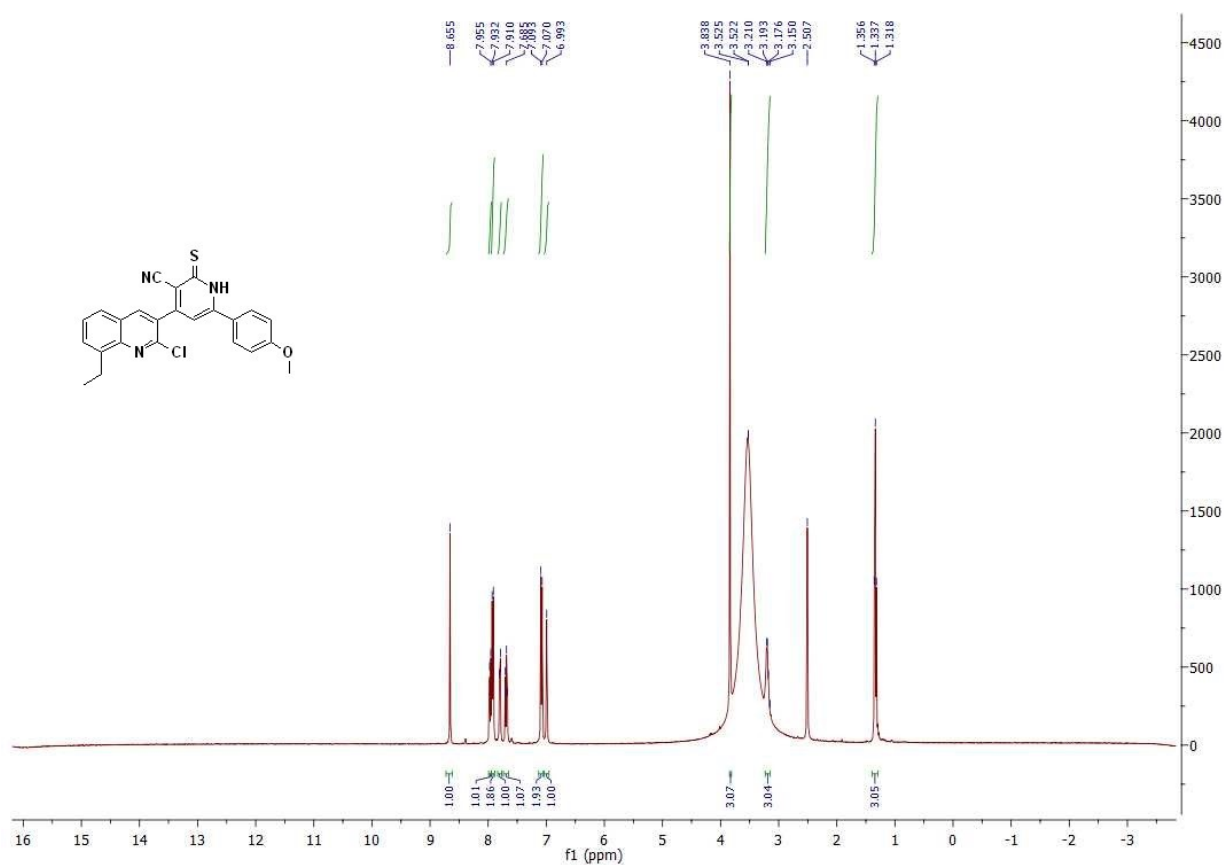

Fig. S35: <sup>1</sup>H NMR (400 MHz, DMSO-*d*<sub>6</sub>) spectrum of the compound 5a.



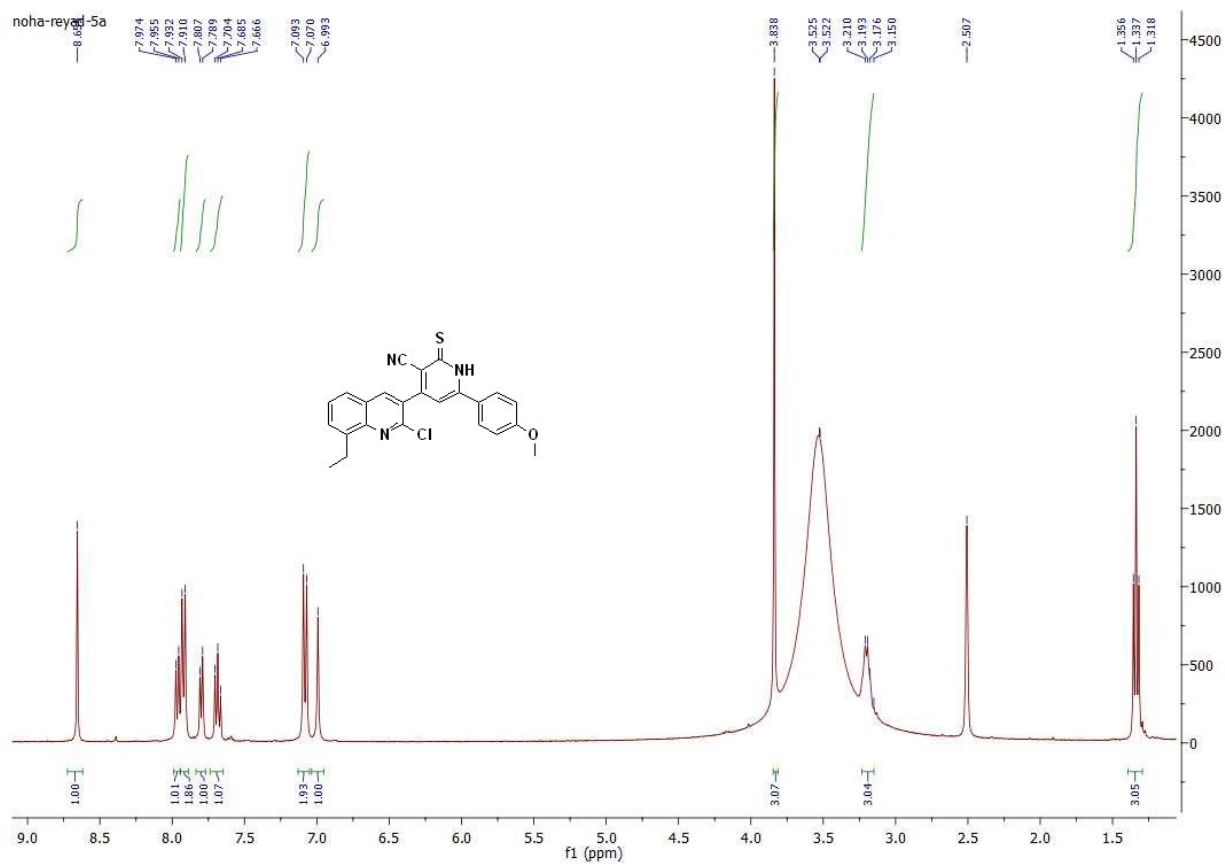

**Fig. S36:**  $^1\text{H}$  NMR (400 MHz,  $\text{DMSO-}d_6$ ) magnified spectrum of the compound **5a**.

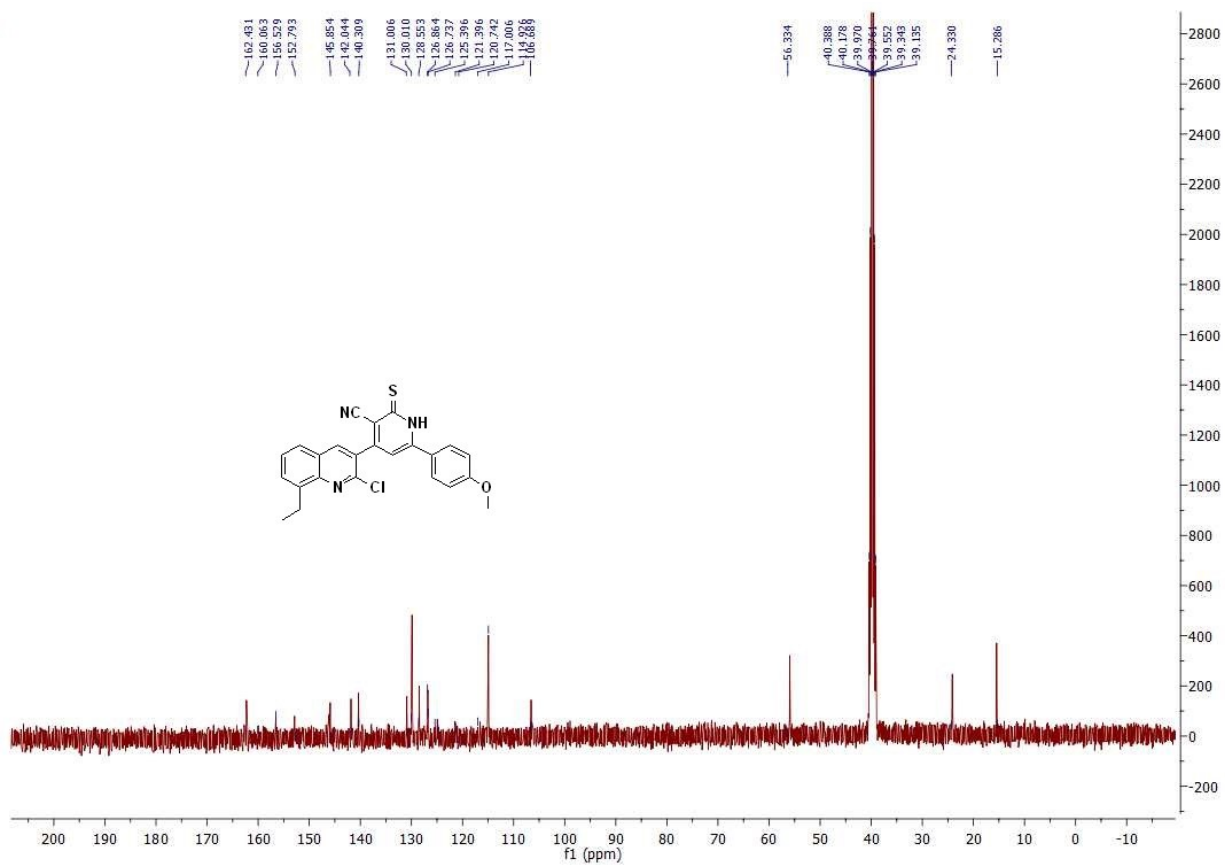

**Fig. S37:** <sup>13</sup>C NMR (100 MHz, DMSO-*d*<sub>6</sub>) spectrum of the compound **5a**.

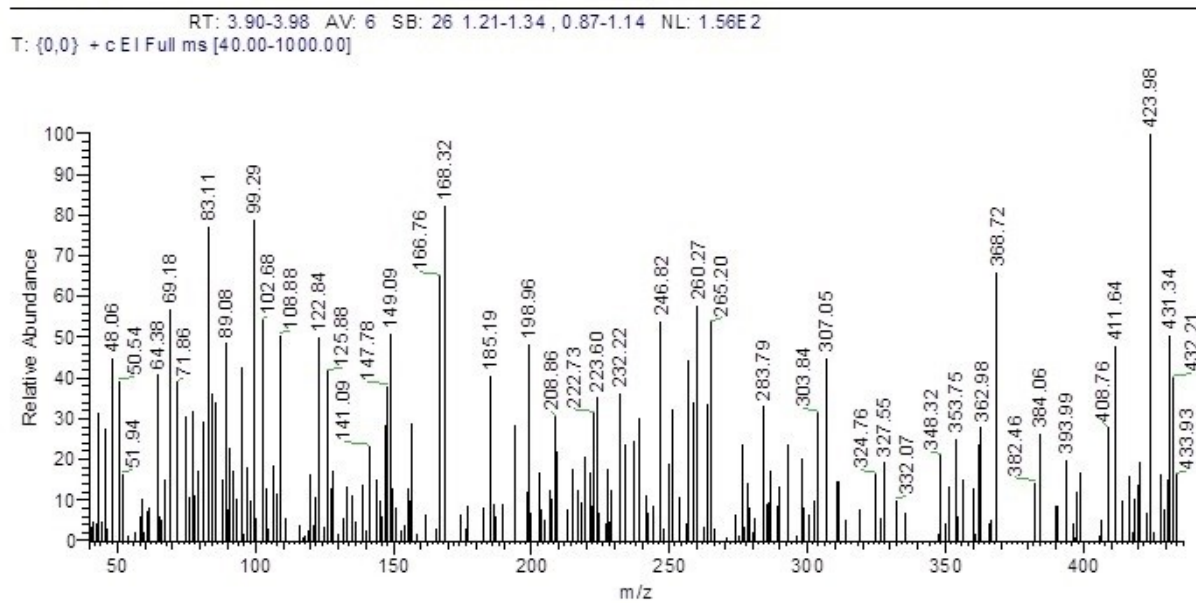

**Fig. S38:** MS of the compound **5a**.

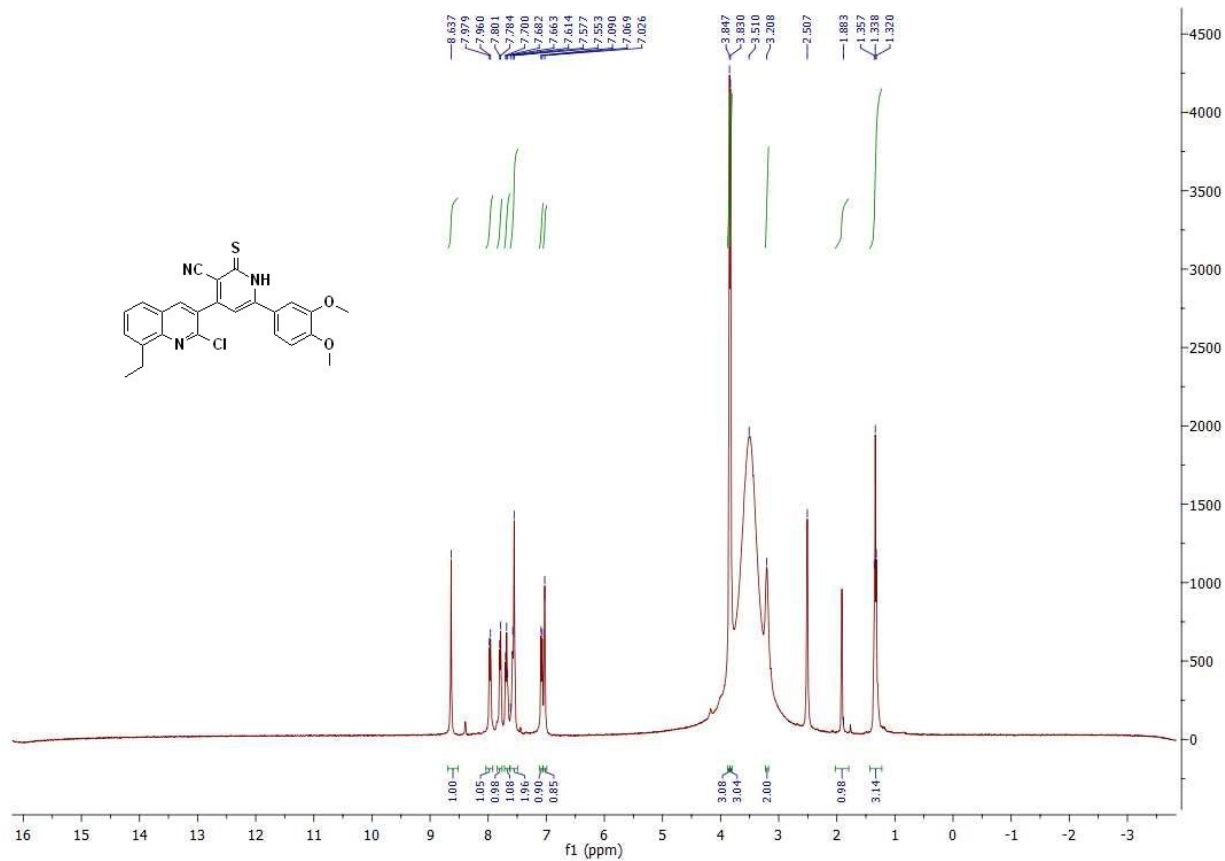

**Fig. S39:**  $^1\text{H NMR}$  (400 MHz,  $\text{DMSO-}d_6$ ) spectrum of the compound **5b**.

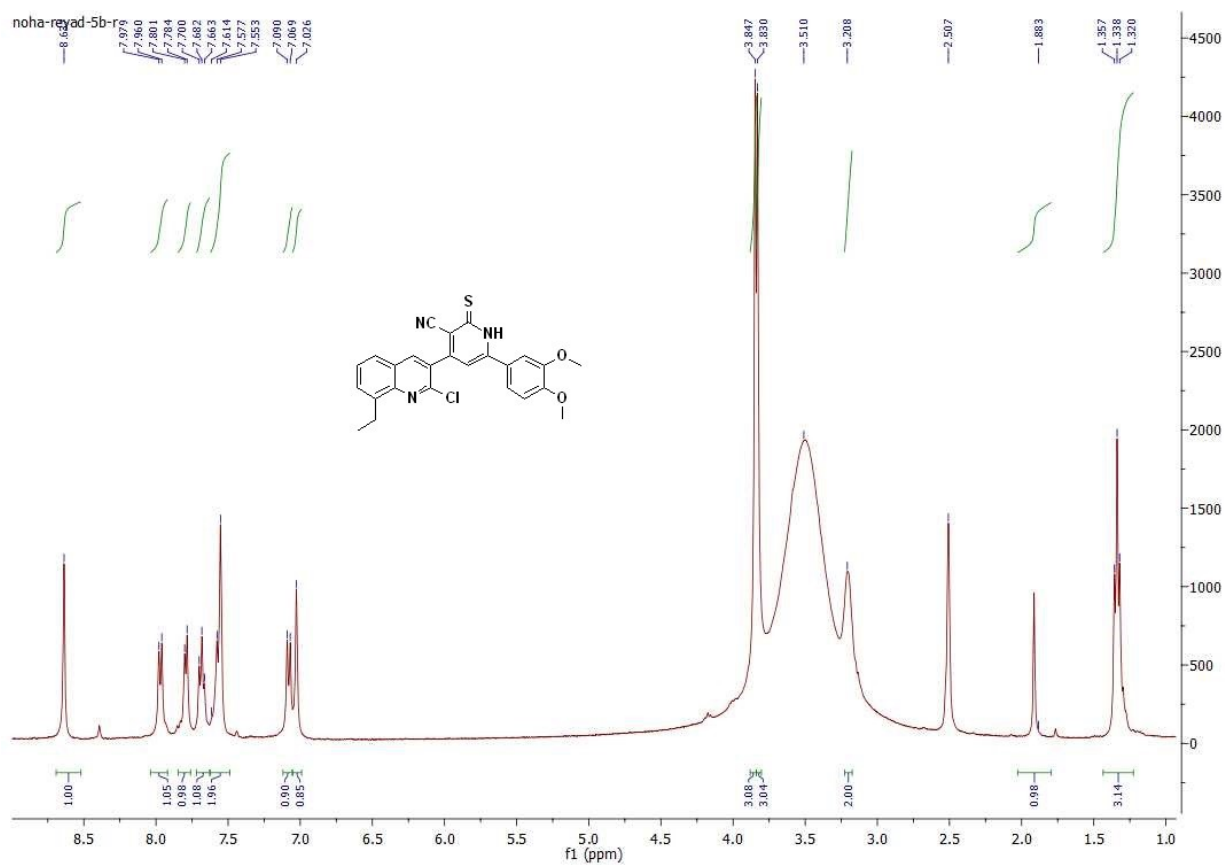

**Fig. S40:**  $^1\text{H NMR}$  (400 MHz,  $\text{DMSO-}d_6$ ) magnified spectrum of the compound **5b**.

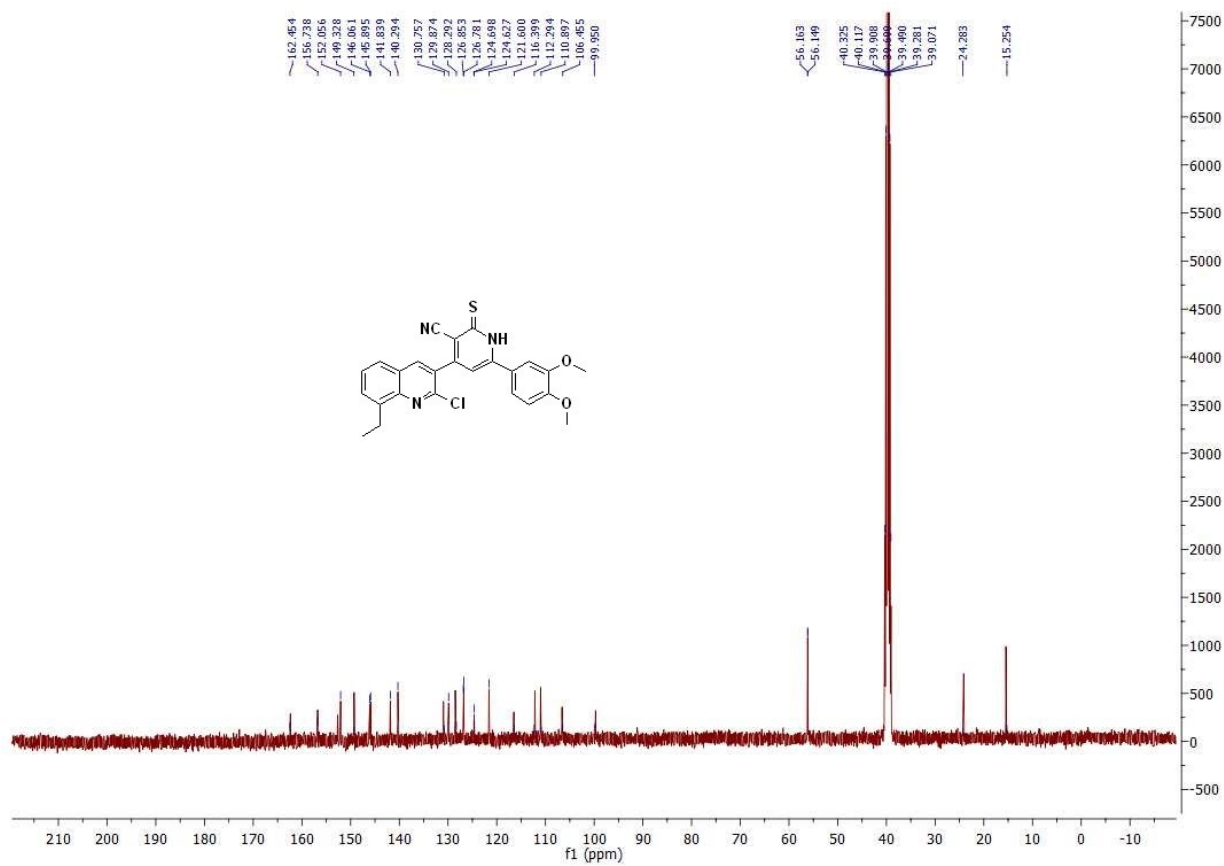

Fig. S41:  $^{13}\text{C}$  NMR (100 MHz,  $\text{DMSO-}d_6$ ) spectrum of the compound **5b**.

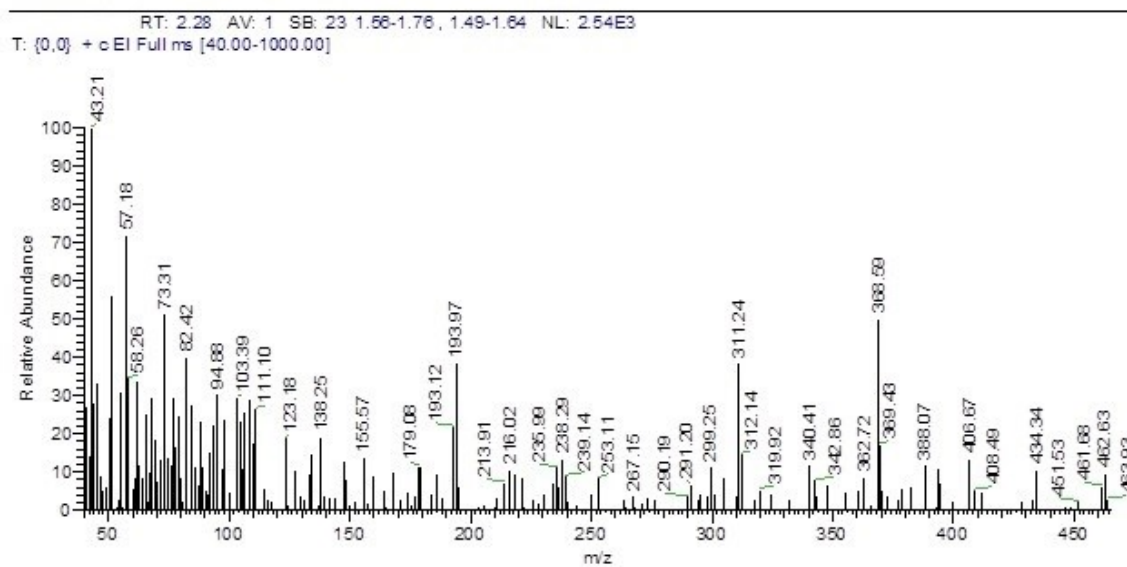

Fig. S42: MS of the compound **5b**.

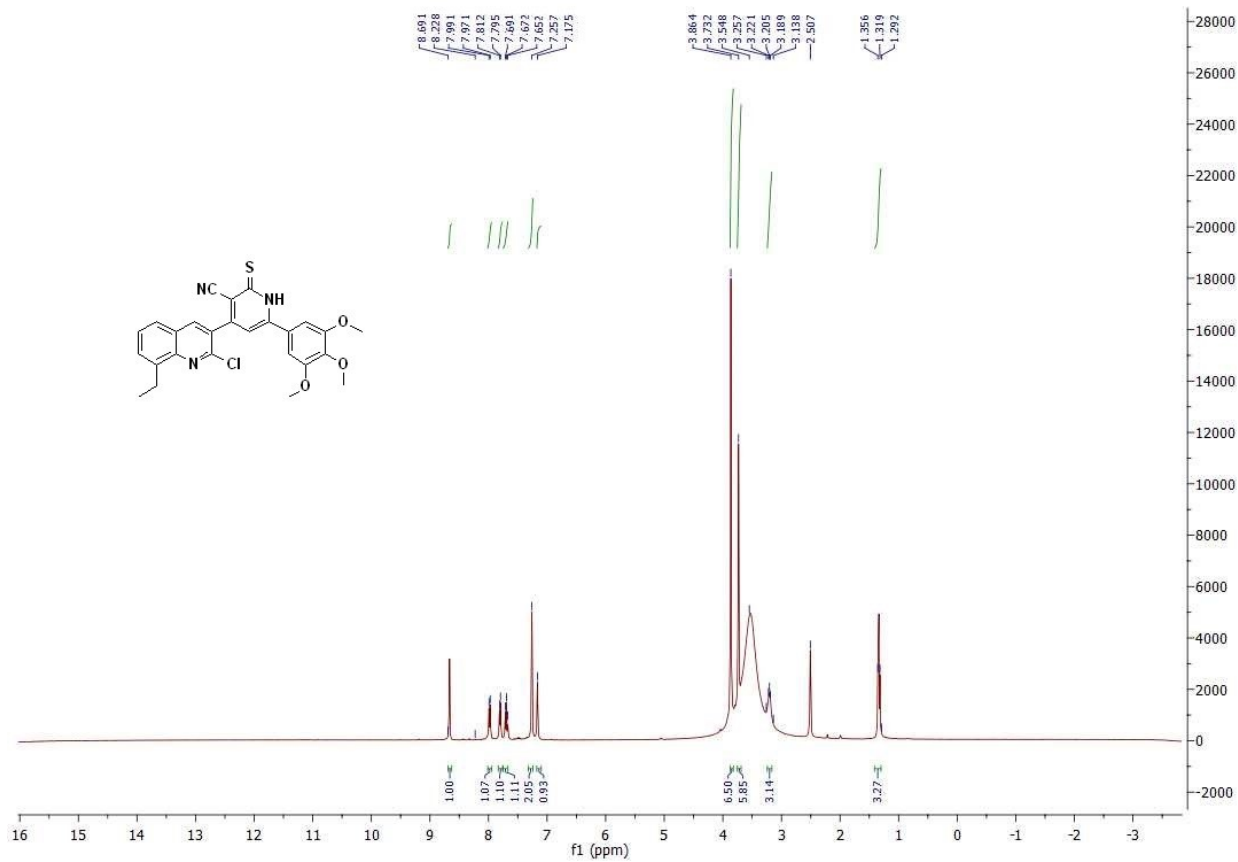

**Fig. S43:** <sup>1</sup>H NMR (400 MHz, DMSO-*d*<sub>6</sub>) spectrum of the compound **5c**.

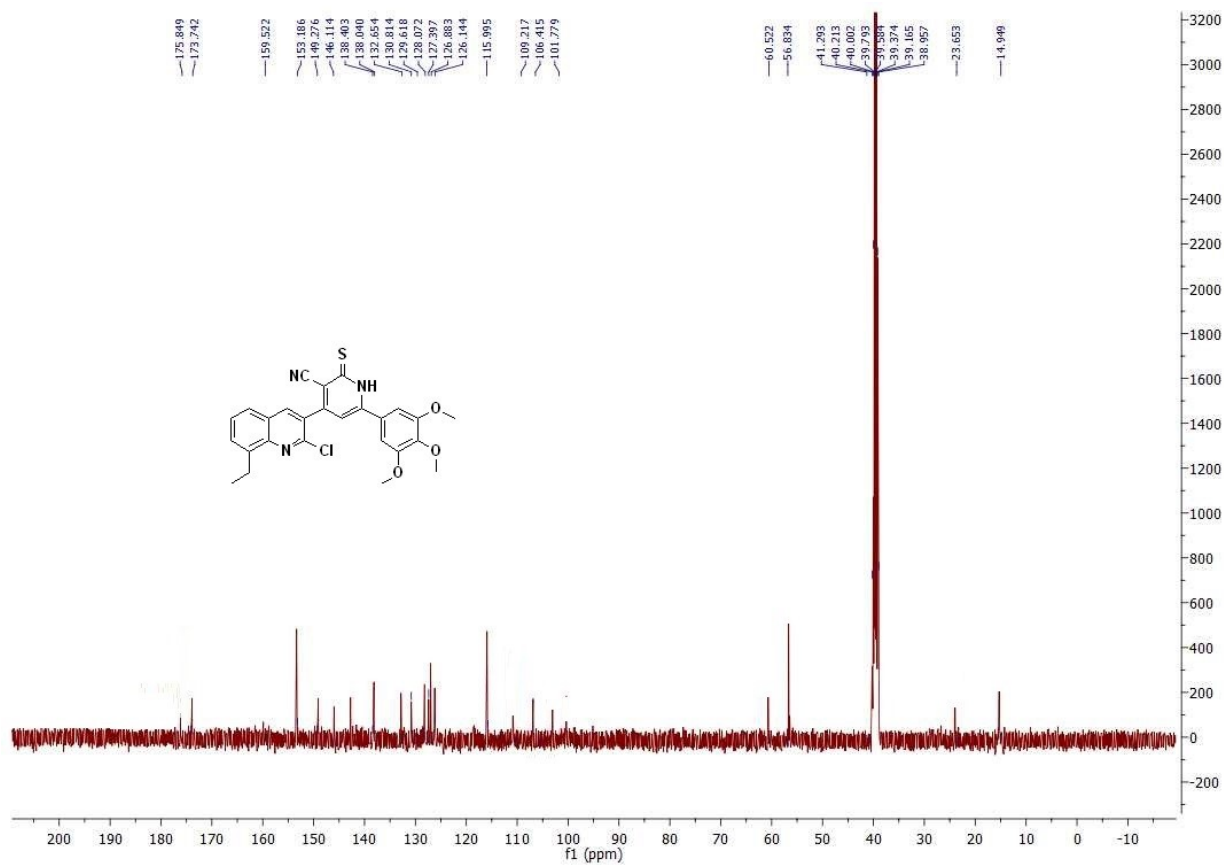

Fig. S44: <sup>13</sup>C NMR (100 MHz, DMSO-*d*<sub>6</sub>) spectrum of the compound 5c.

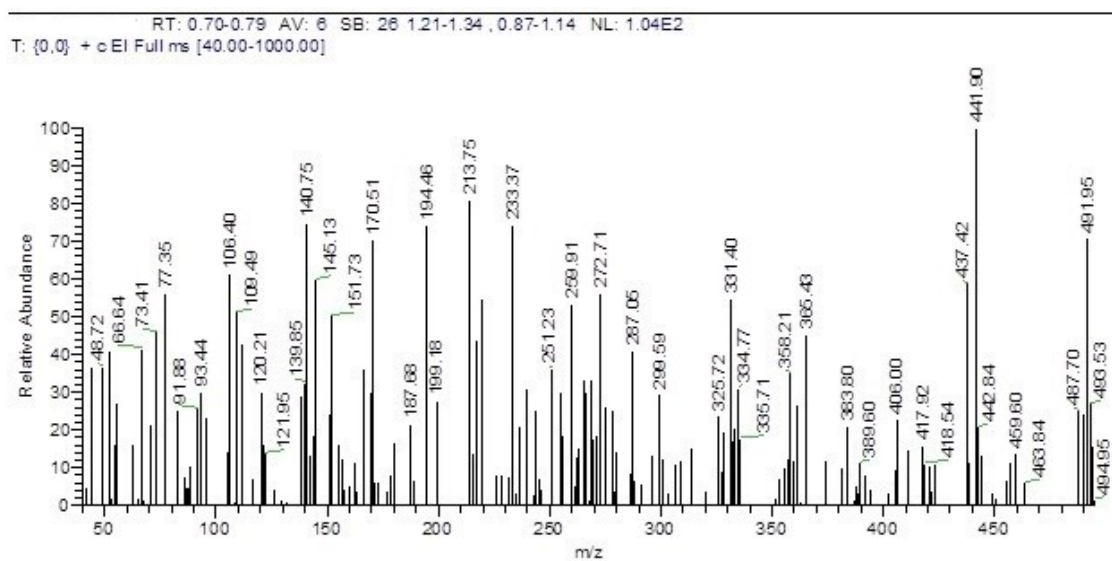

Fig. S45: MS of the compound 5c.

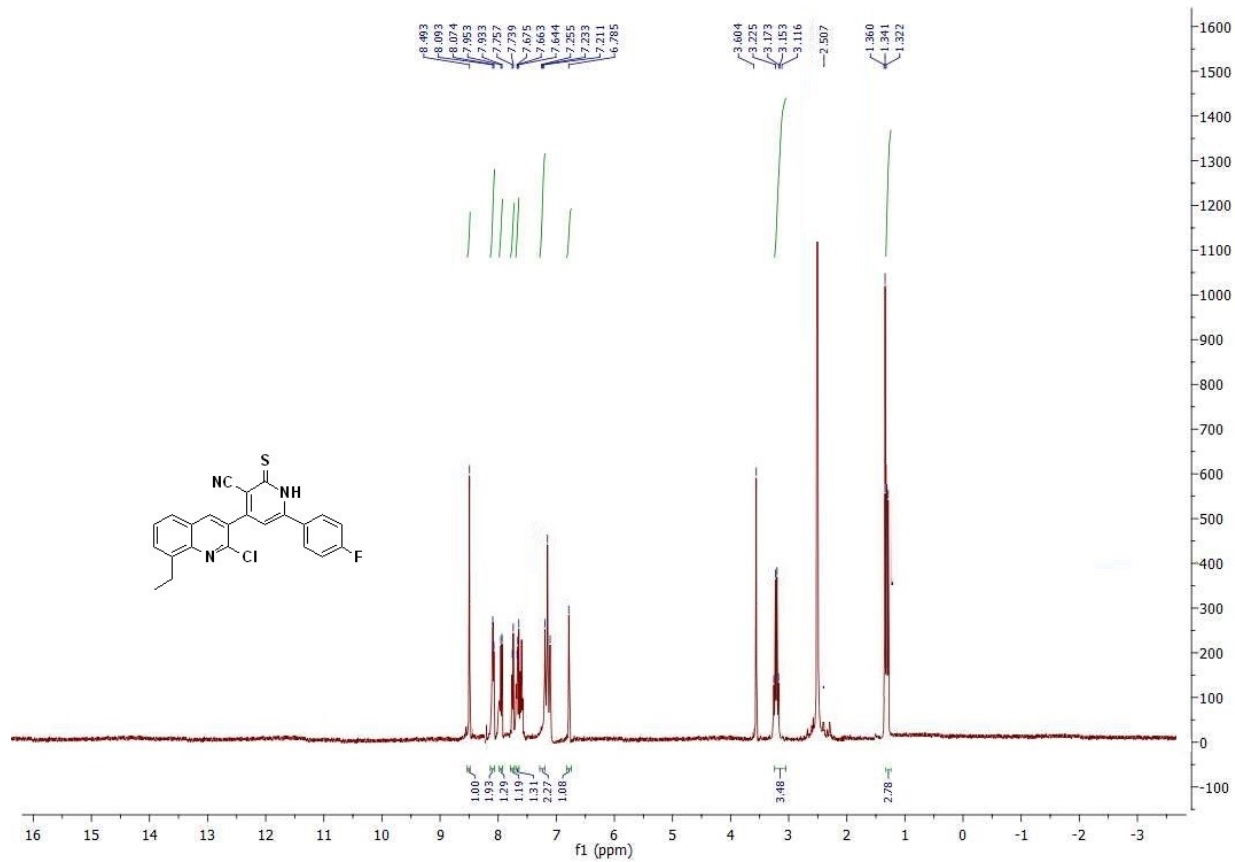

**Fig. S46:**  $^1\text{H}$  NMR (400 MHz,  $\text{DMSO-}d_6$ ) spectrum of the compound **5d**.



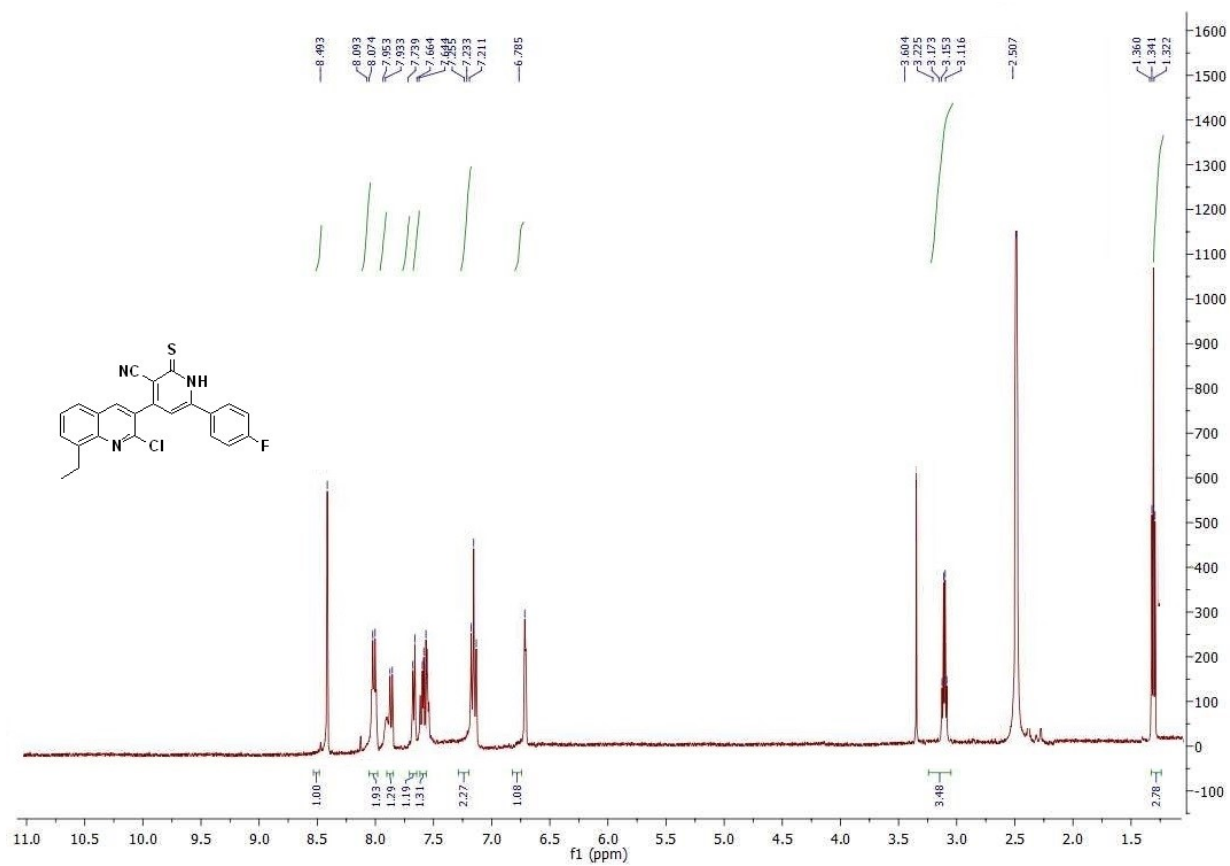

**Fig. S47:**  $^1\text{H}$  NMR (400 MHz,  $\text{DMSO-}d_6$ ) magnified spectrum of the compound **5d**.

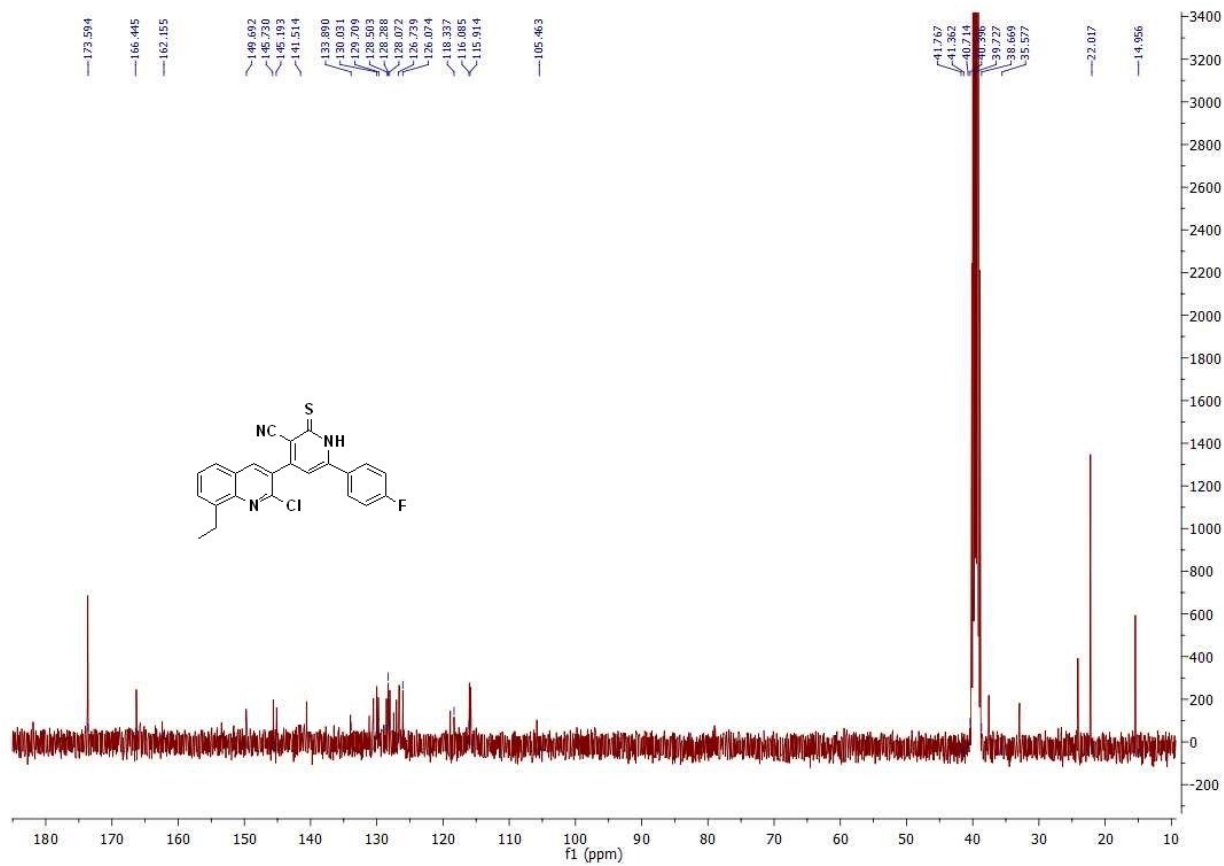

**Fig. S48:** <sup>13</sup>C NMR (100 MHz, DMSO-*d*<sub>6</sub>) spectrum of the compound 5d.

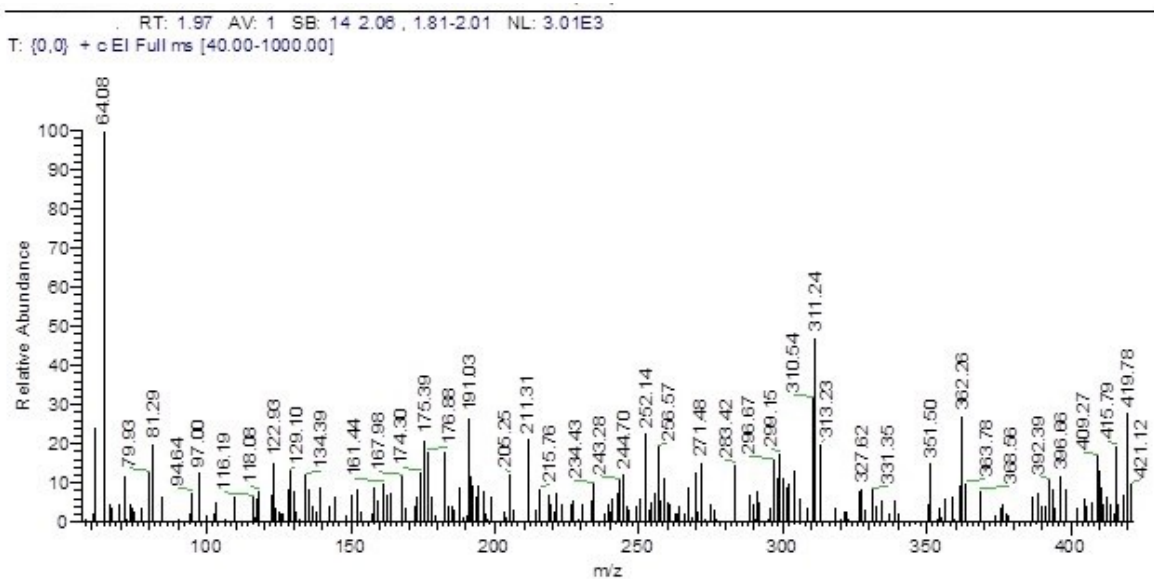

**Fig. S49:** MS of the compound 5d.

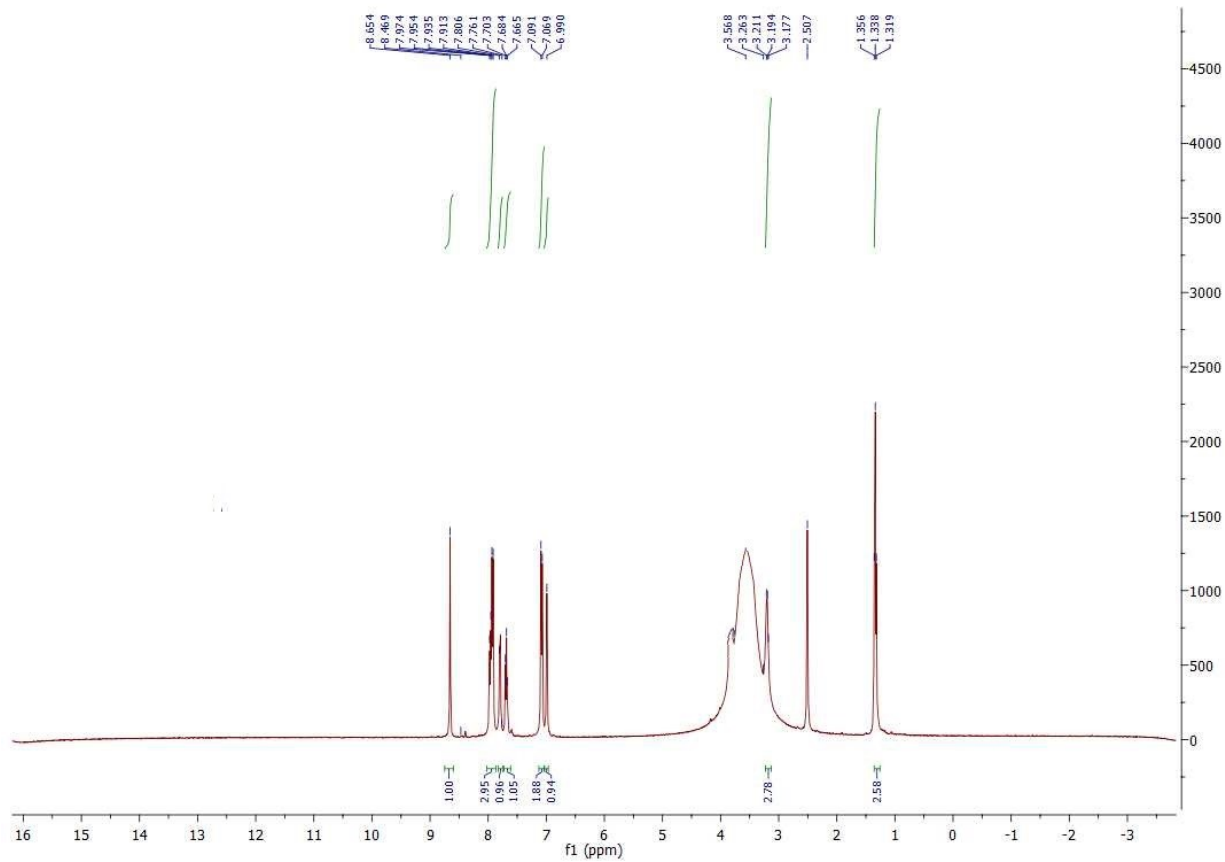

**Fig. S50:**  $^1\text{H}$  NMR (400 MHz,  $\text{DMSO-}d_6$ ) spectrum of the compound **5e**.

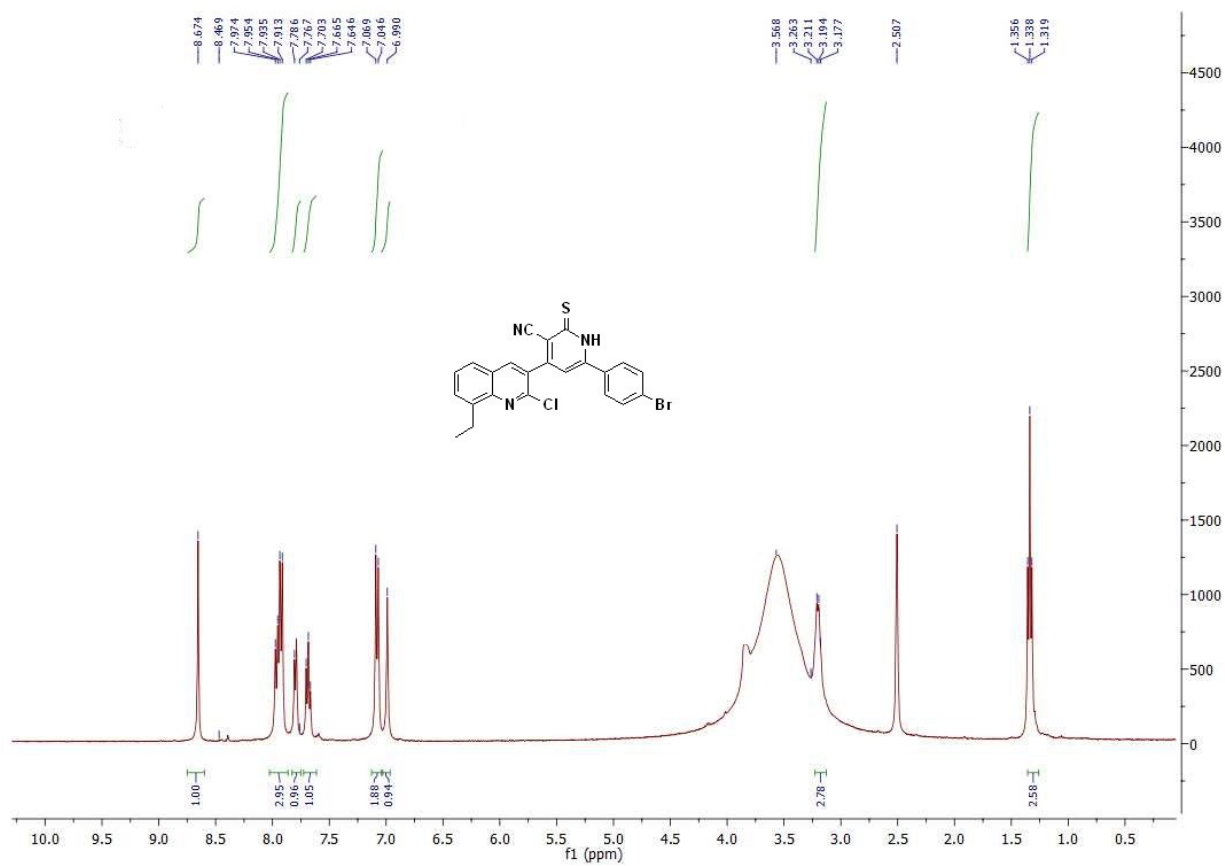

**Fig. S51:** <sup>1</sup>H NMR (400 MHz, DMSO-*d*<sub>6</sub>) magnified spectrum of the compound 5e.

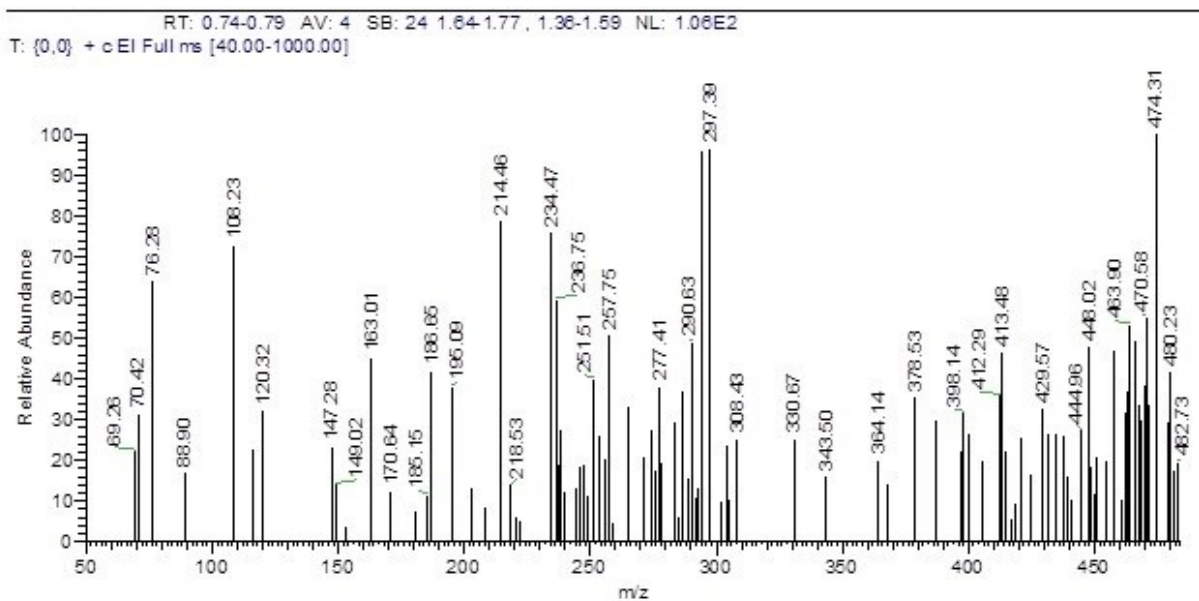

**Fig. S52:** MS of the compound 5e.

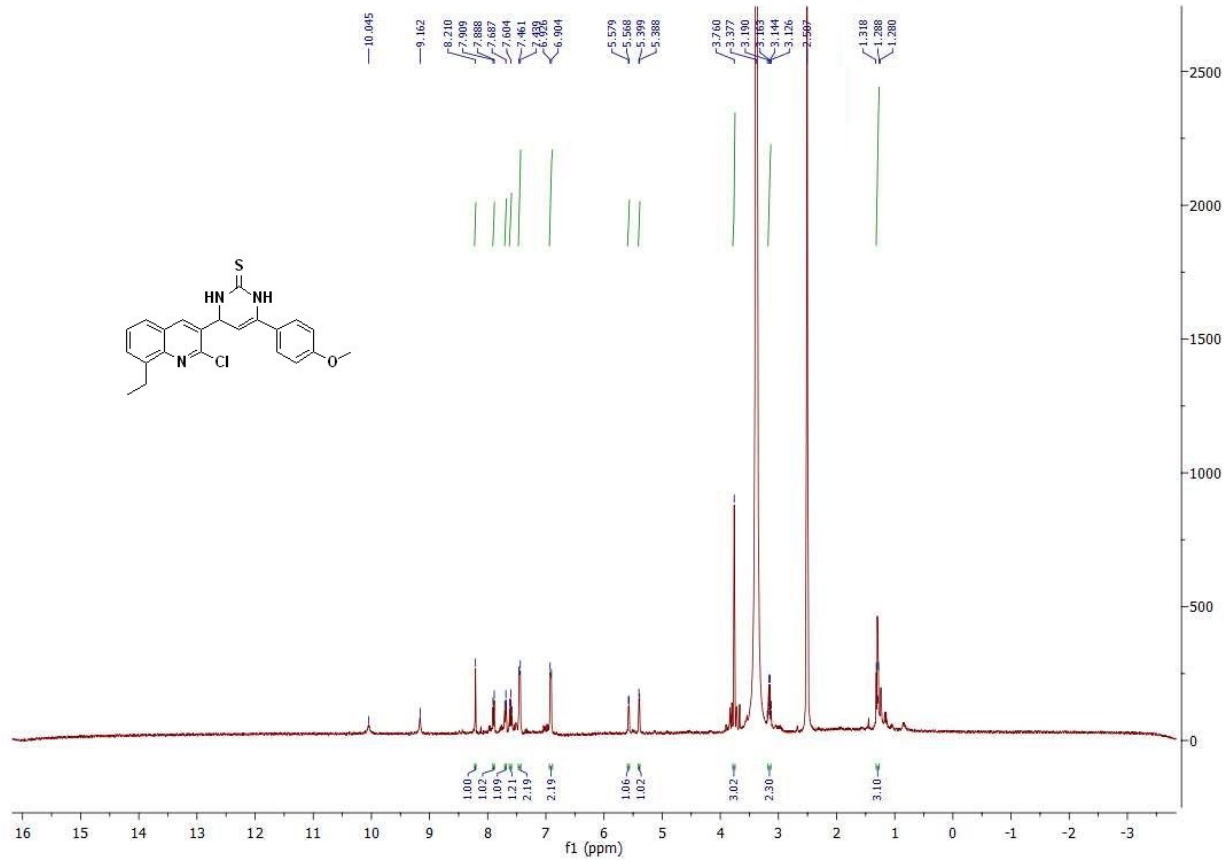

**Fig. S53:** <sup>1</sup>H NMR (400 MHz, DMSO-*d*<sub>6</sub>) spectrum of the compound **6a**.

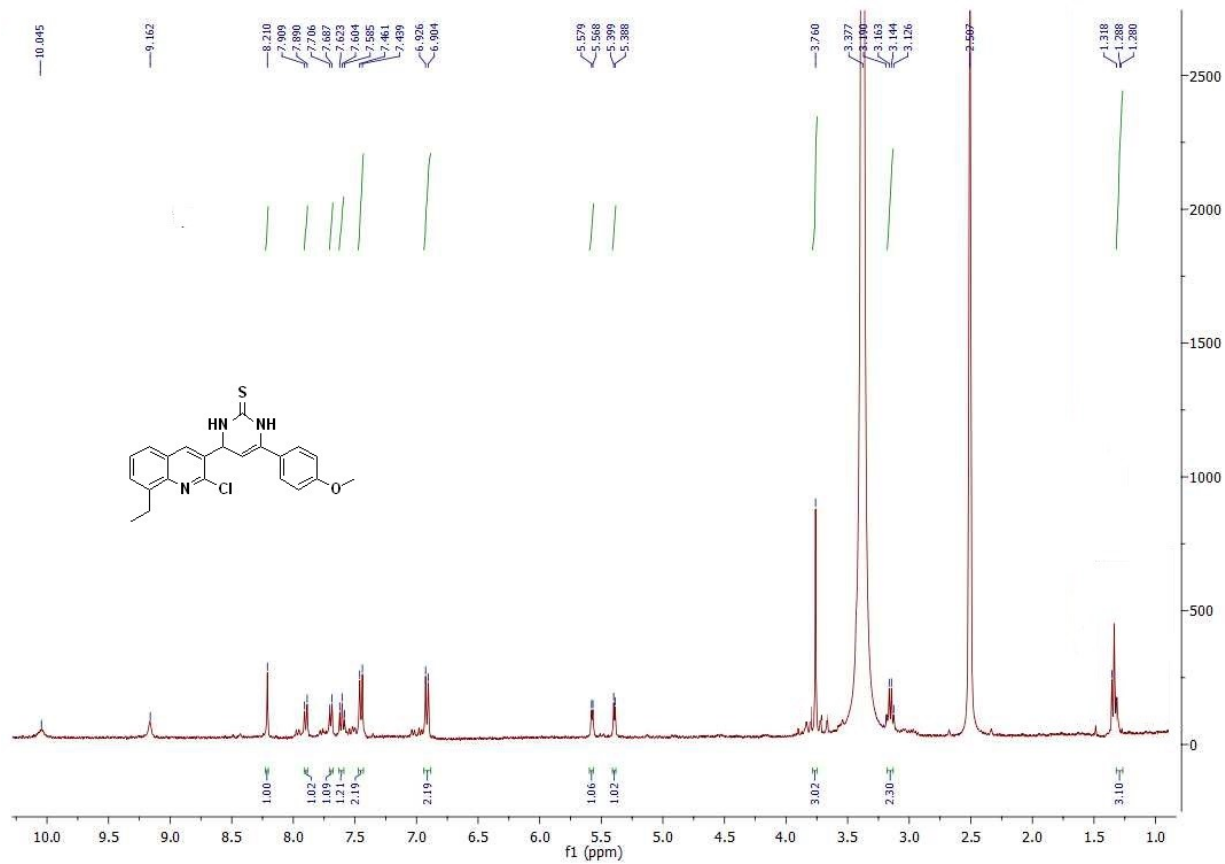

**Fig. S54:** <sup>1</sup>H NMR (400 MHz, DMSO-*d*<sub>6</sub>) magnified spectrum of the compound **6a**.

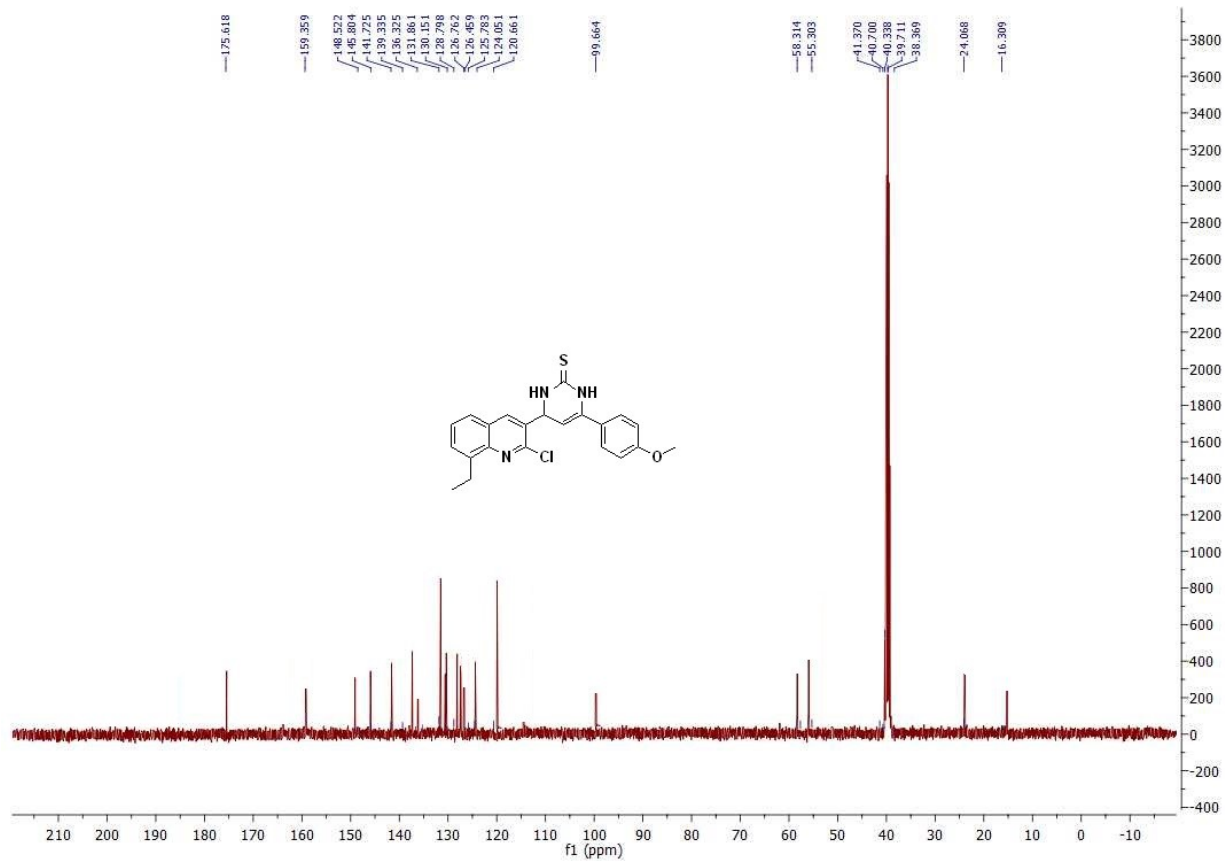

Fig. S55:  $^{13}\text{C}$  NMR (100 MHz,  $\text{DMSO-}d_6$ ) spectrum of the compound 6a.

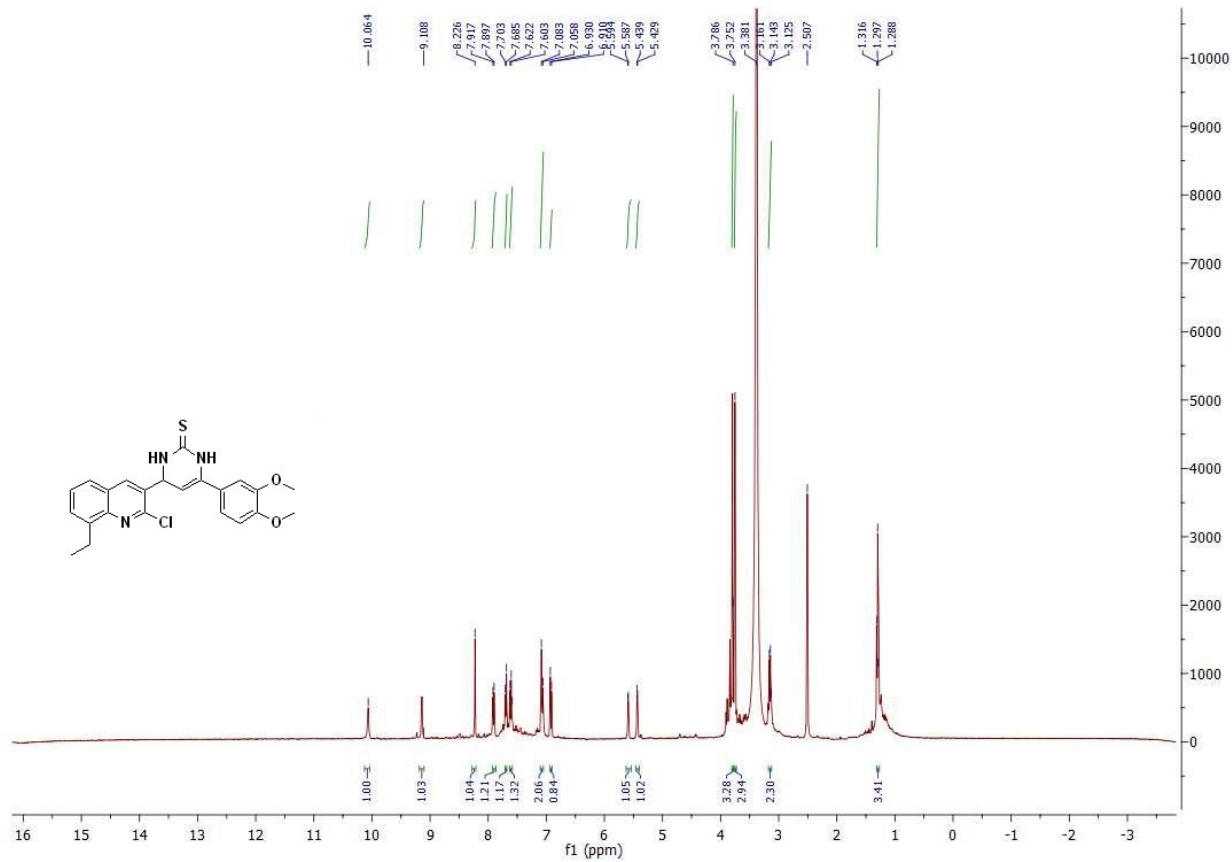

**Fig. S56:**  $^1\text{H}$  NMR (400 MHz,  $\text{DMSO-}d_6$ ) spectrum of the compound **6b**.



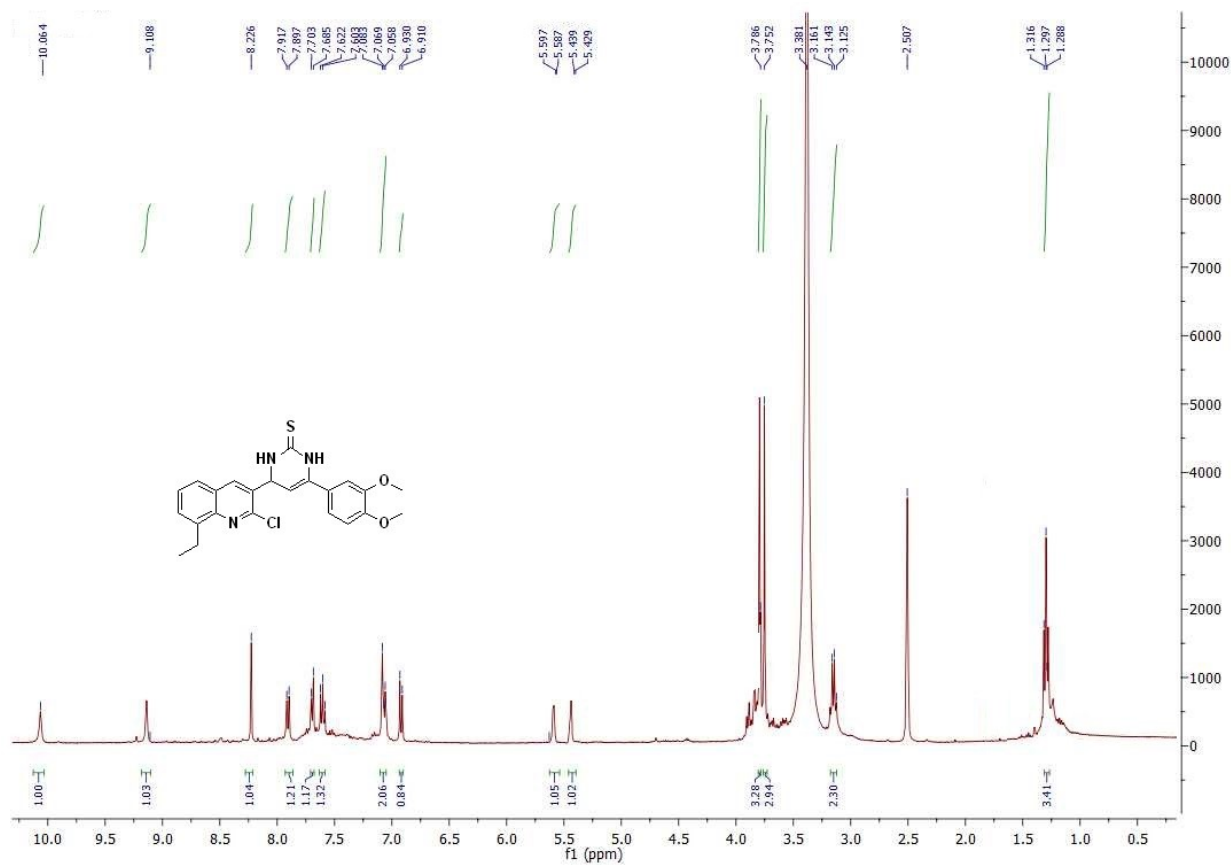

**Fig. S57:**  $^1\text{H}$  NMR (400 MHz,  $\text{DMSO-}d_6$ ) magnified spectrum of the compound **6b**.

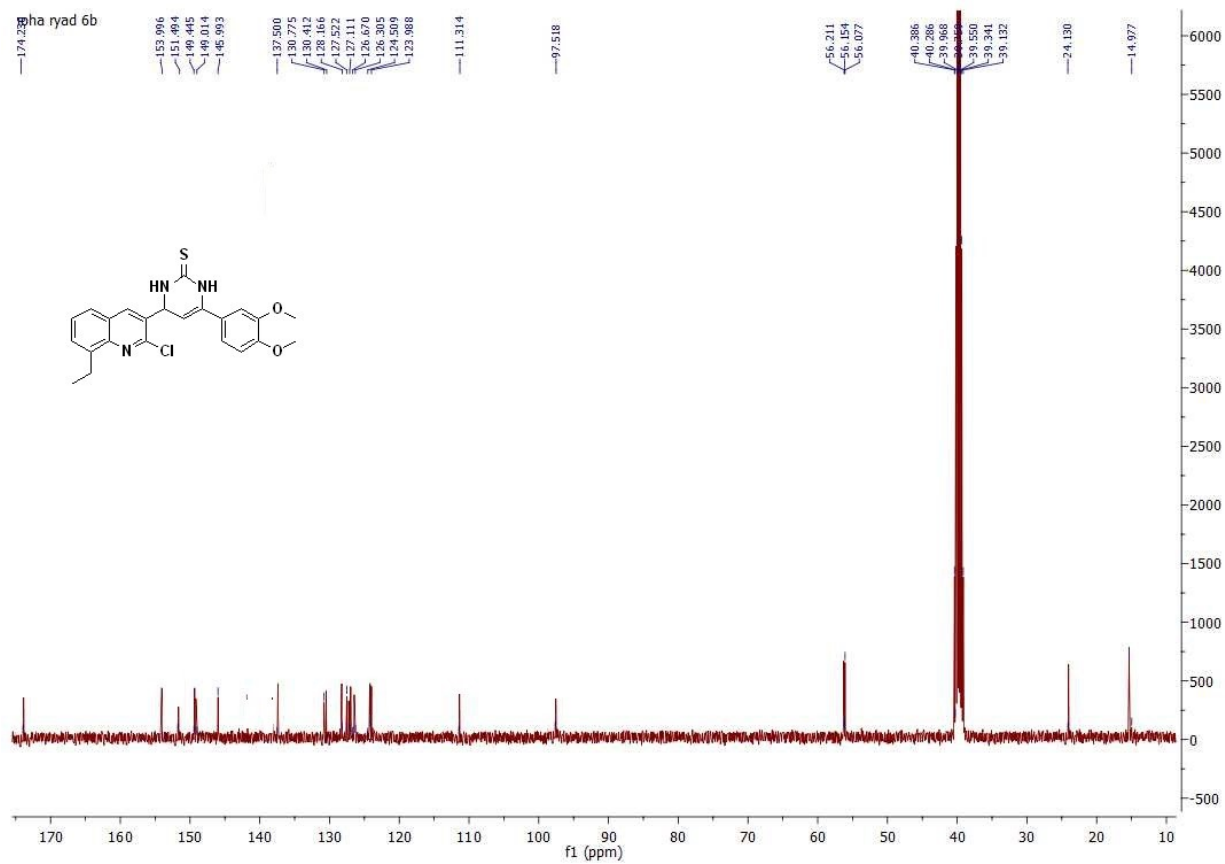

**Fig. S58:** <sup>13</sup>C NMR (100 MHz, DMSO-*d*<sub>6</sub>) spectrum of the compound **6b**.

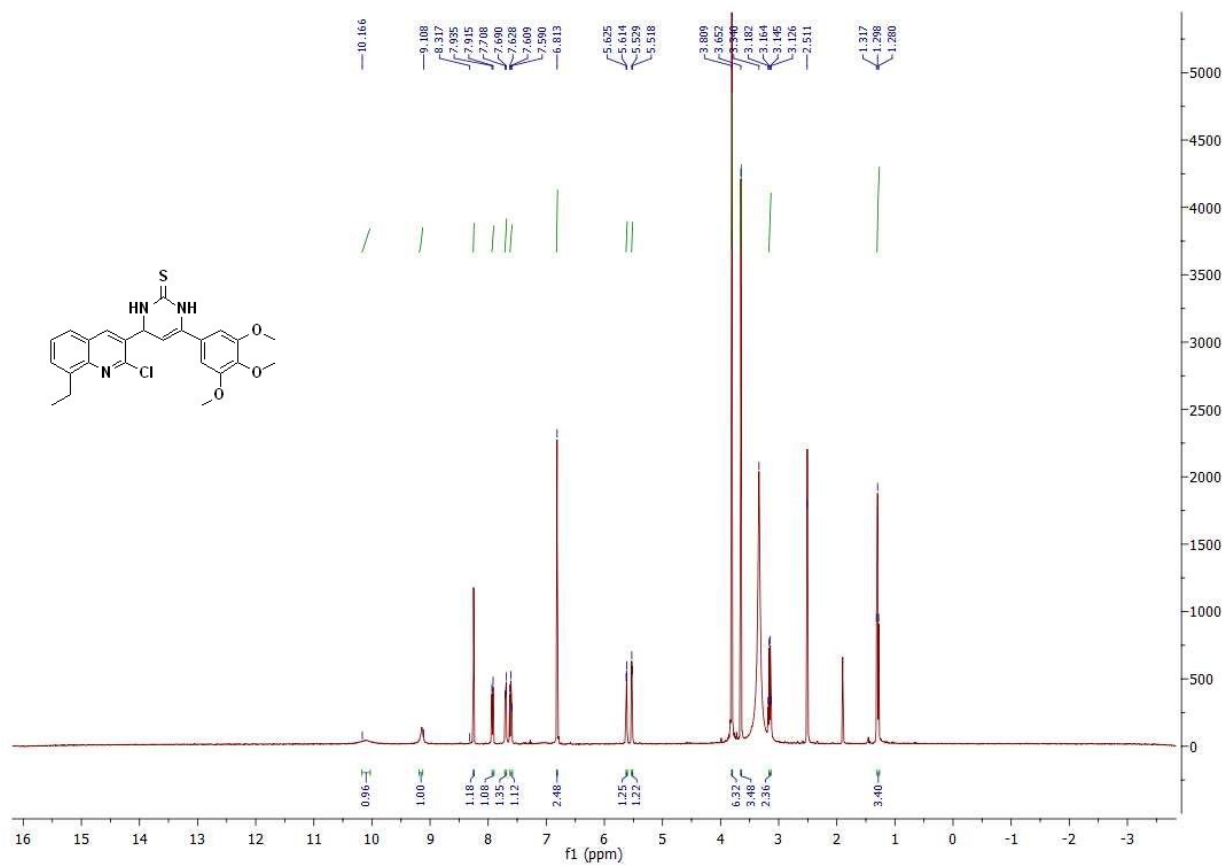

**Fig. S59:**  $^1\text{H NMR}$  (400 MHz,  $\text{DMSO-}d_6$ ) spectrum of the compound **6c**.

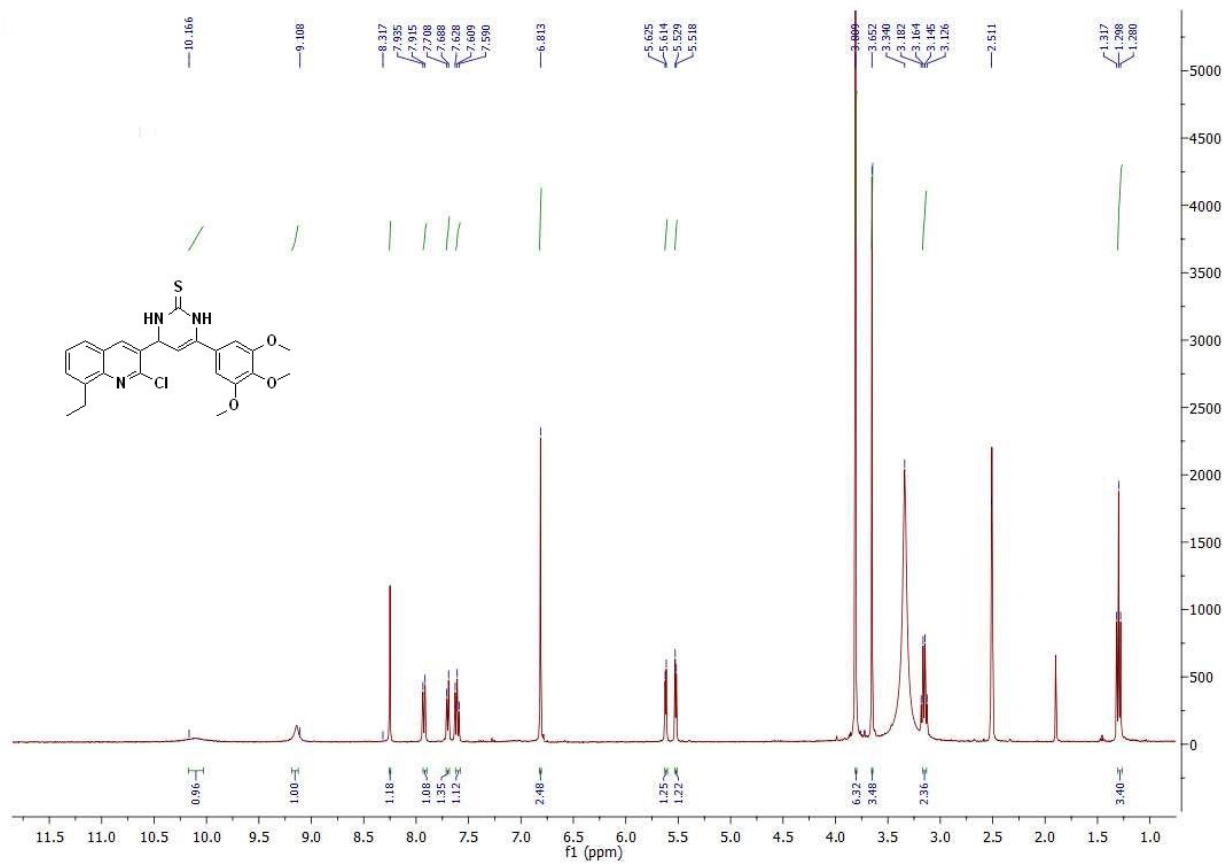

**Fig. S60:**  $^1\text{H NMR}$  (400 MHz,  $\text{DMSO-}d_6$ ) spectrum of the compound **6c**.

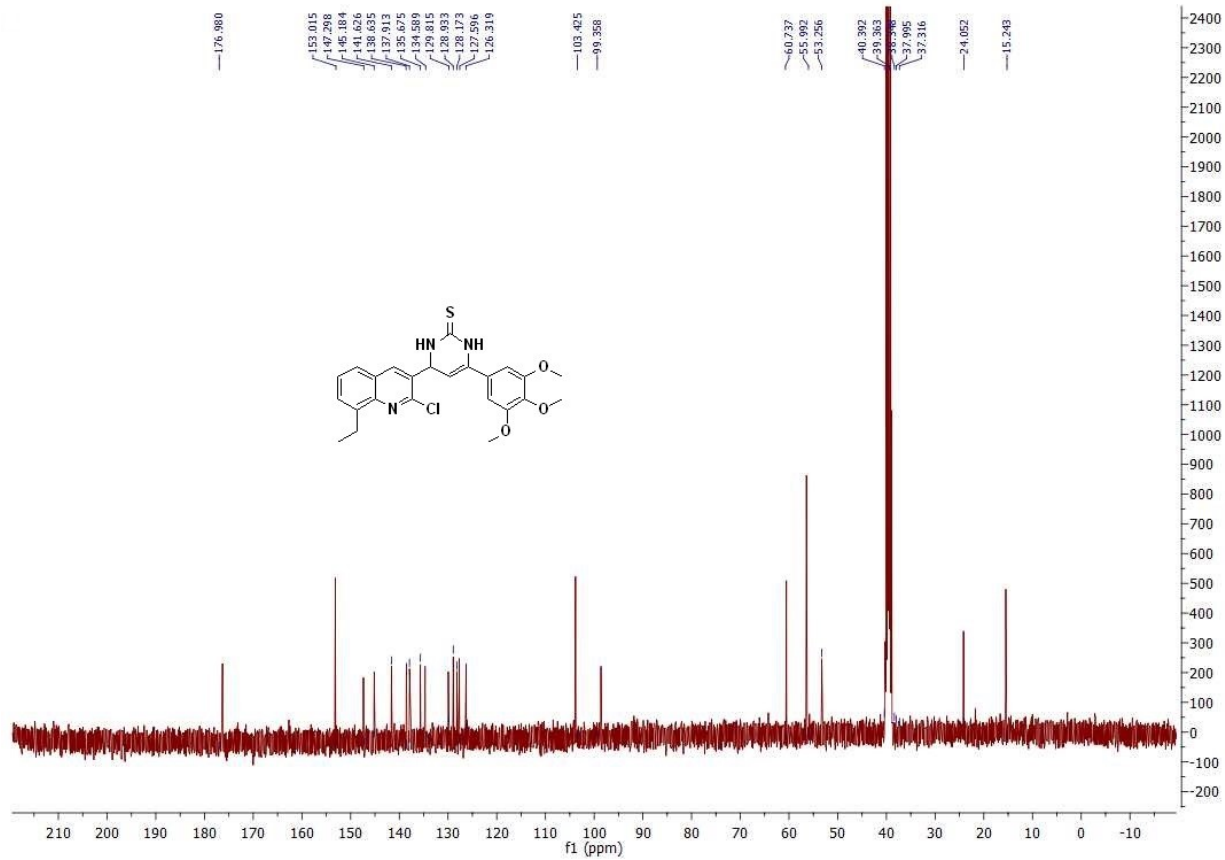

**Fig. S61:** <sup>13</sup>C NMR (100 MHz, DMSO-*d*<sub>6</sub>) spectrum of the compound **6c**.

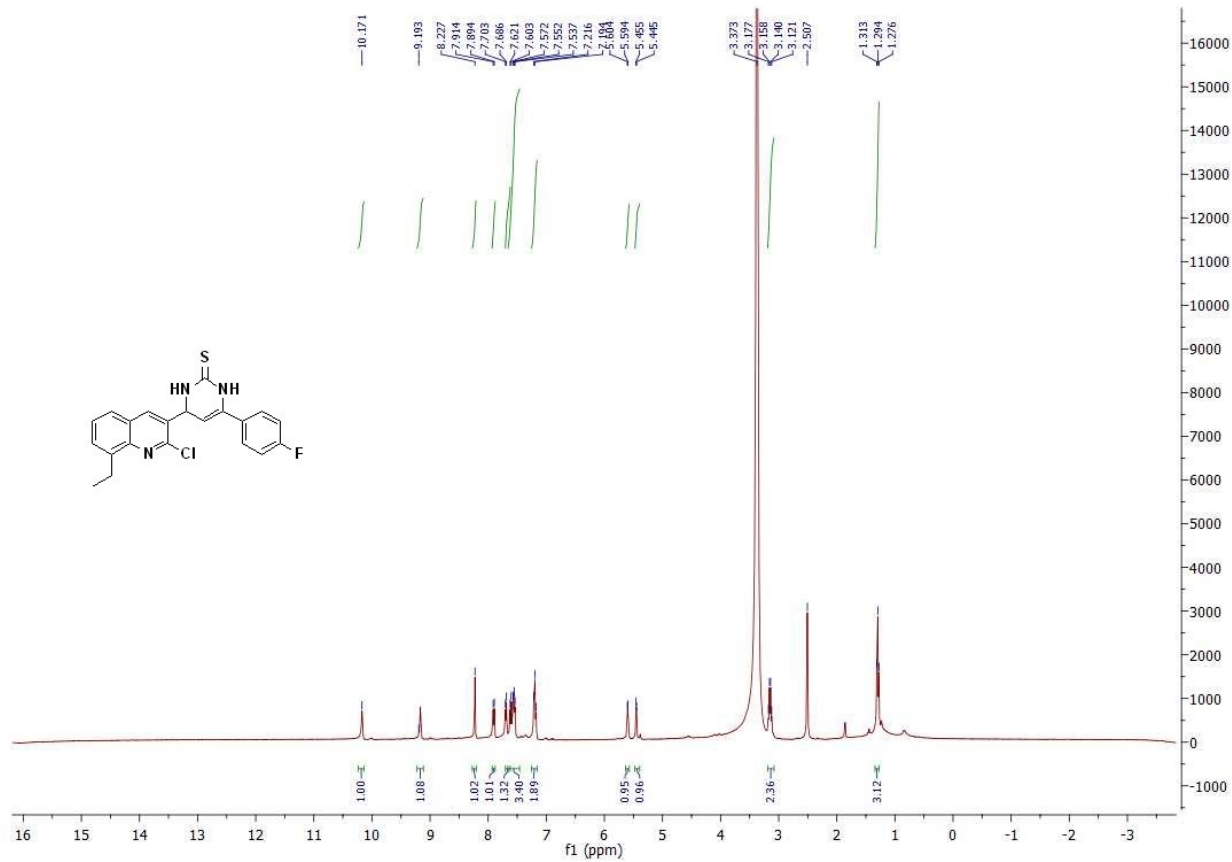

**Fig. S62:**  $^1\text{H}$  NMR (400 MHz,  $\text{DMSO}-d_6$ ) spectrum of the compound **6d**.

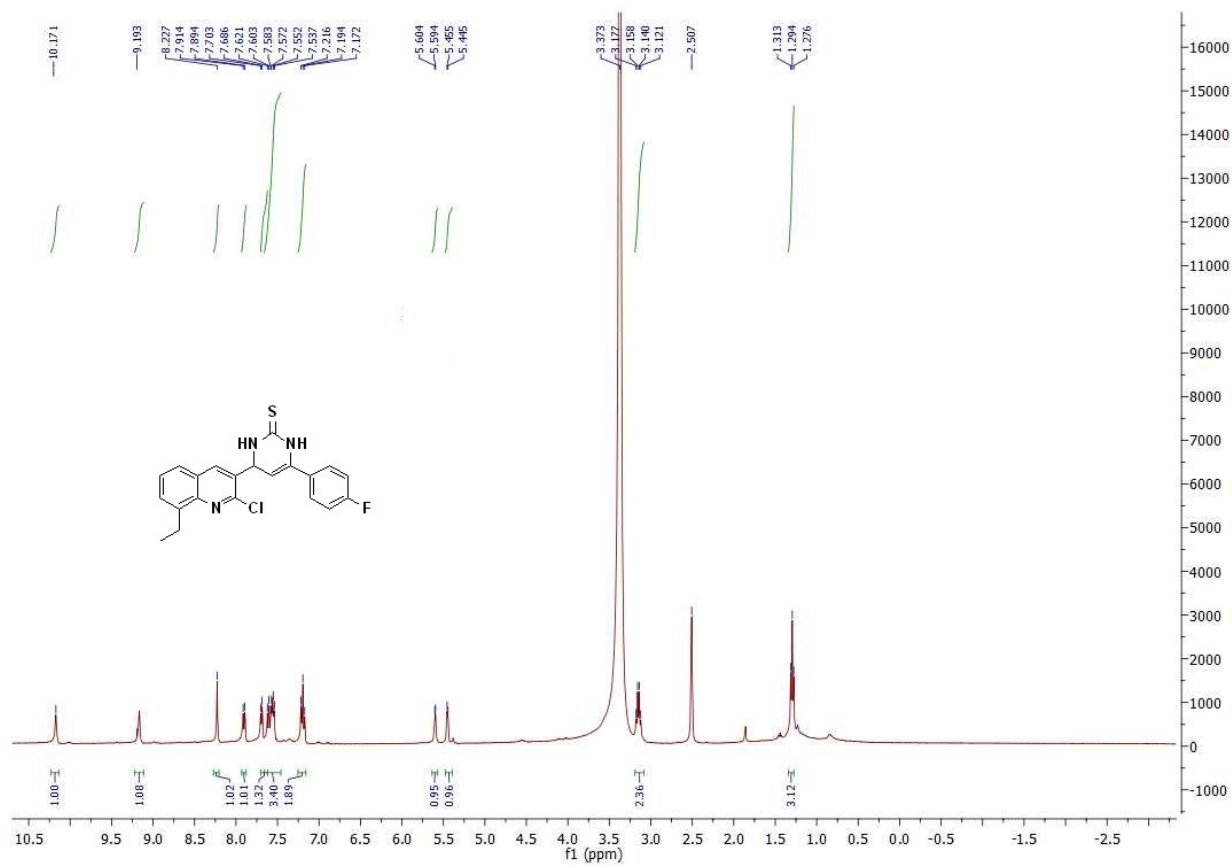

**Fig. S63:**  $^1\text{H}$  NMR (400 MHz,  $\text{DMSO-}d_6$ ) magnified spectrum of the compound **6d**.

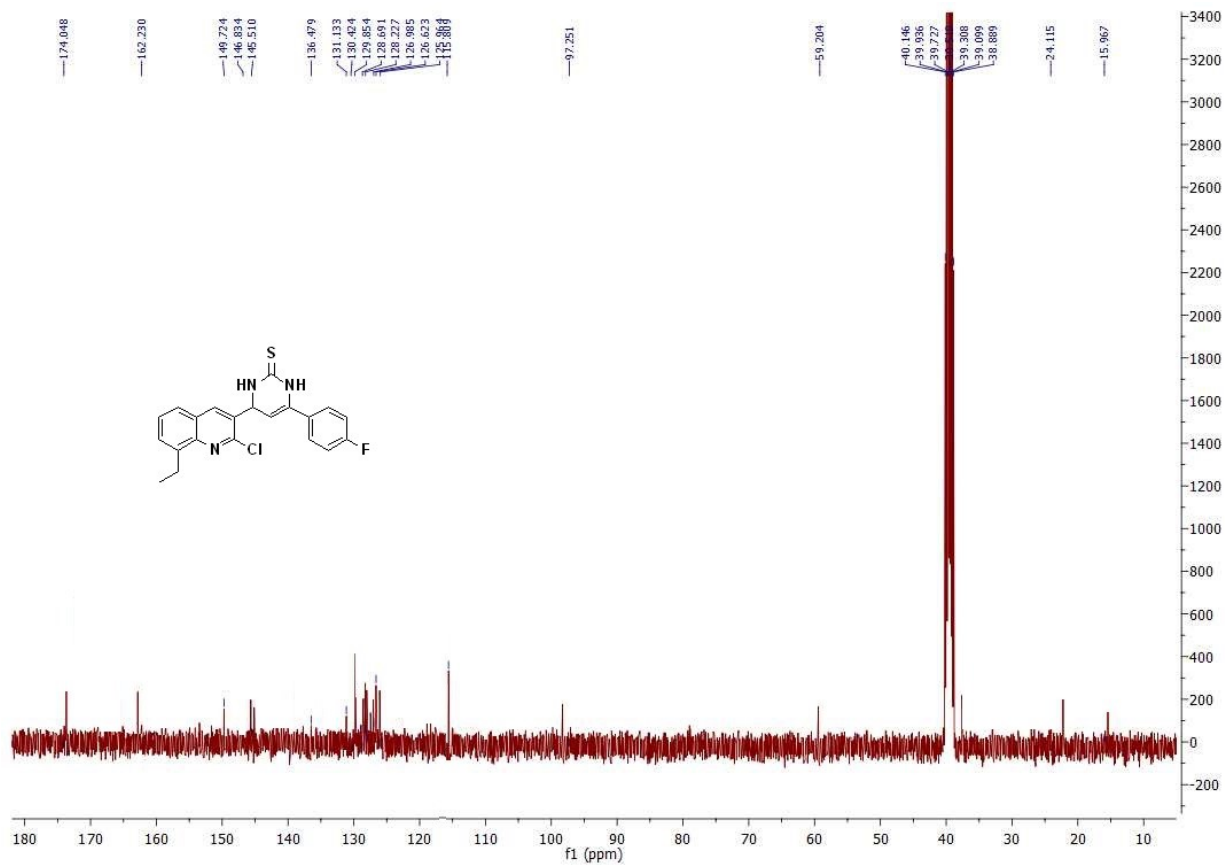

**Fig. S64:**  $^{13}\text{C}$  NMR (100 MHz,  $\text{DMSO-}d_6$ ) spectrum of the compound **6d**.



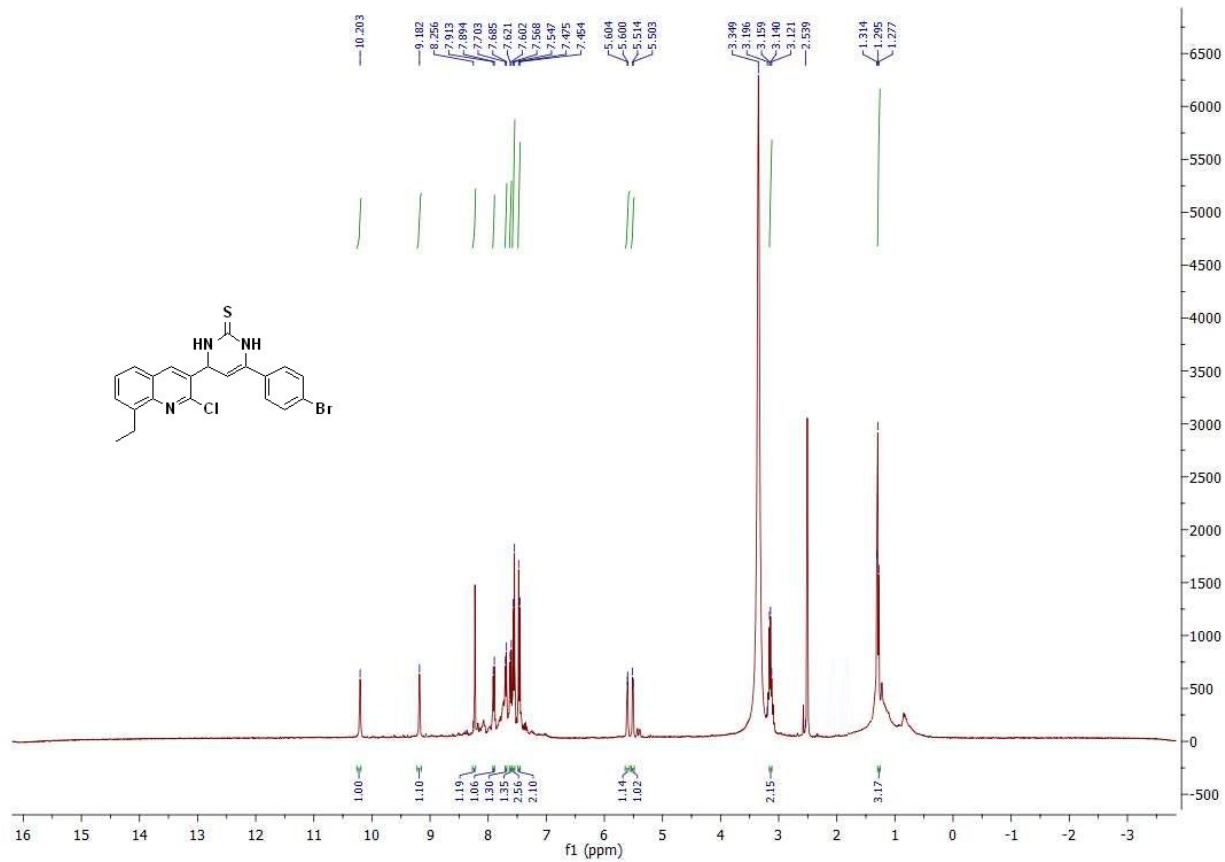

**Fig. S65:**  $^1\text{H}$  NMR (400 MHz,  $\text{DMSO-}d_6$ ) spectrum of the compound **6e**.

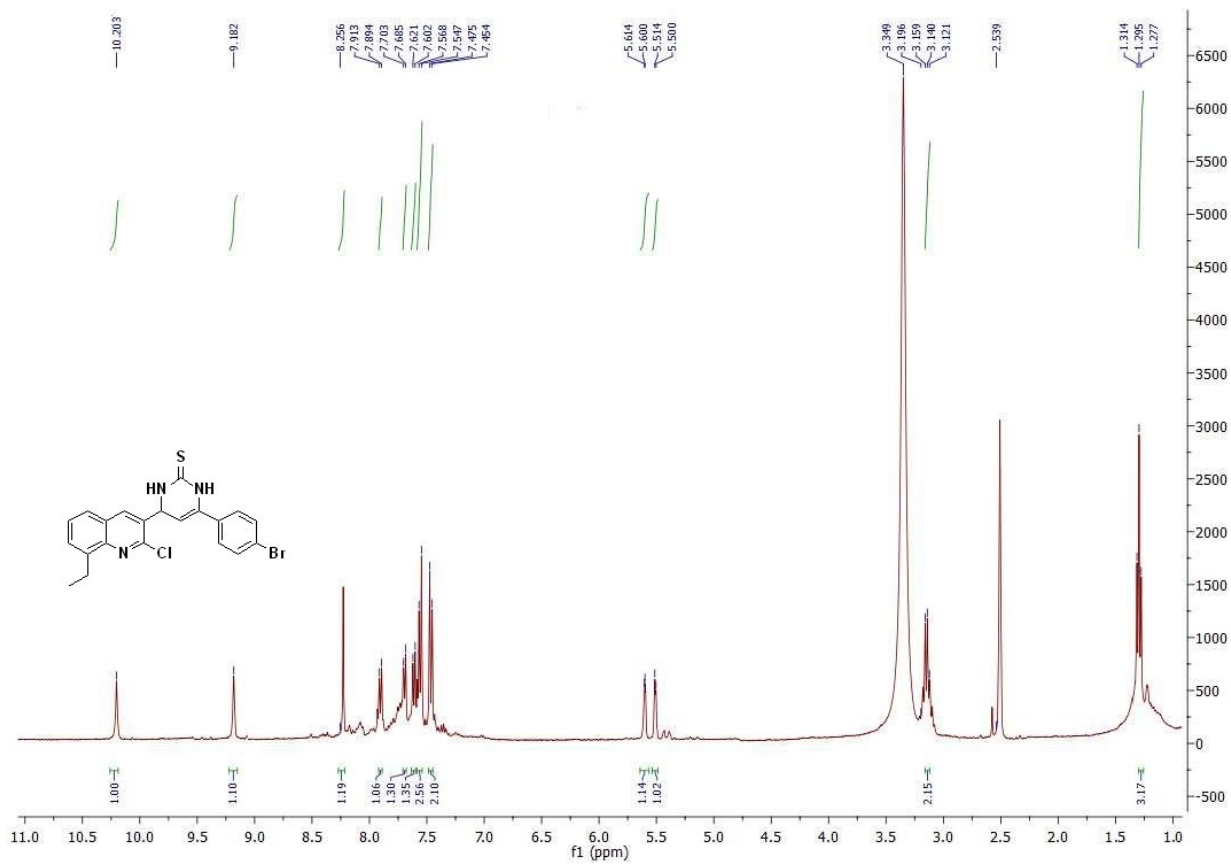

**Fig. S66:**  $^1\text{H NMR}$  (400 MHz,  $\text{DMSO-}d_6$ ) magnified spectrum of the compound **6e**.

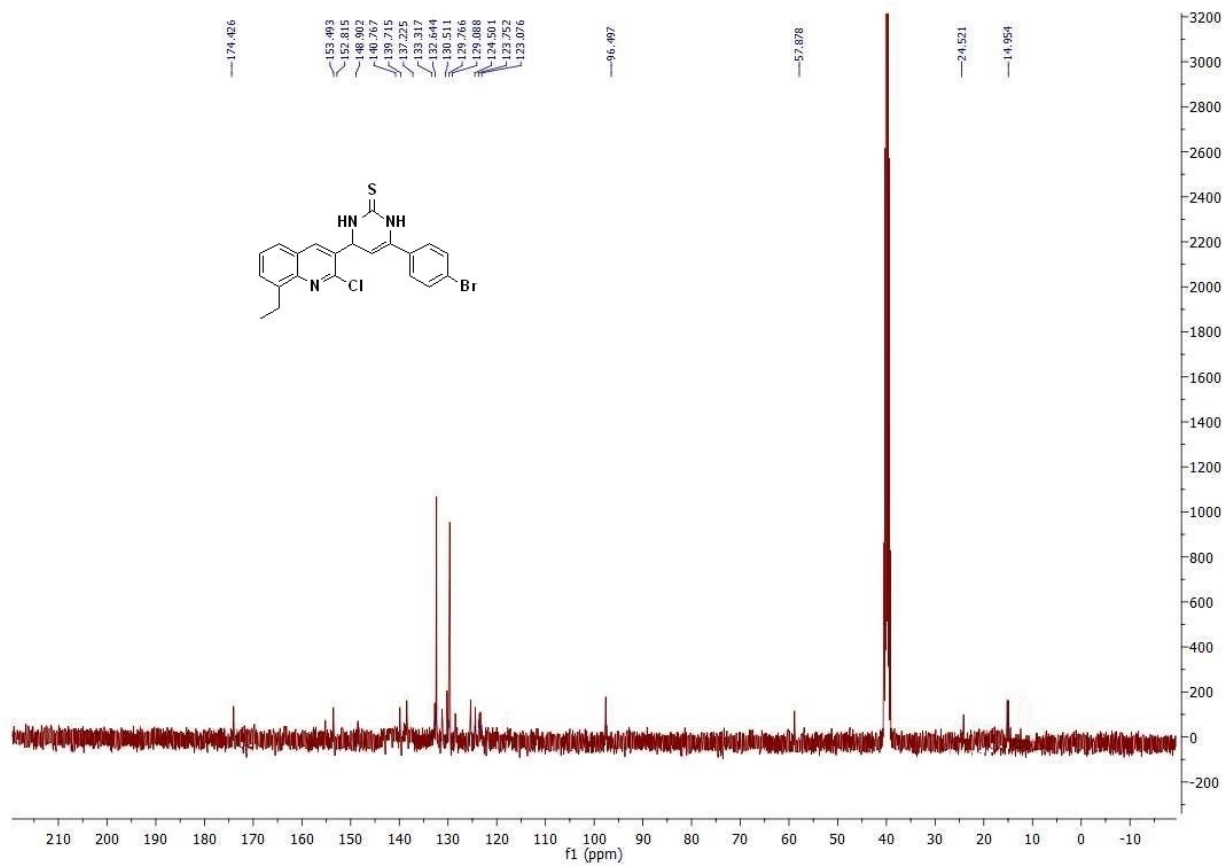

Fig. S67:  $^{13}\text{C}$  NMR (100 MHz,  $\text{DMSO-}d_6$ ) spectrum of the compound 6e.

## The biological studies

Table S1: *In vitro* growth inhibition (GI%) for the NCI60 cancer cell lines upon treatment with 10  $\mu\text{M}$  of Compounds (3a-e and 4a-e).

|                  | 3a    | 3b    | 3c    | 3d | 3e | 4a    | 4b    | 4c           | 4d    | 4e    |
|------------------|-------|-------|-------|----|----|-------|-------|--------------|-------|-------|
| <b>Leukaemia</b> |       |       |       |    |    |       |       |              |       |       |
| CCRF-CEM         | 26.85 | 64.95 | 87.78 | a  | a  | a     | a     | <b>80.39</b> | a     | a     |
| HL-60(TB)        | 45.75 | 61.03 | 73.45 | a  | a  | a     | a     | 71.28        | a     | a     |
| K-652            | a     | 55.74 | 68.13 | a  | a  | 19.93 | 20.02 | 31.45        | 27.17 | 33.46 |
| MOLT-4           | 16.79 | 49.22 | 49.91 | a  | a  | 11.88 | a     | 76.43        | 15    | a     |
| RPMI-8226        | 22.15 | 56.17 | 78.23 | a  | a  | a     | a     | 74.51        | 14.03 | a     |

|                                   |       |              |          |       |    |       |       |          |       |    |
|-----------------------------------|-------|--------------|----------|-------|----|-------|-------|----------|-------|----|
| SR                                | 38.39 | <b>80.06</b> | 61.54    | a     | ND | a     | a     | 77.32    | ND    | ND |
| <b>Non-small cell lung cancer</b> |       |              |          |       |    |       |       |          |       |    |
| A549/ATCC                         | a     | 43.48        | 52.07    | a     | a  | a     | a     | 88.16    | a     | a  |
| EKVX                              | a     | a            | 17.12    | a     | a  | 12.28 | 14.24 | 50.12    | a     | a  |
| HOP-62                            | a     | a            | A        | a     | a  | a     | a     | 87.86    | a     | a  |
| HOP-92                            | 27.31 | 27.39        | 26.83    | a     | a  | 29.84 | 11.29 | <b>L</b> | a     | a  |
| NCI-H226                          | 79.88 | <b>L</b>     | <b>L</b> | a     | a  | 15.4  | a     | <b>L</b> | 14.27 | a  |
| NCI-H23                           | a     | 20.25        | 27.39    | a     | a  | a     | a     | 68.61    | 12.04 | a  |
| NCI-H322M                         | a     | 22.35        | 31.08    | a     | a  | a     | a     | 53.67    | a     | a  |
| NCI-H460                          | a     | 27.68        | 18.35    | a     | a  | a     | a     | 58.58    | a     | a  |
| NCI-H522                          | 21.13 | 41.47        | 80.68    | a     | a  | 11.87 | 14.74 | <b>L</b> | a     | a  |
| <b>Colon Cancer</b>               |       |              |          |       |    |       |       |          |       |    |
| COLO 205                          | a     | 22.4         | 18.42    | a-    | a  | a     | a     | a        | a     | a  |
| HCC-2998                          | a     | 17.71        | 63.82    | a     | a  | a     | a     | 46.95    | a     | a  |
| HCT-116                           | a     | 62.78        | 61.58    | a     | a  | a     | a     | 69.06    | a     | a  |
| HCT-15                            | a     | 20.39        | 44.52    | a     | a  | a     | a     | 35.78    | 11.14 | a  |
| HT29                              | a     | 26.93        | 77.4     | a     | a  | a     | a     | a        |       | a  |
| KM12                              | a     | 23.52        | 80.66    | a     | a  | a     | a     | 55.14    | a     | a  |
| SW-620                            | a     | 72.24        | 65.44    | a     | a  | a     | a     | 17.43    | a     | a  |
| <b>CNS Cancer</b>                 |       |              |          |       |    |       |       |          |       |    |
| SF-268                            | a     | a            | 32.21    | a     | a  | 21.44 | 16.08 | 34.36    | a     | a  |
| SF-295                            | a     | 21.83        | 31.32    | a     | a  | 16.73 | a     | 96.38    | a     | a  |
| SF-539                            | 18.88 | 99.38        | <b>L</b> | 11.01 | a  | a     | a     | <b>L</b> | a     | a  |
| SNB-19                            | a     | 54.44        | 66.41    | a     | a  | a     | a     | 89.58    | a     | a  |
| SNB-75                            | a     | <b>L</b>     | 61.72    | a     | a  | 45.69 | 29.64 | <b>L</b> | a     | a  |
| U251                              | 17.87 | 65.25        | 78.15    | a     | a  | a     | a     | <b>L</b> | a     | a  |
| <b>Melanoma</b>                   |       |              |          |       |    |       |       |          |       |    |
| LOX IMVI                          | 11.32 | 43.44        | 71.98    | a     | a  | a     | a     | 91.58    | 15.3  | a  |

|                        |       |       |          |      |       |       |       |          |       |       |
|------------------------|-------|-------|----------|------|-------|-------|-------|----------|-------|-------|
| MALME-3M               | a     | a     | 14.77    | a    | a     | a     | a     | 89.41    | a     | a     |
| M14                    | a     | a     | 31.93    | a    | a     | a     | a     | 42.76    |       | a     |
| MDA-MB-435             | a     | 17.15 | 59.18    | a    | a     | a     | a     | 56.48    | a     | a     |
| SK-MEL-2               | a     | a     | 44.49    | a    | a     | a     | a     | 29.76    | a     | a     |
| SK-MEL-28              | a     | a     | 15.04    | a    | a     | a     | a     | 68.91    | a     | a     |
| SK-MEL-5               | a     | 23.24 | 39.88    | a    | a     | 13.93 | a     | 78.58    | 16.75 | 12.97 |
| UACC-257               | a     | a     | 43.59    | a    | a     | a     | a     | 26.54    | a     | a     |
| UACC-62                | 17.15 | 35.88 | 41.92    | a    | a     | a     | a     | <b>L</b> | 16.46 | a     |
| <b>Ovarian Cancer</b>  |       |       |          |      |       |       |       |          |       |       |
| IGROV1                 | a     | a     | a        | a    | a     | a     | a     | 66.3     | a     | a     |
| OVCAR-3                | a     | 31.69 | <b>L</b> | a    | a     | a     | a     | <b>L</b> | a     | a     |
| OVCAR-4                | 13.47 | 42.33 | 41.97    | a    | a     | 21.9  | 14.03 | <b>L</b> | 11.03 | 10.78 |
| OVCAR-5                | a     | 12.51 | 26.77    | a    | a     | a     | a     | 33.33    | a     | a     |
| OVCAR-8                | a     | 57.79 | 84       | a    | a     | a     | a     | 92.11    | a     | a     |
| NCI/ADR-RES            | a     | 45.75 | 67.57    | a    | a     | a     | a     | 59.91    | a     | a     |
| SK-OV-3                | a     | a     | 17.38    | a    | a     | a     | a     | 61.41    | a     | 11.74 |
| <b>Renal Cancer</b>    |       |       |          |      |       |       |       |          |       |       |
| 786-0                  | a     | 25.74 | 41.69    | a    | a     | 11.45 | a     | <b>L</b> | a     | a     |
| A498                   | a     | a     | a        | a    | a     | a     | a     | <b>L</b> | a     | a     |
| ACHN                   | a     | 24.48 | 32.01    | a    | a     | a     | a     | 75.69    | a     | a     |
| CAKI-1                 | 19.34 | 40.25 | 38.71    | 11.8 | 12.83 | 34.88 | 39.22 | 95.06    | 19.48 | 17.59 |
| RXF 393                | 23.77 | 22.09 | 42.58    | a    | a     | a     | 33.79 | <b>L</b> | a     | a     |
| SN12C                  | a     | 23.68 | 42.34    | a    | a     | a     | a     | <b>L</b> | a     | a     |
| TK-10                  | a     | a     | a        | a    | a     | a     | a     | <b>L</b> | a     | a     |
| UO-31                  | a     | 41.81 | 45.05    | a    | a     | a     | a     | <b>L</b> | 27.95 | 17.79 |
| <b>Prostate Cancer</b> |       |       |          |      |       |       |       |          |       |       |
| PC-3                   | a     | 32.05 | 53.5     | a    | a     | a     | a     | 67.59    | a     | a     |
| DU-145                 | a     | 15.79 | 29.03    | a    | a     | a     | a     | 80.55    | a     | a     |

| <b>Breast Cancer</b> |       |       |       |   |   |       |       |       |       |       |
|----------------------|-------|-------|-------|---|---|-------|-------|-------|-------|-------|
| MCF7                 | 18.04 | 37.15 | 70.94 | a | a | 16.04 | 11.32 | 54.75 | 24.64 | 20.65 |
| MDA-MB-231/ATCC      | a     | 29.32 | 39.55 | a | a | 10.04 | a     | L     | 19.85 | a     |
| HS 578T              | a     | a     | a     | a | a | 14.91 | 10.34 | L     | a     | a     |
| BT-549               | 22.52 | 50.34 | 76.12 | a | a | 15.31 | a     | 57.52 | 17.79 | 27.68 |
| T-47D                | 44.03 | 57.87 | 72.8  | a | a | 17.11 | 16.55 | 91.56 | 14.44 | a     |
| MDA-MB-468           | a     | 39.76 | 61.14 | a | a | 13.97 | a     | 51.91 | a     | a     |

a=GI % < 10

L= Letha

ND=Not Determined

**Table S2: *In vitro* growth inhibition percent (GI%) for the NCI60 cancer cell lines upon treatment with 10  $\mu$ M of Compounds (5a-e and 6a-e)**

|                                   | 5a    | 5b    | 5c    | 5d    | 5e    | 6a | 6b    | 6c    | 6d    | 6e    |
|-----------------------------------|-------|-------|-------|-------|-------|----|-------|-------|-------|-------|
| <b>Leukaemia</b>                  |       |       |       |       |       |    |       |       |       |       |
| CCRF-CEM                          | a     | 28.8  | 57.63 | a     | a     | a  | 11    | 32.85 | a     | a     |
| HL-60(TB)                         | 14.94 | a     | 51.76 | a     | a     | a  | 10.73 | 41.55 | a     | a     |
| K-652                             | 28.78 | 27.99 | 33.86 | 29.26 | a     | a  | 10.53 | 44.64 | 27.55 | a     |
| MOLT-4                            | 12.65 | 44.31 | 61.16 | 26.8  | a     | a  | 53.3  | 67.65 | 48.79 | 26.25 |
| RPMI-8226                         | 15.71 | 29.16 | 63.06 | 23.03 | 14.71 | a  | 36.1  | 57.59 | 19.32 | 10.65 |
| SR                                | 11.58 | a     | 49.05 | ND    | ND    | ND | ND    | ND    | ND    | ND    |
| <b>Non-small cell lung cancer</b> |       |       |       |       |       |    |       |       |       |       |
| A549/ATCC                         | a     | 19.71 | 38.11 | a     | a     | a  | a     | 26.33 | a     | a     |
| EKVX                              | 10.28 | 23.9  | 34.88 | 19.65 | a     | a  | a     | 37.93 | a     | a     |
| HOP-62                            | a     | a     | 10.62 | a     | a     | a  | 10.96 | 10.46 | 15.15 | a     |
| HOP-92                            | 36.16 | 47.37 | 77.38 | 11.4  | a     | a  | a     | 28.27 | a     | a     |
| NCI-H226                          | 15.89 | 20.27 | 63.27 | 25.9  | a     | a  | 15.39 | 57.97 | 21.71 | a     |
| NCI-H23                           | 11.79 | 20.32 | 33.67 | 16.45 | a     | a  | a     | 25.78 | 11.77 | a     |

|                     |       |       |       |       |       |       |       |       |       |       |
|---------------------|-------|-------|-------|-------|-------|-------|-------|-------|-------|-------|
| NCI-H322M           | 17.55 | a     | 33.97 | 12.42 | a     | a     | a     | 18.3  | a     | a     |
| NCI-H460            | a     | a     | 21.83 | a     | a     | a     | a     | 29.96 | a     | a     |
| NCI-H522            | 19.63 | a     | 65.68 | 11.75 | a     | a     | 22.15 | 50.3  | 25.04 | a     |
| <b>Colon Cancer</b> |       |       |       |       |       |       |       |       |       |       |
| COLO 205            | a     | a     | 12.69 | a     | a     | a     | a     | 24.36 | a     | a     |
| HCC-2998            | a     | a     | 33.01 | a     | a     | a     | a     | 26.08 | a     | a     |
| HCT-116             | 14.77 | a     | 27.1  | a     | a     | a     | 17.19 | 41.18 | 21.51 | 10.5  |
| HCT-15              | a     | 12.16 | 28.96 | 14.84 | a     | a     | a     | 30.95 | 26.18 | a     |
| HT29                | a     | -     | 20.39 | a     | a     | a     | a     | 36.36 | 28.26 | 11.92 |
| KM12                | a     | 19.91 | 37.2  | a     | a     | a     | a     | 28.05 | 13.15 | a     |
| SW-620              | a     | a     | 10.03 | a     | a     | a     | a     | 13.45 | a     | a     |
| <b>CNS Cancer</b>   |       |       |       |       |       |       |       |       |       |       |
| SF-268              | 23.06 | 32.23 | 31.72 | 21.02 | a     | a     | 16.63 | 42.42 | 14.86 | a     |
| SF-295              | 13.79 | 16.52 | 30.97 | 12.28 | a     | a     | a     | 29.97 | a     | a     |
| SF-539              | a     | 21.97 | 29.68 | a     | a     | a     | a     | 30.33 | a     | a     |
| SNB-19              | 13.2  | 22.6  | 39.09 | 10.5  | a     | a     | a     | 23.35 | a     | a     |
| SNB-75              | 21.56 | 10.81 | a     | 39.15 | 19.75 | 14.94 | a     | 23.2  | a     | a     |
| U251                | a     | 13.68 | 30.97 | a     | a     | a     | a     | 26.6  | a     | a     |
| <b>Melanoma</b>     |       |       |       |       |       |       |       |       |       |       |
| LOX IMVI            | a     | a     | 38.34 | 12.37 | a     | a     | a     | 33.32 | a     | a     |
| MALME-3M            | a     | a     | a     | a     | a     | a     | a     | a     | a     | a     |
| M14                 | a     | a     | 31.17 | a     | 10.98 | 13.19 | a     | 30.14 | 10.84 | a     |
| MDA-MB-435          | a     | a     | 24.92 | a     | a     | a     | a     | 43.45 | a     | a     |
| SK-MEL-2            | a     | a     | 33.02 | a     | a     | a     | a     | 10.15 | a     | a     |
| SK-MEL-28           | a     | a     | a     | a     | a     | a     | a     | -     | a     | a     |
| SK-MEL-5            | a     | 21.02 | 52.17 | 15.32 | a     | a     | 14.13 | 38.21 | a     | a     |
| UACC-257            | a     | a     | 20.13 | a     | a     | a     | a     | 13.06 | a     | a     |
| UACC-62             | 20.48 | 19.06 | 33.49 | 25.7  | a     | 10.41 | 10.28 | 35.55 | 14.25 | a     |

| <b>Ovarian Cancer</b>  |       |       |       |       |       |       |       |       |       |       |
|------------------------|-------|-------|-------|-------|-------|-------|-------|-------|-------|-------|
| IGROV1                 | 12.91 | a     | 33.4  | 28.58 | a     | a     | a     | 14.31 | a     | a     |
| OVCAR-3                | a     | a     | 16.86 | -     | a     | a     | a     | 14.21 | a     | a     |
| OVCAR-4                | 24.5  | 22.4  | 41.62 | 13.35 | a     | a     | 19.9  | 48.88 | 21.02 | 10.18 |
| OVCAR-5                | a     | a     | a     | a     | a     | a     | a     | A     | a     | a     |
| OVCAR-8                | 10.13 | 31.46 | 36.71 | a     | a     | a     | a     | 12.25 | a     | a     |
| NCI/ADR-RES            | a     | 24.86 | 28.5  | a     | a     | a     | 11.1  | 34.01 | 16.96 | a     |
| SK-OV-3                | a     | a     | a     | 20.89 | 11.18 | 14.95 | a     | a     | a     | 10.74 |
| <b>Renal Cancer</b>    |       |       |       |       |       |       |       |       |       |       |
| 786-0                  | a     | 18.71 | 27.85 | a     | a     | a     | a     | 18.24 | a     | a     |
| A498                   | a     | -     | 18.77 | a     | a     | a     | a     | 11.59 | a     | a     |
| ACHN                   | a     | 15.69 | 32.54 | a     | a     | a     | a     | 24.38 | a     | a     |
| CAKI-1                 | 44.69 | 45.79 | 69.81 | 31.08 | 20.05 | 16.19 | 30.19 | 64.11 | 26.14 | 10.37 |
| RXF 393                | 20.63 | 24.58 | 37.29 | a     | a     | a     | a     | 40.65 | a     | a     |
| SN12C                  | 10.35 | 21.7  | 39.67 | a     | a     | a     | a     | 21.68 | a     | a     |
| TK-10                  | a     | a     | a     | a     | a     | a     | a     | 12.62 | a     | a     |
| UO-31                  | 19.73 | 23.28 | 45.23 | 40.15 | 24.05 | 18.59 | 37.17 | 67.70 | 49.53 | 32.66 |
| <b>Prostate Cancer</b> |       |       |       |       |       |       |       |       |       |       |
| PC-3                   | a     | 21.34 | 48.91 | 4.57  | a     | a     | a     | 46.18 | 22.02 | a     |
| DU-145                 | a     | 20.2  | 32.26 | -     | a     | a     | a     | 21.68 | a     | a     |
| <b>Breast Cancer</b>   |       |       |       |       |       |       |       |       |       |       |
| MCF7                   | 20.75 | 26.65 | 46.53 | 40.43 | 19.71 | a     | 15.73 | 44.31 | 24.62 | 18.42 |
| MDA-MB-231/ATCC        | 18.14 | 19.15 | 52.51 | 31.21 | 12.89 | a     | a     | 46.06 | a     | a     |
| HS 578T                | 19.77 | 23.11 | 32.67 | 18.23 | a     | a     | 12.89 | 39.64 | a     | a     |
| BT-549                 | 20.39 | 28.17 | 21.06 | 12.24 | a     | a     | 12.82 | 10.52 | a     | a     |
| T-47D                  | 12.67 | 41.08 | 60.59 | 21.1  | 10.4  | a     | 24.95 | 48.61 | 23.88 | a     |
| MDA-MB-468             | 18.66 | 22.77 | 50.55 | 13.97 | a     | a     | 13.21 | 40.49 | -     | a     |

a=GI % < 10

L= Letha



ND=Not Determined

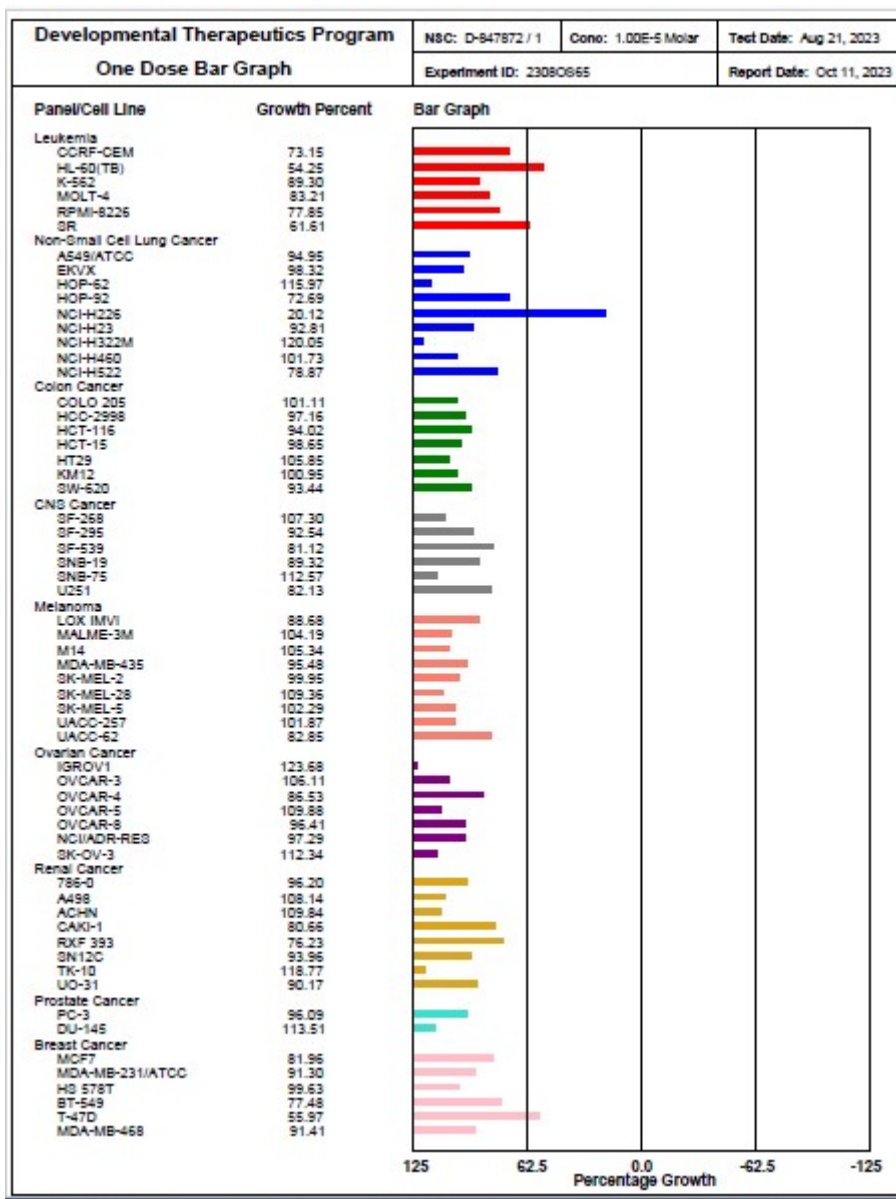

Fig. S68: *In vitro* growth (G%) for the NCI60 cancer cell lines upon treatment with 10  $\mu$ M of Compound 3a

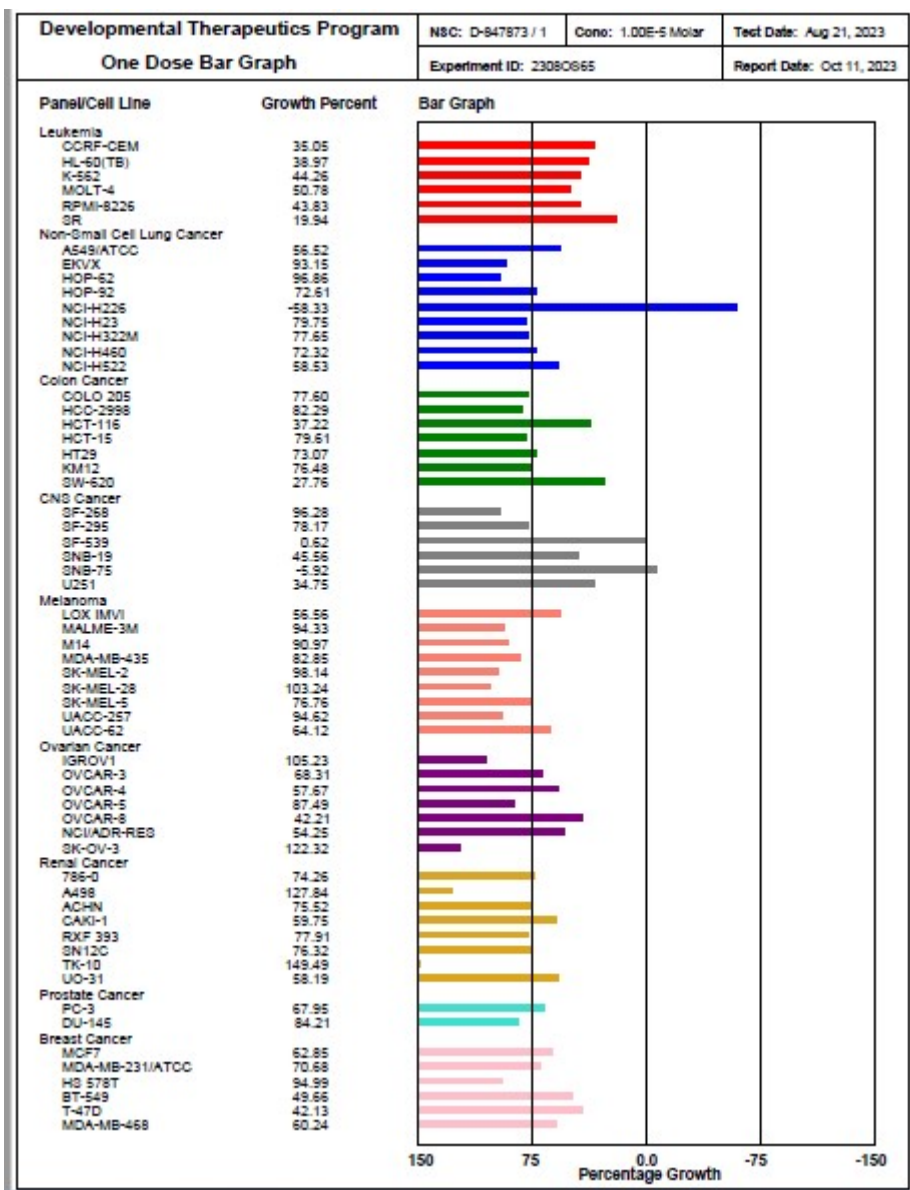

Fig. S69: *In vitro* growth (G%) for the NCI60 cancer cell lines upon treatment with 10  $\mu$ M of Compound 3b

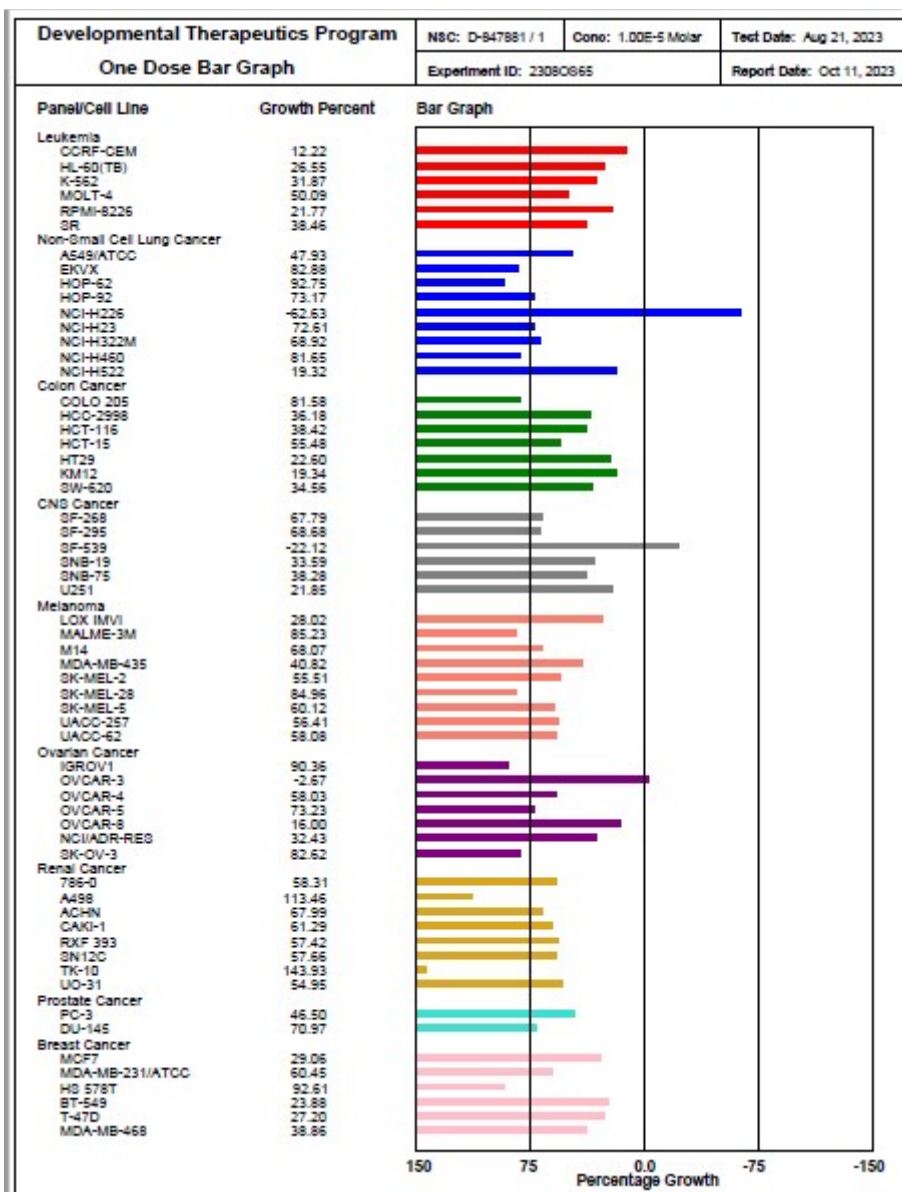

**Fig. S70: *In vitro* growth (G%) for the NCI60 cancer cell lines upon treatment with 10  $\mu$ M of Compound 3c**

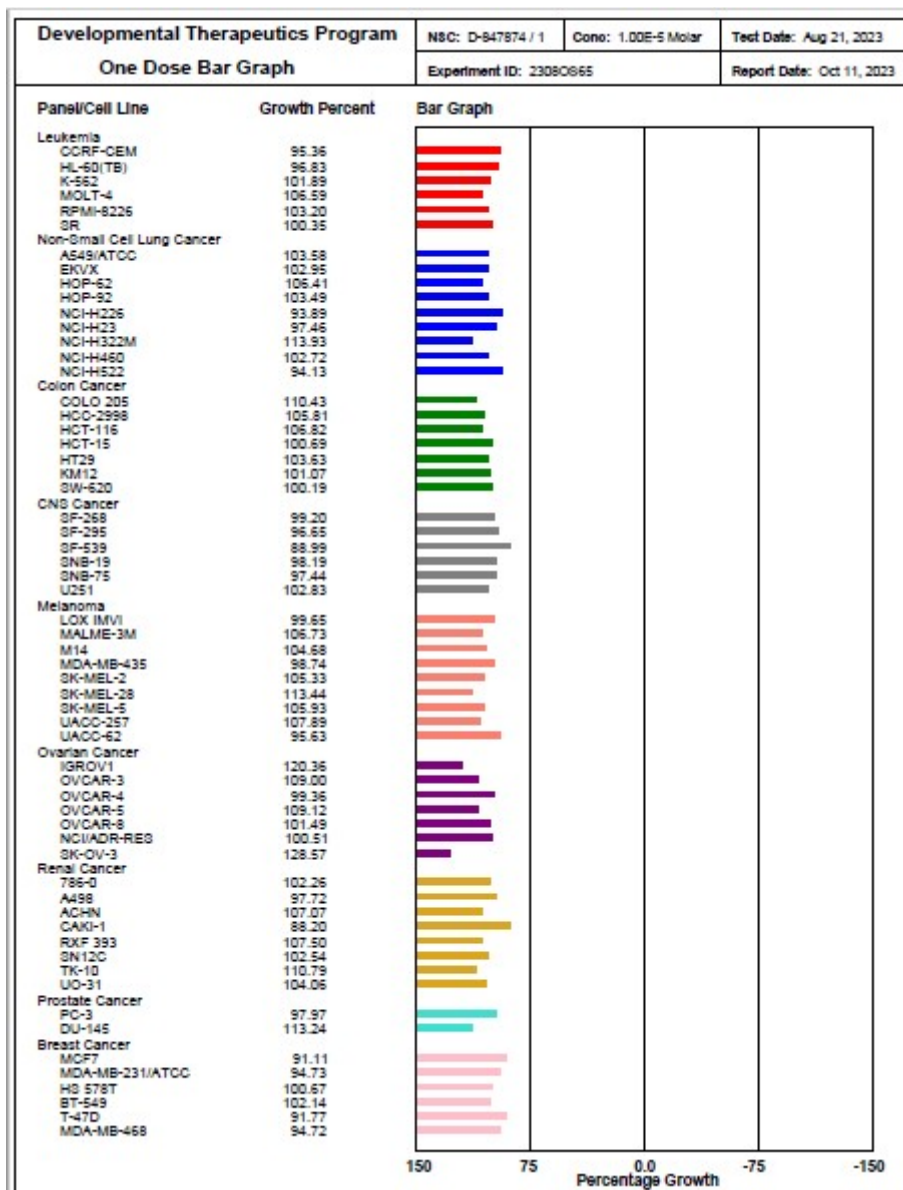

**Fig. S71: *In vitro* growth (G%) for the NCI60 cancer cell lines upon treatment with 10  $\mu$ M of Compound 3d**

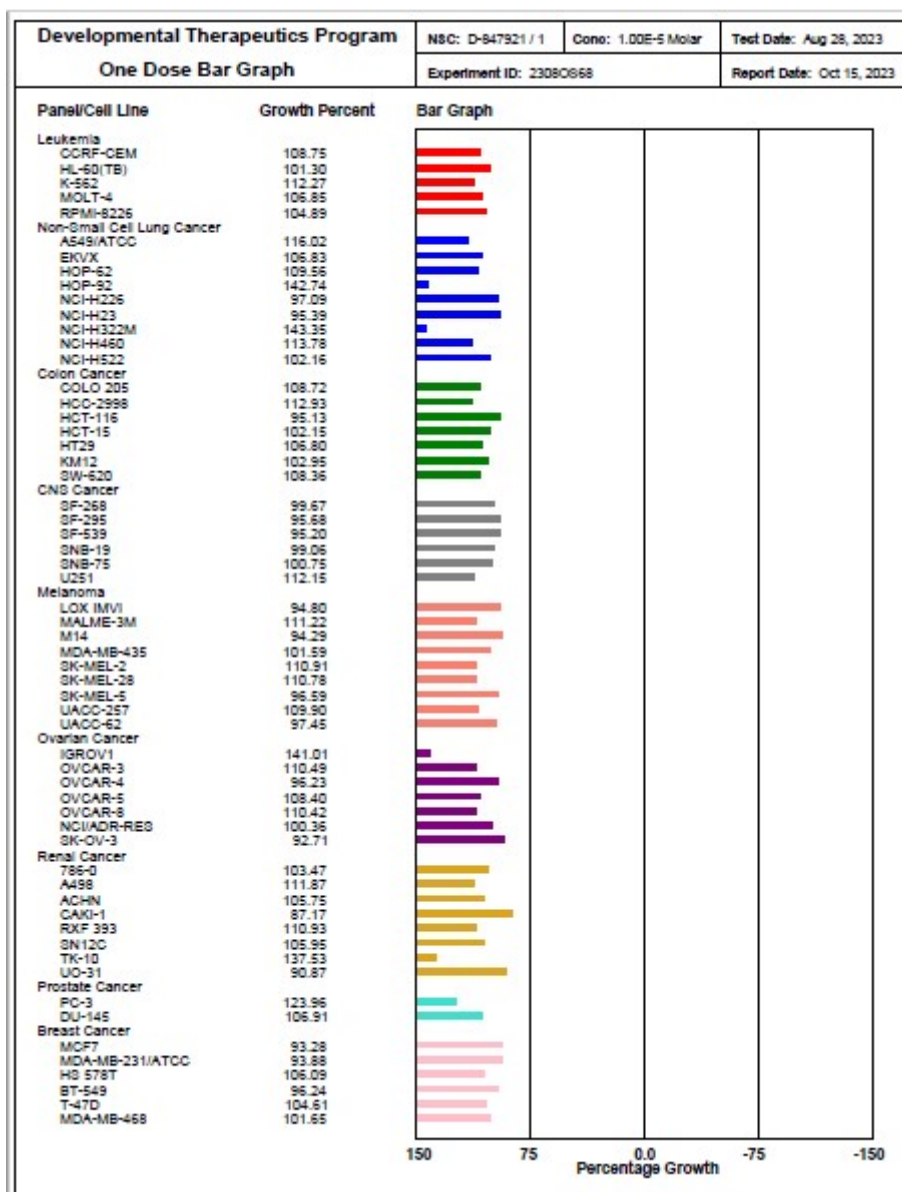

**Fig. S72: *In vitro* growth (G%) for the NCI60 cancer cell lines upon treatment with 10  $\mu$ M of Compound 3e**

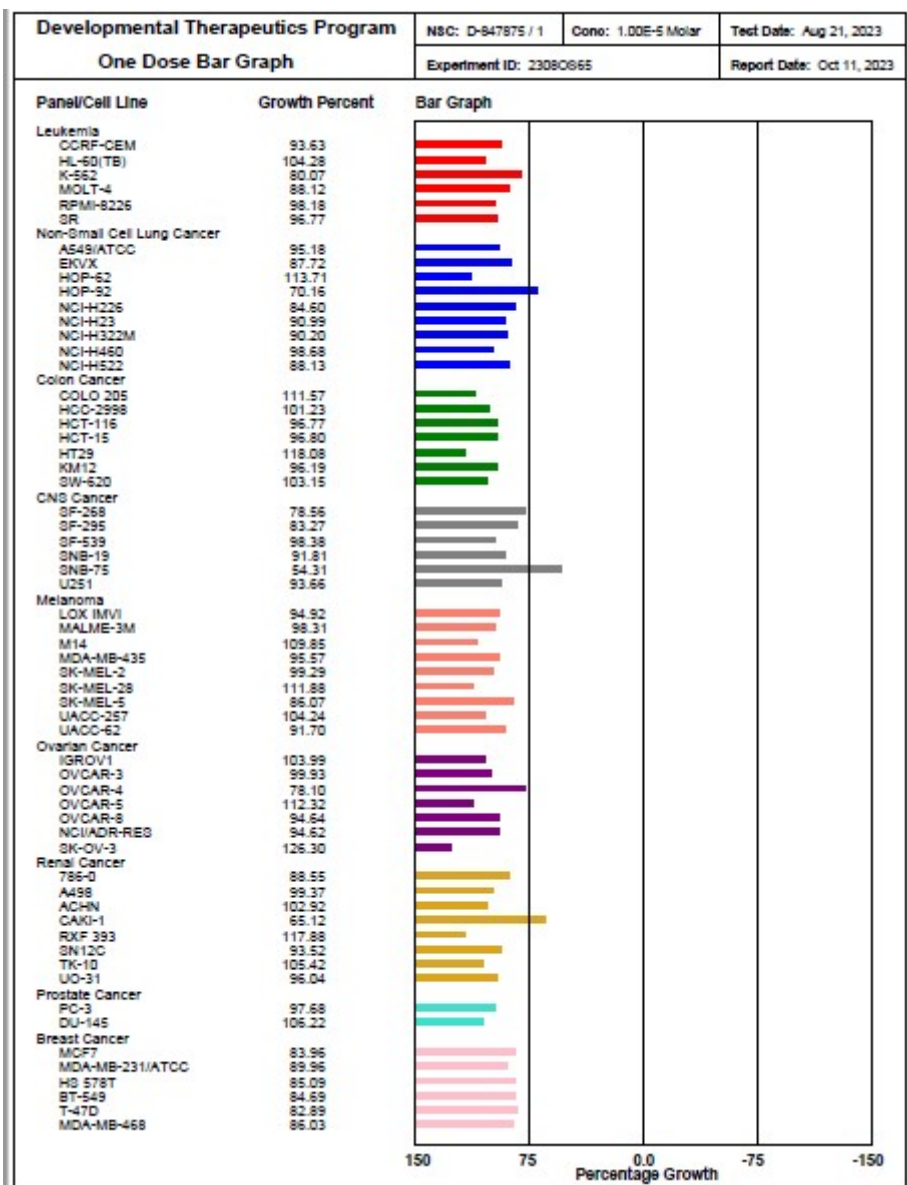

**Fig. S73: *In vitro* growth (G%) for the NCI60 cancer cell lines upon treatment with 10  $\mu$ M of Compound 4a**

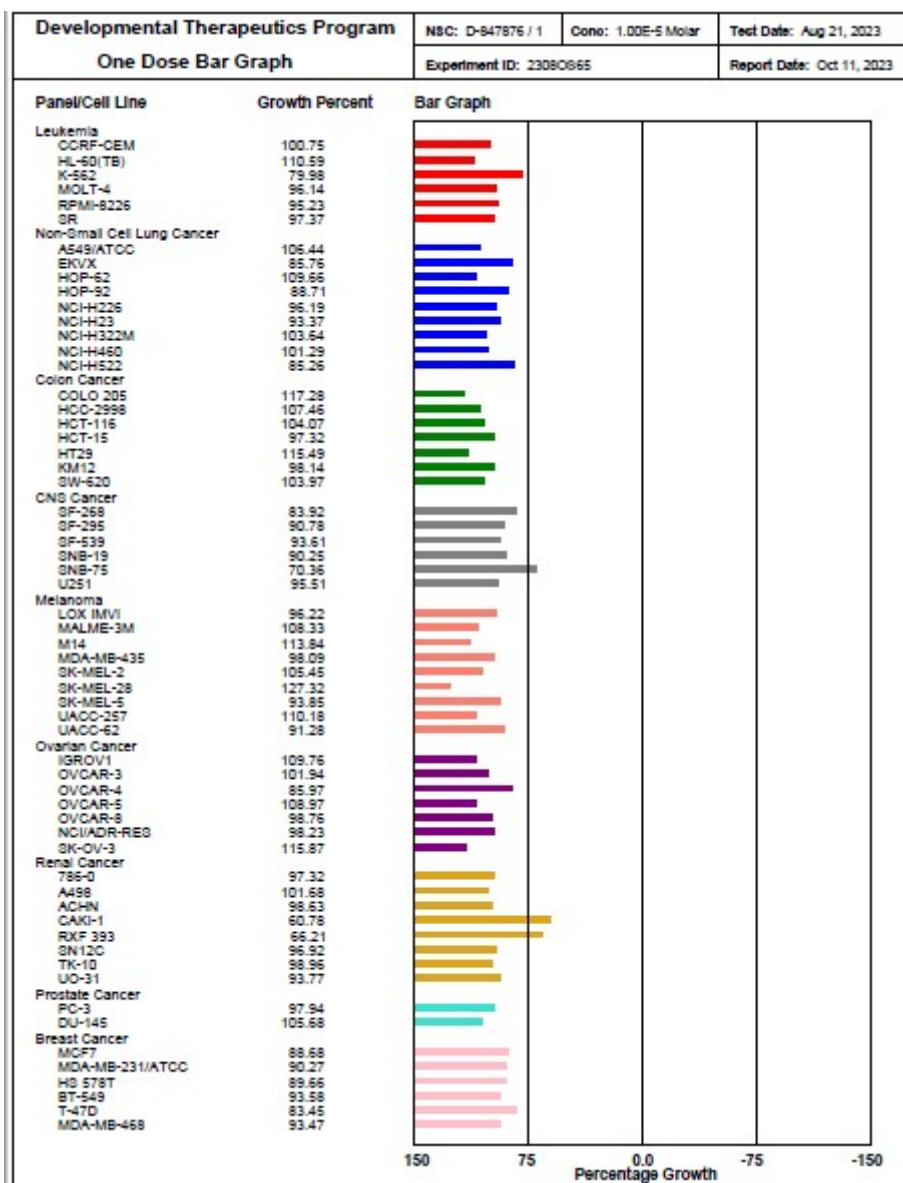

Fig. S74: *In vitro* growth (G%) for the NCI60 cancer cell lines upon treatment with 10  $\mu$ M of Compound 4b

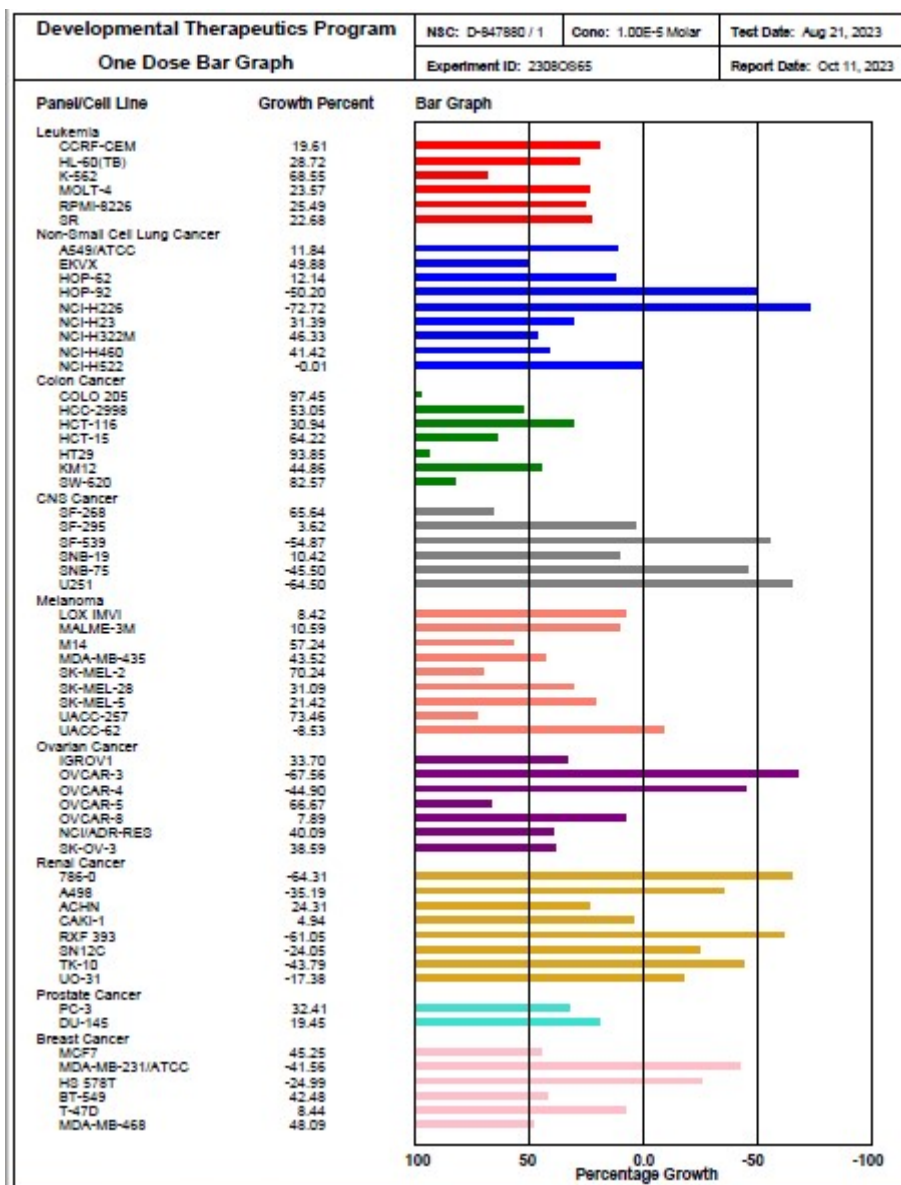

Fig. S75: *In vitro* growth (G%) for the NCI60 cancer cell lines upon treatment with 10  $\mu$ M of Compound 4c



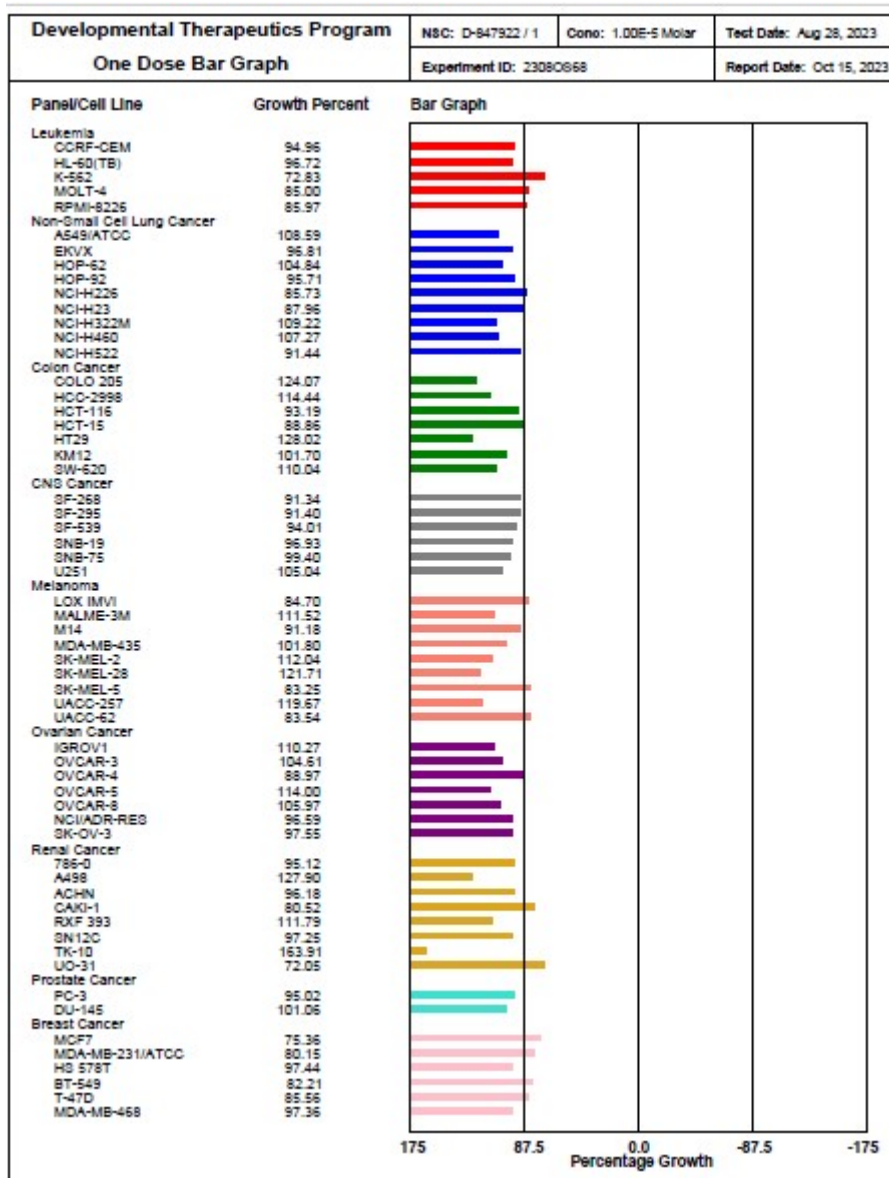

**Fig. S76: *In vitro* growth (G%) for the NCI60 cancer cell lines upon treatment with 10  $\mu$ M of Compound 4d**

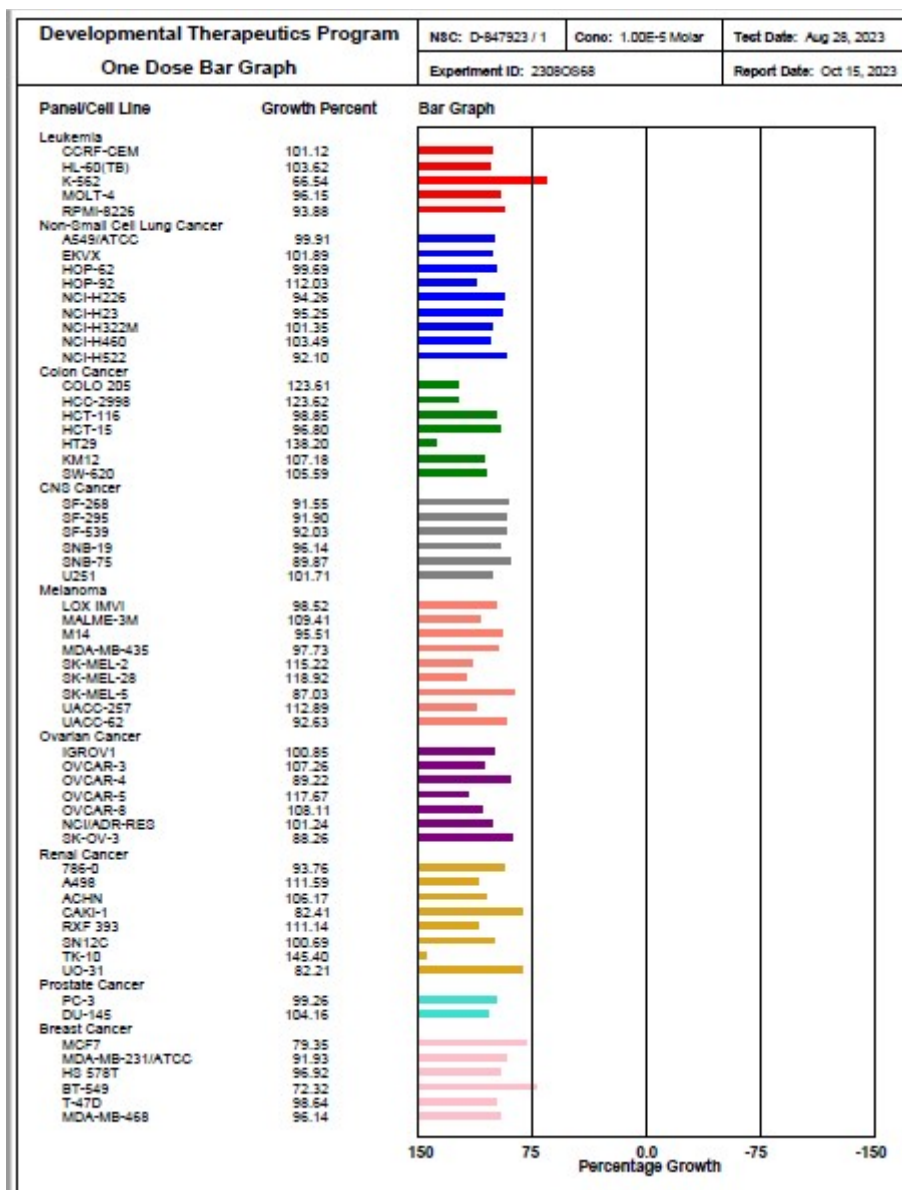

**Fig. S77: *In vitro* growth (G%) for the NCI60 cancer cell lines upon treatment with 10  $\mu$ M of Compound 4e**

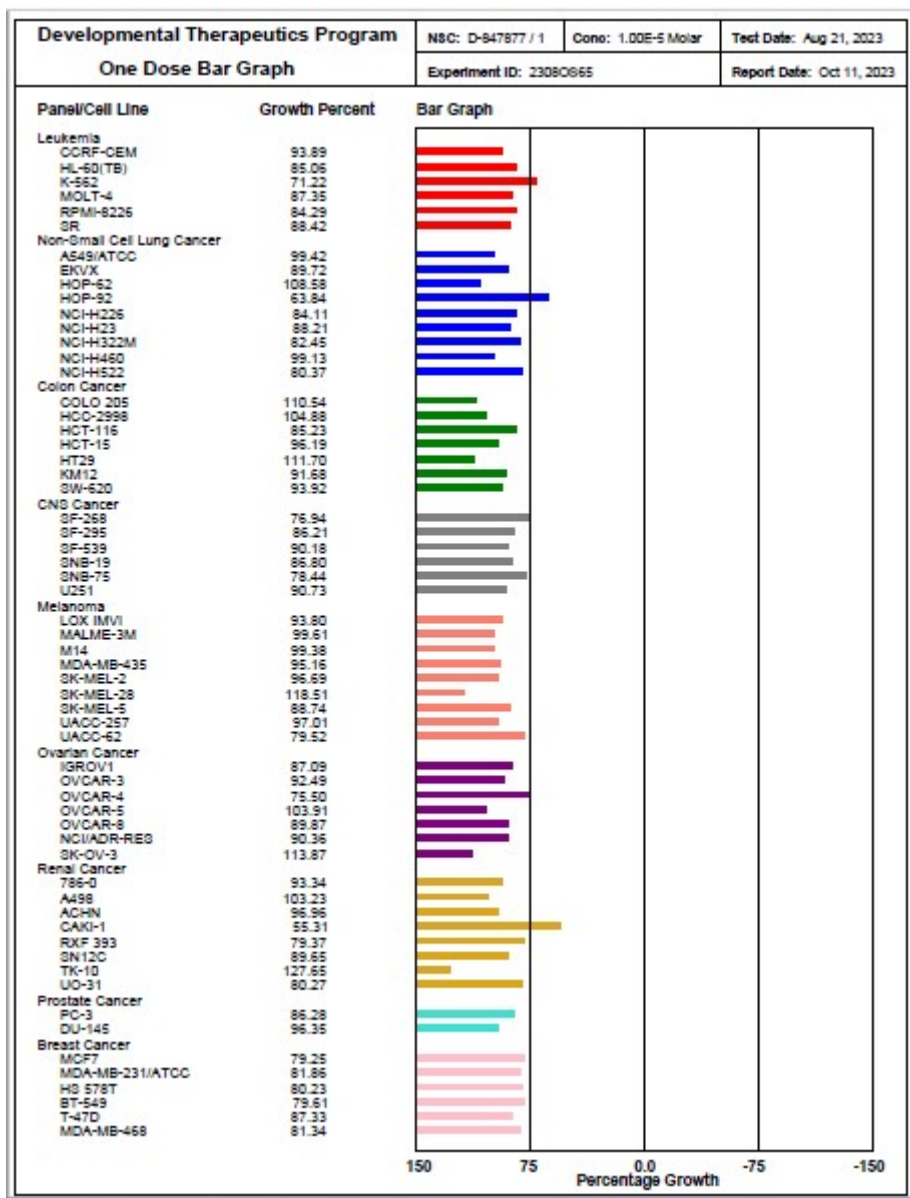

**Fig. S78: *In vitro* growth (G%) for the NCI60 cancer cell lines upon treatment with 10  $\mu$ M of Compound 5a**

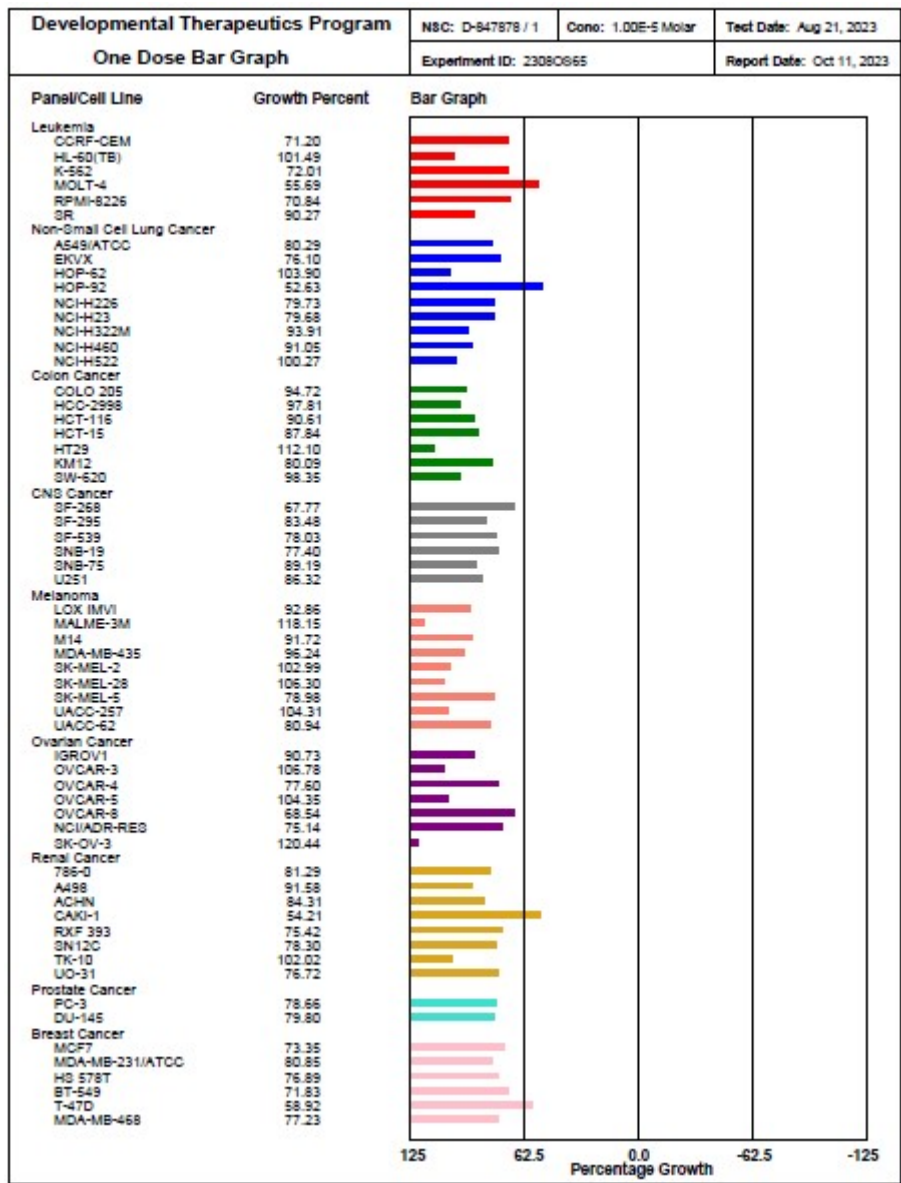

**Fig. S79: *In vitro* growth (G%) for the NCI60 cancer cell lines upon treatment with 10  $\mu$ M of Compound 5b**

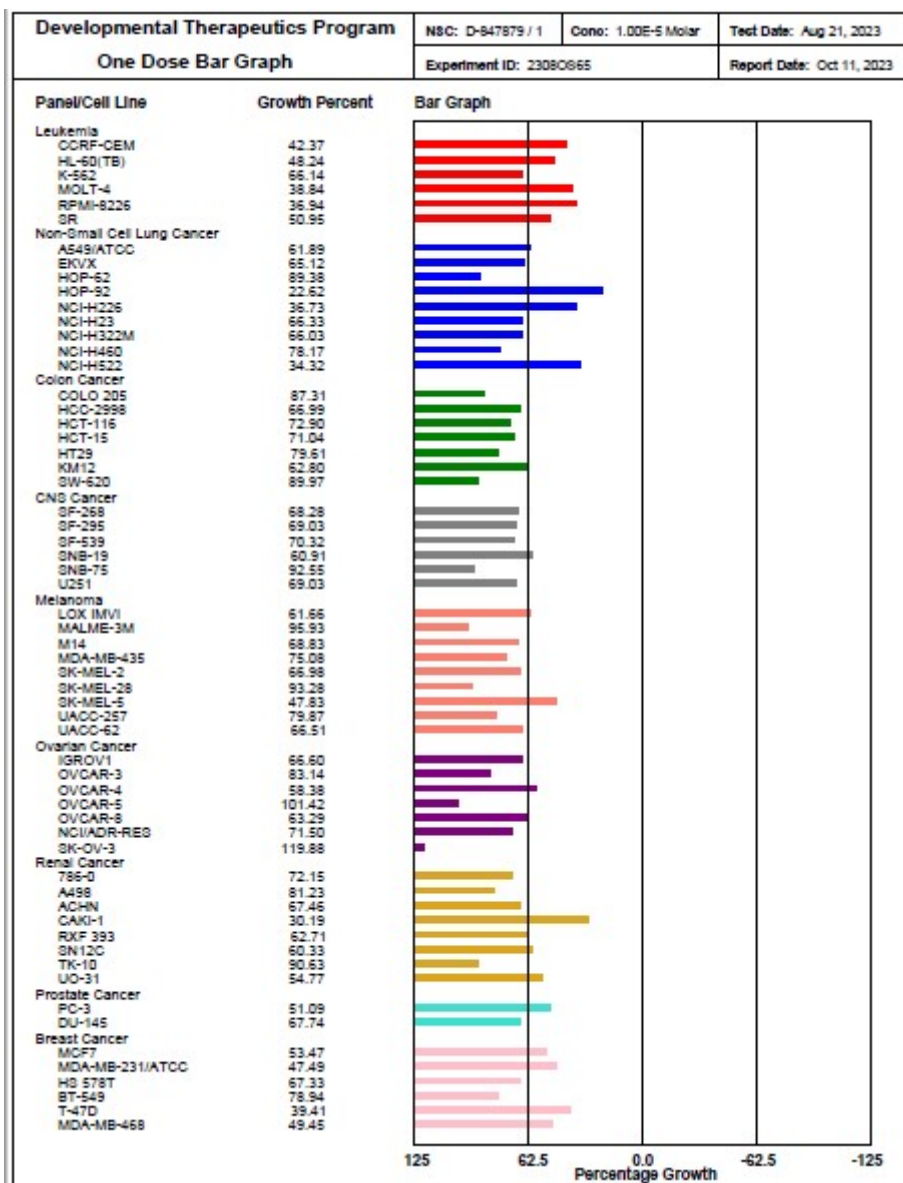

**Fig. S80: *In vitro* growth (G%) for the NCI60 cancer cell lines upon treatment with 10  $\mu$ M of Compound 5c**

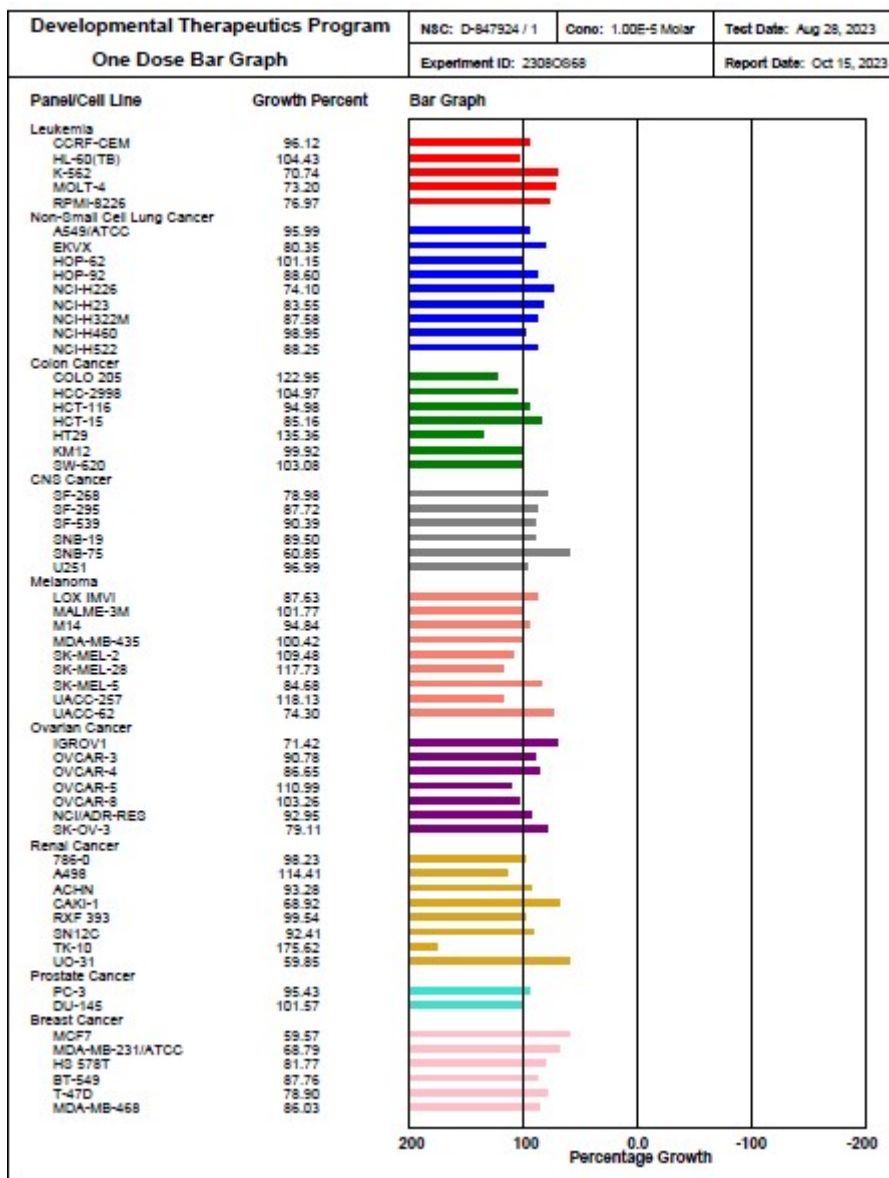

**Fig. S81: *In vitro* growth (G%) for the NCI60 cancer cell lines upon treatment with 10  $\mu$ M of Compound 5d**

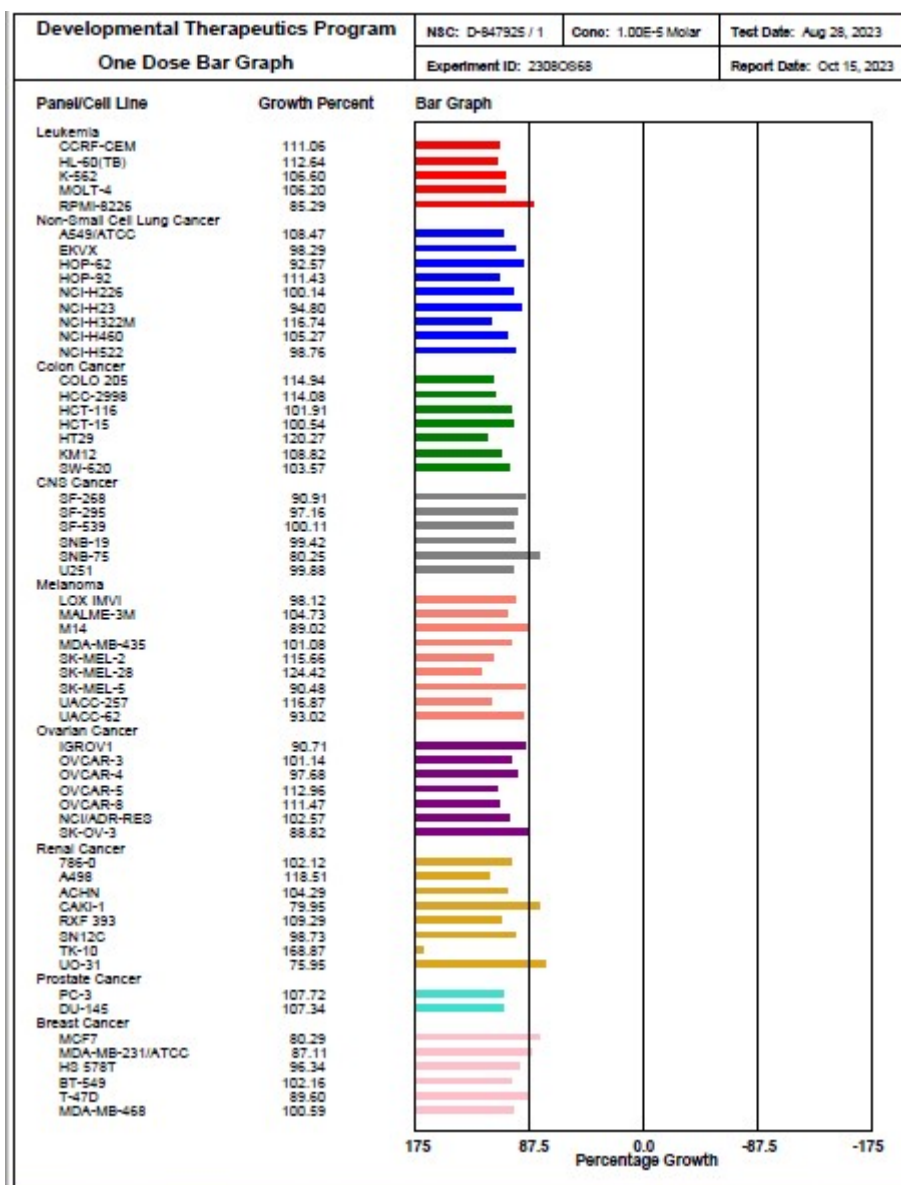

Fig. S82: *In vitro* growth (G%) for the NCI60 cancer cell lines upon treatment with 10  $\mu$ M of Compound 5e

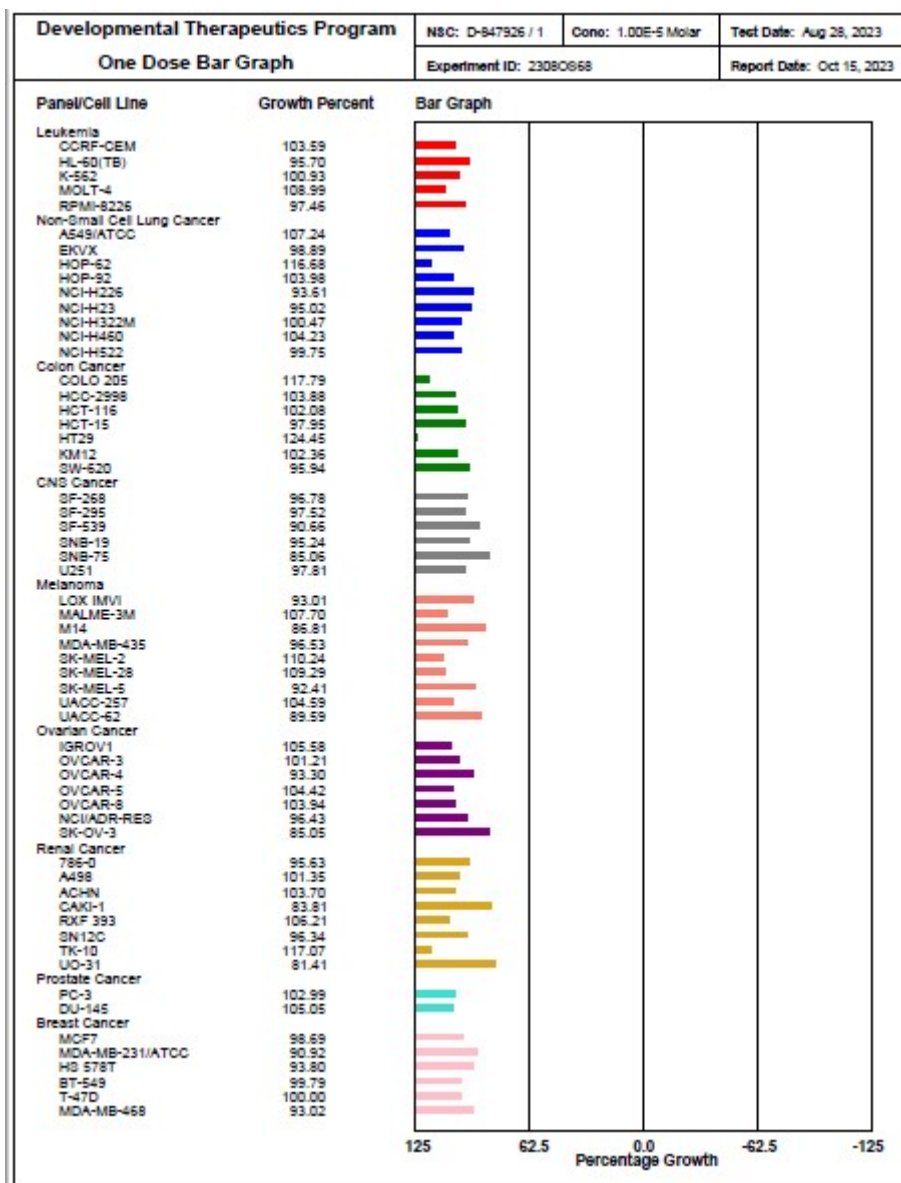

Fig. S83: *In vitro* growth (G%) for the NCI60 cancer cell lines upon treatment with 10  $\mu$ M of Compound 6a



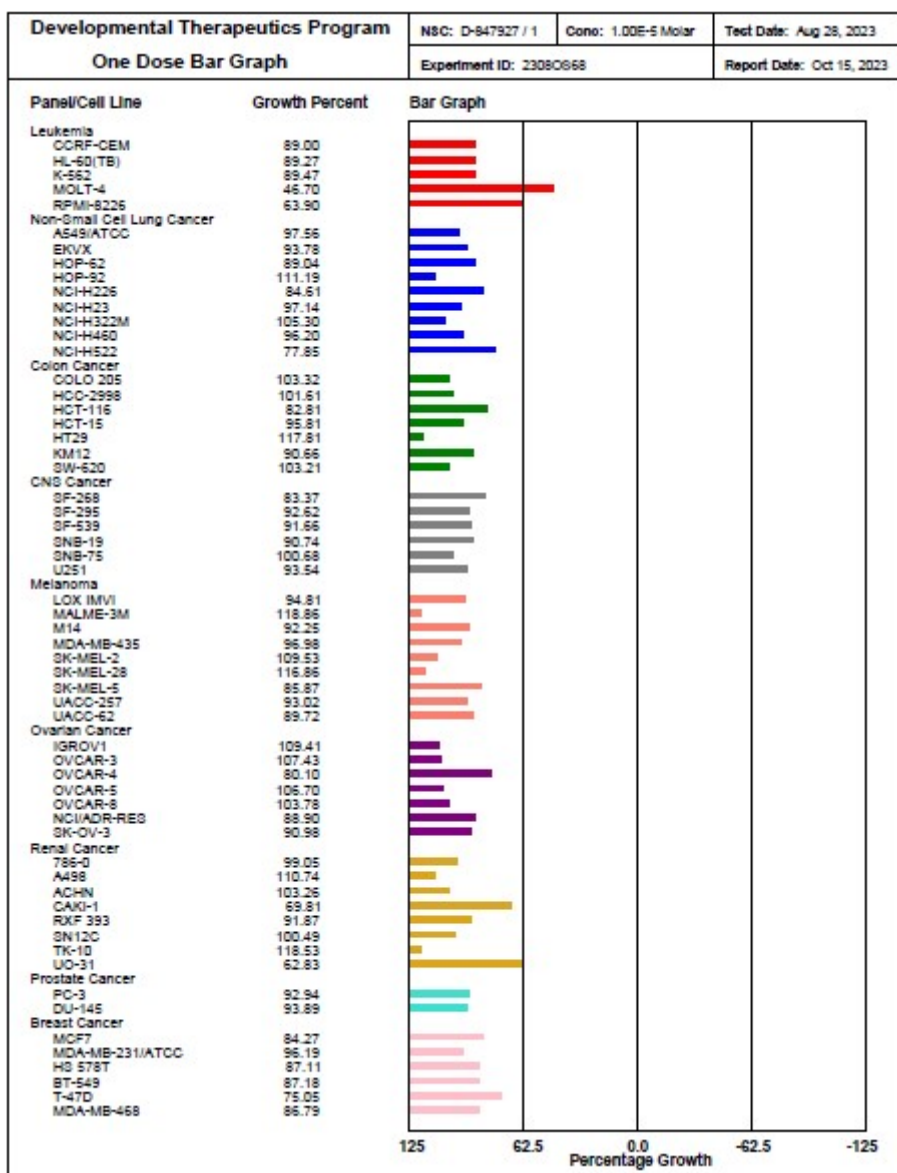

Fig. S84: *In vitro* growth (G%) for the NCI60 cancer cell lines upon treatment with 10  $\mu$ M of Compound 6b

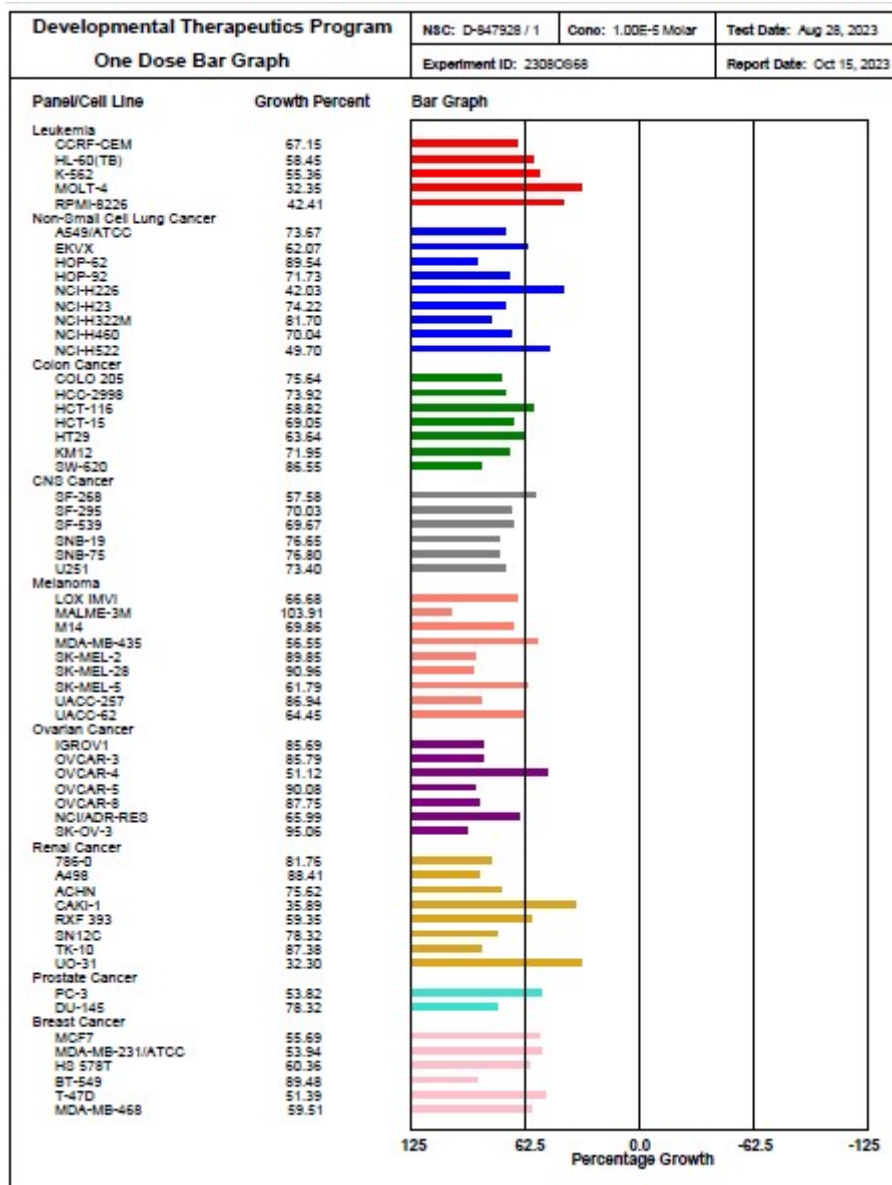

Fig. S85: *In vitro* growth (G%) for the NCI60 cancer cell lines upon treatment with 10  $\mu$ M of Compound 6c

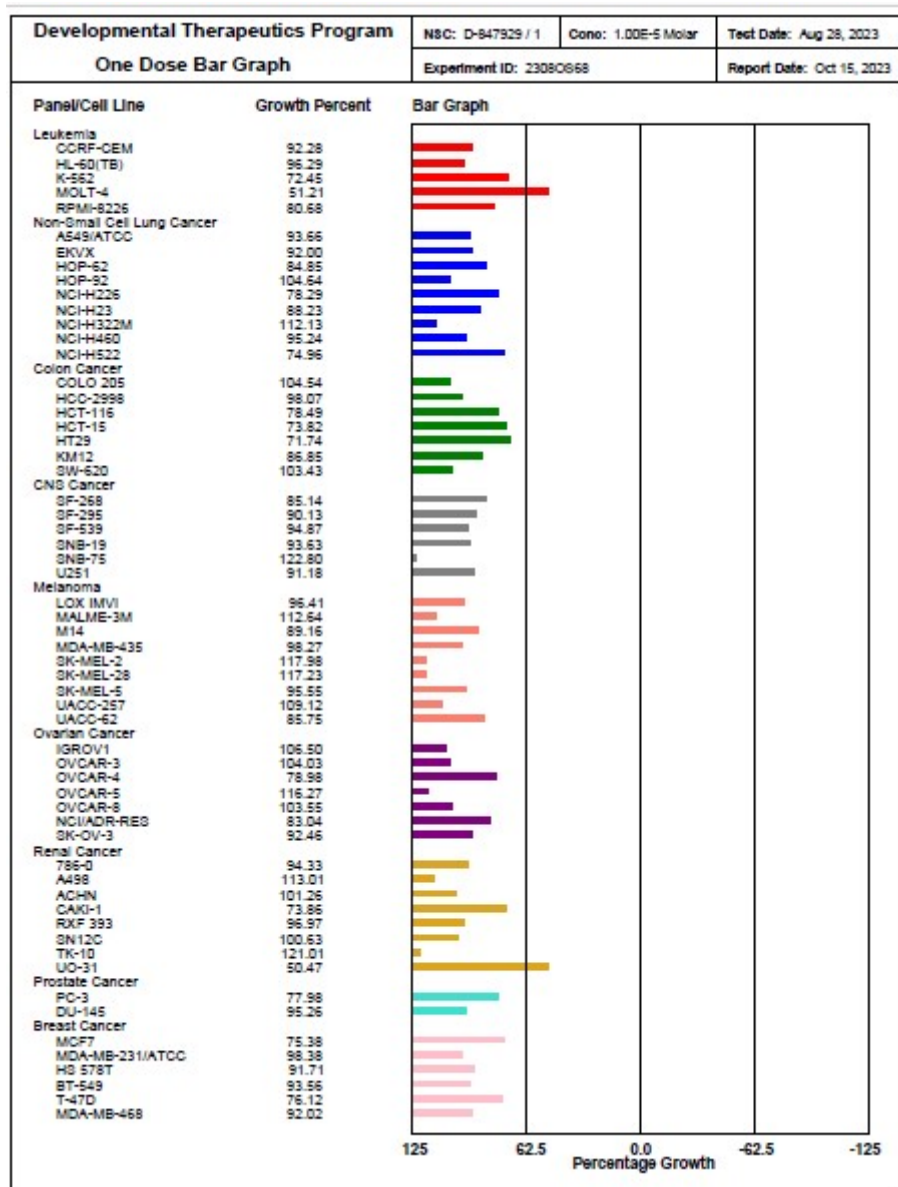

Fig. S86: *In vitro* growth (G%) for the NCI60 cancer cell lines upon treatment with 10  $\mu$ M of Compound 6d

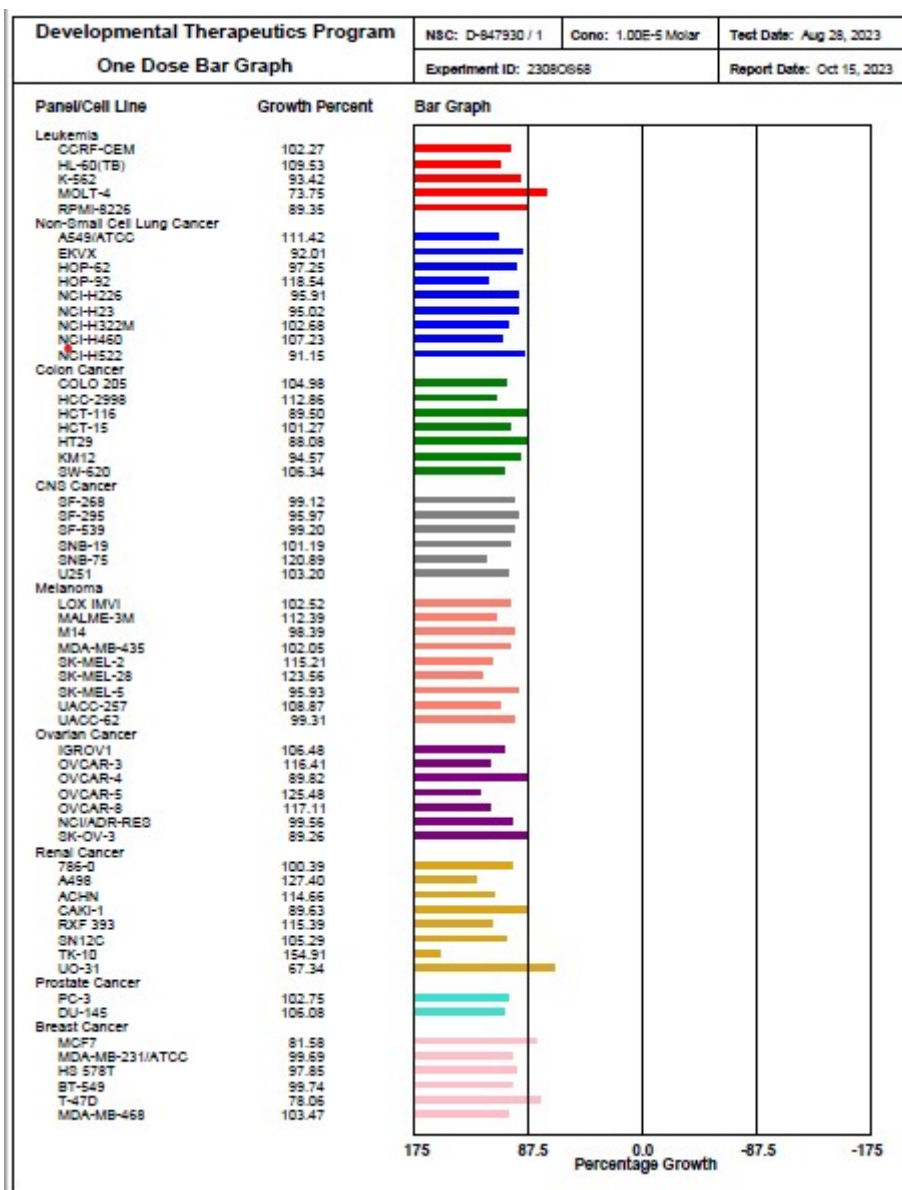

**Fig. S87: *In vitro* growth (G%) for the NCI60 cancer cell lines upon treatment with 10  $\mu$ M of Compound 6e**

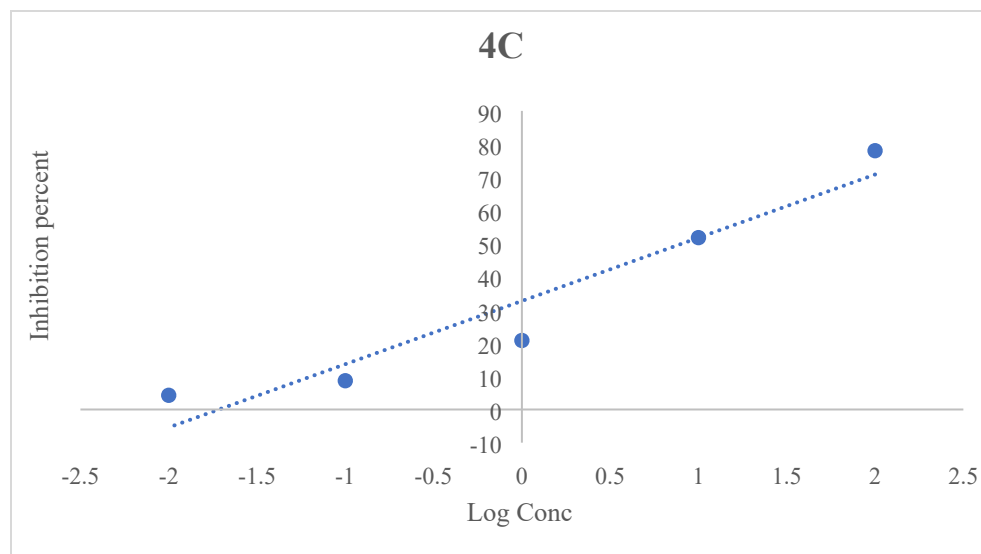

**Fig. S88:** A graph represent the tubulin polymerization assay of Compound 4C

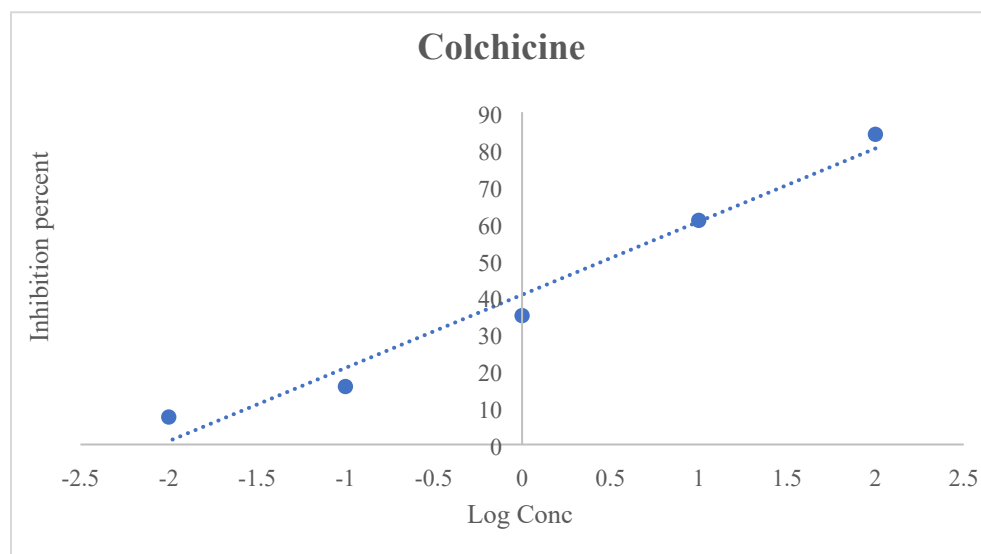

**Fig. S89:** A graph represent the tubulin polymerization assay of colchicine



**Fig. S90:** A graph represent the tubulin polymerization assay of CA-4

**Table S3:** Average of percentages of cells at early apoptosis, late apoptosis, and necrosis of control non-treated cells, 4c, and colchicine-treated cells.

|   | Sample     | Total Cell Death (%) | Early Apoptosis (%) | Late Apoptosis (%) | Necrosis (%) |
|---|------------|----------------------|---------------------|--------------------|--------------|
| 1 | Control    | 2.37 ± 1.56          | 0.52 ± 0.3          | 0.19 ± 0.08        | 1.66 ± 0.97  |
| 2 | 4c         | 29.15 ± 2.9          | 7.44 ± 1.59         | 17.1 ± 1.9         | 4.61 ± 2     |
| 3 | Colchicine | 37.22 ± 2.8          | 19.19 ± 0.87        | 6.62 ± 0.75        | 11.41 ± 2.8  |

**Docking studies:**

**Table S4:** Binding interactions, group of binding, type of interactions and interaction energies of Colchicine, 3b,c, 4c, and 5c into the colchicine binding site of tubulin enzyme.

| Compound               | Amino acids.....Interacted group           | Type of interaction | Affinity (Kcal/mol) |
|------------------------|--------------------------------------------|---------------------|---------------------|
| Ligand<br>(Colchicine) | Val 181.... Tetrahydrobenzoheptalene (C=O) | H-Bond              | -9.8                |
|                        | Val 238.... Trimethoxy phenyl              | H-Bond              |                     |
|                        | Cys 241....Trimethoxy phenyl               | π-alkyl             |                     |

---

|    |                                                                |               |      |
|----|----------------------------------------------------------------|---------------|------|
|    | Leu 242....Trimethoxy phenyl                                   | $\pi$ -alkyl  |      |
|    | Leu 248.... Trimethoxy phenyl                                  | $\pi$ -sigma  |      |
|    | Ala 250.... Trimethoxy phenyl                                  | H-Bond        |      |
|    | Asp 251.... Trimethoxy phenyl                                  | H-Bond        |      |
|    | Leu 255.... Trimethoxy phenyl                                  | $\pi$ -sigma  |      |
|    | Met 259.... Tetrahydrobenzoheptalene                           | $\pi$ -sulfur |      |
|    | Val 315.... Tetrahydrobenzoheptalene (OCH <sub>3</sub> )       | H-Bond        |      |
|    | Ala 316....tetrahydrobenzoheptalene ring                       | $\pi$ -alkyl  |      |
|    | Ile 318.... Trimethoxy phenyl                                  | $\pi$ -alkyl  |      |
|    | Asn 350.... Tetrahydrobenzoheptalene (OCH <sub>3</sub> )       | H-Bond        |      |
|    | Lys 352.... tetrahydrobenzoheptalene                           | $\pi$ -alkyl  |      |
|    | Ile 378.... Trimethoxy phenyl                                  | $\pi$ -alkyl  |      |
|    | Ala 180....dimethoxyphenyl ring                                | $\pi$ -alkyl  |      |
|    | Glu 183.... dimethoxyphenyl ring                               | H-bond        |      |
|    | Ser 178.... dimethoxyphenyl ring                               | H-bond        |      |
|    | Cys 241....chloroethylquinoline ring                           | $\pi$ -alkyl  |      |
|    | Leu 248.... dimethoxyphenyl ring,<br>chloroethylquinoline ring | $\pi$ - sigma | -9.0 |
| 3b | Ala 250.... chloroethylquinoline ring                          | $\pi$ -alkyl  |      |
|    | Leu 255.... chloroethylquinoline ring                          | $\pi$ - sigma |      |
|    | Ala 316.... chloroethylquinoline ring                          | $\pi$ -alkyl  |      |
|    | Ile 318.... chloroethylquinoline ring                          | $\pi$ -alkyl  |      |
|    | Lys 352.... chloroethylquinoline ring                          | $\pi$ -alkyl  |      |
|    | Ala 180....trimethoxyphenyl ring                               | $\pi$ -alkyl  |      |
| 3c | Ser 178.... trimethoxyphenyl ring                              | H-bond        | -8.0 |

---

|    |                                                                     |                               |       |
|----|---------------------------------------------------------------------|-------------------------------|-------|
|    | Cys 241....chloroethylquinoline ring                                | $\pi$ -alkyl                  |       |
|    | Leu 248.... dimethoxyphenyl ring,<br>chloroethylquinoline ring      | $\pi$ - sigma<br>$\pi$ -alkyl |       |
|    | Ala 250.... chloroethylquinoline ring                               | $\pi$ -alkyl                  |       |
|    | Lys 254.... trimethoxyphenyl ring                                   | $\pi$ - sigma                 |       |
|    | Leu 255.... chloroethylquinoline ring                               | van der<br>waals              |       |
|    | Ala 316.... chloroethylquinoline ring                               |                               |       |
|    | Ile 318.... chloroethylquinoline ring                               | $\pi$ -alkyl                  |       |
|    | Lys 352.... chloroethylquinoline ring                               |                               |       |
|    | Ser 178.... Trimethoxyphenyl ring                                   | H-bond                        |       |
|    | Thr 179.... 2-oxo-1,2-dihydropyridine ring                          | H-bond                        |       |
|    | Ala 180.... 2-oxo-1,2-dihydropyridine ring                          | H-bond                        |       |
|    | Tyr 224.... Trimethoxyphenyl ring                                   | H-bond                        |       |
|    | Cys 241.... chloroethylquinoline ring                               | $\pi$ -alkyl                  |       |
|    | Gln 247.... Trimethoxyphenyl ring                                   | H-bond                        |       |
| 4c | Leu 248.... chloroethylquinoline ring                               | $\pi$ - sigma                 | -11.5 |
|    | Ala 250.... chloroethylquinoline ring                               | $\pi$ -alkyl                  |       |
|    | Leu 255.... chloroethylquinoline ring                               | $\pi$ - sigma                 |       |
|    | Asn 258....2-oxo-1,2-dihydropyridine ring                           | H-bond                        |       |
|    | Ile 318.... chloroethylquinoline ring                               | $\pi$ -alkyl                  |       |
|    | Lys 352....2-oxo-1,2-dihydropyridine ring                           | $\pi$ -alkyl                  |       |
|    | Ala 180.... 2-thioxo-1,2-dihydropyridine ring,<br>trimethoxy phenyl | $\pi$ -alkyl<br>H-bond        |       |
| 5c | Val 181....2-thioxo-1,2-dihydropyridine ring                        | H-bond                        | -10.9 |
|    | Tyr 224.... Trimethoxyphenyl ring                                   | $\pi$ -alkyl                  |       |



---

|                                                                          |               |
|--------------------------------------------------------------------------|---------------|
| Cys 241.... chloroethylquinoline ring                                    | H-bond        |
| Gln 247.... Trimethoxyphenyl ring                                        | $\pi$ - sigma |
| Leu 248.... chloroethylquinoline ring, 2-thioxo-1,2-dihydropyridine ring | $\pi$ -alkyl  |
| Ala 250.... chloroethylquinoline ring                                    | $\pi$ - sigma |
| Leu 255.... chloroethylquinoline ring                                    | $\pi$ - alkyl |
| Ile 318.... chloroethylquinoline ring                                    | $\pi$ - alkyl |
| Lys 352....2-thioxo-1,2-dihydropyridine ring                             |               |

---
